# Supplementary material for: Molecular Profiling of the Residual Disease of Triple-Negative Breast Cancers after Neoadjuvant Chemotherapy Identifies Actionable Therapeutic Targets
Source: Oxford University Press journal article supplement (doi:10.1158/2159-8290.cd-13-0286), 2013-12-19
Supplement: 21598290cd130286-sup-supp_tables.xlsx [file 21598290cd130286-sup-supp_tables.xlsx]

## Sheet: Supplemental Table 1
	Median	Min	Max
Age	48	24	78
		N	%
Stage	IIa	3	0.027027
	IIb	5	0.045045
	IIIa	13	0.117117
	IIIb	77	0.693694
	IIIc	10	0.0900901
	NA	3	0.027027
Neoadjuvant taxane	Yes	55	0.495495
	No	53	0.477477
	NA	3	0.027027
Menopause status	Pre	55	0.495495
	Post	53	0.477477
	NA	3	0.027027
Node status	Pos	70	0.630631
	Neg	37	0.333333
	NA	4	0.036036

## Sheet: Supplemental Table 2
182 cancer related genes, oncogenes and tumor suppressor genes								14 genes with intronic intervals for fusion gene identification
HUGO SYMBOL	HUGO SYMBOL	HUGO SYMBOL	HUGO SYMBOL	HUGO SYMBOL	HUGO SYMBOL			HUGO SYMBOL	HUGO SYMBOL	HUGO SYMBOL	HUGO SYMBOL	HUGO SYMBOL
ABL1	CD79B	ERCC2	IRS2	MYCN	RPTOR			ALK	EGFR	ETV5	MLL	RET
ABL2	CDH1	ERG	JAK1	NF1	RUNX1			BCR	ETV1	ETV6	RAF1	TMPRSS2
AKT1	CDH2	ESR1	JAK2	NF2	SMAD2			BRAF	ETV4	EWSR1	RARA
AKT2	CDH20	EZH2	JAK3	NKX2-1	SMAD3
AKT3	CDH5	FANCA	JUN	NOTCH1	SMAD4			34 ADME-related genes
ALK	CDK4	FBXW7	KDM6A	NPM1	SMARCA4			HUGO SYMBOL	HUGO SYMBOL	HUGO SYMBOL	HUGO SYMBOL	HUGO SYMBOL
APC	CDK6	FGFR1	KDR	NRAS	SMARCB1			ABCB1	CYP2C8	ESR2	MTHFR	SULT1A1
AR	CDK8	FGFR2	KIT	NTRK1	SMO			ABCC2	CYP2D6	FCGR3A	NQO1	TPMT
ARAF	CDKN2A	FGFR3	KRAS	NTRK2	SOX10			ABCC4	CYP3A4	FGFR4	NRP2	TYMS
ARFRP1	CDKN2B	FGFR4	LRP1B	NTRK3	SOX2			ABCG2	CYP3A5	GSTP1	SLC19A1	UGT1A1
ARID1A	CDKN2C	FLT1	LRP6	PAK3	SRC			C1orf144	DPYD	ITPA	SLC22A2	UMPS
ATM	CEBPA	FLT3	LTK	PAX5	STAT3			CYP1B1	ERCC2	LRP2	SLCO1B3	VEGF
ATR	CHEK1	FLT4	MAP2K1	PDGFRA	STK11			CYP2C19	ESR1	MAN1B1	SOD2
AURKA	CHEK2	FOXP4	MAP2K2	PDGFRB	SUFU
AURKB	CRKL	GATA1	MAP2K4	PHLPP2	TBX22
BAP1	CRLF2	GNA11	MCL1	PIK3CA	TET2
BCL2	CTNNB1	GNAQ	MDM2	PIK3CG	TGFBR2
BCL2A1	DDR2	GNAS	MDM4	PIK3R1	TNFAIP3
BCL2L1	DNMT3A	GPR124	MEN1	PKHD1	TNKS
BCL2L2	DOT1L	GUCY1A2	MET	PLCG1	TNKS2
BCL6	EGFR	HOXA3	MITF	PRKDC	TOP1
BRAF	EPHA3	HRAS	MLH1	PTCH1	TP53
BRCA1	EPHA5	HSP90AA1	MLL	PTCH2	TSC1
BRCA2	EPHA6	IDH1	MPL	PTEN	TSC2
CARD11	EPHA7	IDH2	MRE11A	PTPN11	USP9X
CBL	EPHB1	IGF1R	MSH2	PTPRD	VHL
CCND1	EPHB4	IGF2R	MSH6	RAF1	WT1
CCND2	EPHB6	IKBKE	MTOR	RARA
CCND3	ERBB2	IKZF1	MUTYH	RB1
CCNE1	ERBB3	INHBA	MYC	RET
CD79A	ERBB4	INSR	MYCL1	RICTOR

## Sheet: Supplemental Table 3
SAMPLE ID	PRE/POST	MEDIAN EXON DEPTH	PURITY ASSESSMENT	KNOWN SOMATIC SHORT-VARIANTS (PERCENT-READS,COVERAGE)	LIKELY SOMATIC SHORT-VARIANTS (PERCENT-READS, COVERAGE)	HIGH-LEVEL (CN>8) AND FOCAL (CN>5) AMPLIFICATIONS OF GENES KNOWN TO BE RECURRENTLY AMPLIFIED IN CANCER (COPY-NUMBER,EXONS)	HOMOZYGOUS DELETIONS OF GENES KNOWN TO BE RECURRENTLY DELETED IN CANCER (0,EXONS)	LIKELY FUNCTIONAL REARRANGEMENTS (e.g., GENE FUSIONS) (GENE1_GENE2_GENOMIC EVENT DESCRIPTION_SUPPORTING-READS)	SHORT VARIANTS OF UNKNOWN SIGNIFICANCE (PERCENT-READS,COVERAGE)
PERU_28	POST	285	70	RUNX1_c.460C>T_p.Q154*(0.28,966), TP53_c.641A>G_p.H214R(0.61,233)	none	MCL1_amplification(9, exons 5 of 5), MYC_amplification(9, exons 5 of 5), CCND1_amplification(7, exons 4 of 5)	CDKN2A_loss(0, exons 6 of 6), CDKN2B_loss(0, exons 4 of 4)	none	DDR2_c.1034C>A_p.A345D(0.29,450), IRS2_c.2707A>G_p.S903G(0.22,647), PLCG1_c.3649_3651delGAG_p.E1217del(0.44,181), RPTOR_c.493_501delTGGGTCTTC_p.W165_F167del(0.26,180)
PERU_10	POST	148	79	PIK3CA_c.3140A>G_p.H1047R(0.44,205), PTEN_c.733C>T_p.Q245*(0.9,88), RB1_c.1072C>T_p.R358*(0.86,164), TP53_c.1015G>T_p.E339*(0.97,172)	RUNX1_c.363_364insCC_p.D123fs*11(0.62,195)	very low coverage, copy number not analyzed	very low coverage, copy number not analyzed	none	ALK_c.1842G>T_p.W614C(0.34,251), DOT1L_c.994C>T_p.P332S(0.32,153), DOT1L_c.4129G>A_p.A1377T(0.54,113), EPHA6_c.189a>C_p.E63D(0.41,147), MSH2_c.1166G>A_p.R389Q(0.51,215), TSC1_c.1760A>G_p.K587R(0.54,113), TSC2_c.3520C>T_p.R1174W(0.52,104)
PERU_34	POST	549	40	PIK3CA_c.3140A>G_p.H1047R(0.37,923), TP53_c.989delT_p.Q331fs*14(0.28,594)	none	EGFR_amplification(16, exons 30 of 30), MCL1_amplification(8, exons 5 of 5), MYC_amplification(11, exons 5 of 5)	none	none	AKT2_c.170T>C_p.V57A(0.12,530), BRCA2_c.3101T>C_p.I1034T(0.39,544), TSC1_c.1760A>G_p.K587R(0.45,509)
PERU_60	POST	1053	11	NF1_c.1105C>T_p.Q369*(0.06,1154), PIK3CA_c.1633G>C_p.E545Q(0.07,1360), PTEN_c.376G>A_p.A126T(0.05,1461), PTPN11_c.215C>T_p.A72V(0.1,1116), RB1_c.649C>T_p.Q217*(0.05,1393), TP53_c.761T>A_p.I254N(0.04,699)	ARID1A_c.1001C>A_p.S334*(0.07,475), PTEN_c.164+1G>A_p.splice(0.06,1046)	none	none	none	AKT1_c.145G>A_p.E49K(0.06,1146), ALK_c.1652G>A_p.R551Q(0.49,343), BRCA2_c.5209G>C_p.D1737H(0.06,1219), EPHA5_c.2026A>T_p.T676S(0.51,1501), KIT_c.908C>T_p.T303I(0.49,1160), MLL_c.158c>T_p.A53V(0.65,336), PTCH2_c.1747G>A_p.E583K(0.05,476), RICTOR_c.2638A>G_p.I880V(0.51,1349)
PERU_23	POST	817	50	TP53_c.404G>A_p.C135Y(0.58,494)	FBXW7_c.651_651delG_p.Q218fs*21(0.25,826)	CCND3_amplification(9, exons 5 of 5), EGFR_amplification(16+, exons 30 of 30), KRAS_amplification(13, exons 5 of 5)	none	none	ABL1_c.2146C>T_p.R716C(0.77,470), CDH1_c.1004G>A_p.R335Q(0.39,646), FGFR3_c.1715c>T_p.P572L(0.81,1360), MPL_c.664C>T_p.P222S(0.22,708), NOTCH1_c.2266G>A_p.E756K(0.79,625), SMARCA4_c.1060C>T_p.P354S(0.25,2301)
PERU_12	POST	486	40	CDKN2A_c.293A>C_p.H98P(0.59,719), TP53_c.469G>T_p.V157F(0.4,346)	KDM6A_c.3011_3011delT_p.L1004fs*44(0.22,344)	CCND3_amplification(10, exons 5 of 5), CDK6_amplification(8, exons 7 of 7), MCL1_amplification(10, exons 5 of 5)	none	none	ATR_c.6066G>A_p.M2022I(0.15,447), BRAF_c.947C>T_p.S316L(0.14,752), CEBPA_c.568_569insGGTGCG_p.S190_H191insHP(0.43,90), EPHB6_c.544G>T_p.G182*(0.2,516), FGFR3_c.347G>A_p.R116H(0.69,303), GPR124_c.2233C>G_p.H745D(0.11,535), MLL_c.158c>T_p.A53V(0.26,209), TSC1_c.1760A>G_p.K587R(0.73,399)
PERU_24	POST	496	60	none	TP53_c.136_137insT_p.S46fs*6(0.73,472)	KRAS_amplification(9, exons 5 of 5), MCL1_amplification(11, exons 5 of 5)	PIK3R1_loss(0, exons 17 of 17), PTEN_loss(0, exons 8 of 9)	none	IDH1_c.532G>A_p.V178I(0.18,400), CYP2D6_c.291C>G_p.D97E(0.58,193), FGFR3_c.169G>A_p.V57M(0.79,253), INSR_c.4094_4095insCG_p.G1366fs*10(0.5,281), IRS2_c.589G>T_p.V197L(0.29,438), NOTCH1_c.3770C>G_p.P1257R(0.88,455), NTRK1_c.97G>T_p.A33S(0.69,380), PHLPP2_c.3416C>G_p.S1139C(0.53,400), PTCH2_c.1438G>A_p.E480K(0.37,233)
PERU_21	POST	1044	59	TP53_c.745A>T_p.R249W(0.62,871)	none	FGFR1_amplification(11, exons 18 of 18), MCL1_amplification(11, exons 5 of 5), MYC_amplification(13, exons 5 of 5)	none	FANCA_intergenicRegion_truncation_141	ATR_c.4585C>G_p.L1529V(0.29,1376), BRCA1_c.1969C>A_p.Q657K(0.9,1643), FANCA_c.70G>C_p.E24Q(0.19,316), FOXP4_c.1912G>A_p.G638R(0.22,759), LRP1B_c.6001A>C_p.I2001L(0.39,1482), LRP6_c.817G>A_p.A273T(0.84,1018), NTRK3_c.1349T>C_p.F450S(0.6,911), PRKDC_c.12355G>C_p.E4119Q(0.12,1631), PTCH1_c.1501C>G_p.Q501E(0.3,1014), RET_c.166C>A_p.L56M(0.72,635), TSC1_c.1760A>G_p.K587R(0.12,1161), UGT1A1_c.185C>A_p.…
PERU_36	POST	942	59	none	SMAD2_c.1280+1C>T_p.splice(0.32,569)	JAK2_amplification(7, exons 21 of 23)	RB1_loss(0, exons 27 of 27)	none	BCL6_c.1835T>A_p.V612E(0.07,1258), GNAS_c.1120_1155delCCGCCCCAGCCGATCCCGACTCCGGGGCGGCCCCTG_p.P374_L385del(0.32,1482), HOXA3_c.512G>A_p.S171N(0.84,1037), NTRK1_c.2380G>A_p.V794I(0.47,391), RPTOR_c.2989C>T_p.R997C(0.19,1167), TP53_c.703_720delACTGTTACACATGTAGTT_p.N235_S240del(0.36,672)
PERU_16	POST	723	69	none	none	AKT3_amplification(11, exons 14 of 14)	CDKN2A_loss(0, exons 6 of 6), CDKN2B_loss(0, exons 4 of 4)	LRP1B_LRP1B_truncation_41	FGFR3_c.1959+2T>C_p.splice(0.34,441), SOX10_c.1022_1023delAG_p.L342fs*59(0.42,388)
PERU_95	POST	1057	30	none	TP53_c.673-2T>C_p.splice(0.23,705)	MCL1_amplification(9, exons 5 of 5), MYC_amplification(8, exons 5 of 5)	none	none	BRCA1_c.140G>T_p.C47F(0.6,1110), DOT1L_c.3765G>T_p.K1255N(0.34,1007), FGFR4_c.750C>G_p.I250M(0.33,538), IGF2R_c.2566G>A_p.G856S(0.49,868), LRP1B_c.2568C>G_p.H856Q(0.55,1051)
PERU_74	POST	995	19	TP53_c.818G>A_p.R273H(0.19,859)	BRCA1_c.1009_1010insT_p.V340fs*6(0.56,765)	none	none	none	MSH2_c.1166G>A_p.R389Q(0.62,1013), TSC1_c.1760A>G_p.K587R(0.4,881)
PERU_70	POST	1080	20	CDKN2A_c.132C>A_p.Y44*(0.11,1335), TP53_c.637C>T_p.R213*(0.08,1129)	BRCA1_c.807_808insGCTCCACATG_p.T276fs*14(0.42,1272)	none	none	none	PDGFRB_c.3110C>A_p.P1037Q(0.41,752), TSC1_c.1760A>G_p.K587R(0.56,1052)
PERU_5	POST	818	69	ATM_c.7328G>A_p.R2443Q(0.82,611), TP53_c.490A>G_p.K164E(0.78,430)	none	IRS2_amplification(9, exons 5 of 5), MCL1_amplification(10, exons 5 of 5), MYC_amplification(12, exons 5 of 5)	none	none	AKT2_c.212A>G_p.N71S(0.37,822), AR_c.1202C>T_p.A401V(0.4,469), CD79A_c.419C>A_p.T140N(0.05,146), CEBPA_c.568_569insGGTGCG_p.S190_H191insHP(0.24,152), CHEK2_c.1510G>C_p.E504Q(0.12,329), JAK2_c.3082G>T_p.E1028*(0.58,1776), MTOR_c.1145A>G_p.N382S(0.71,1137), NOTCH1_c.3011C>T_p.S1004L(0.1,281), PIK3CA_c.1747-1G>A_p.splice(0.19,652)
PERU_19	POST	763	70	TP53_c.844C>T_p.R282W(0.65,724)	BRCA1_c.3406_3406delG_p.P1136fs*19(0.64,695), MSH6_c.496_496delT_p.Y166fs*8(0.3,647)	MYC_amplification(11, exons 5 of 5), AKT3_amplification(6,exons 14 of 14), MCL1_amplification(6,exons 5 of 5)	LRP1B_loss(0, exons 16 of 91), PTEN_loss(0, exons 9 of 9)	none	MYC_c.859G>A_p.A287T(0.08,2200), TSC1_c.1760A>G_p.K587R(0.15,667)
PERU_59	POST	676	40	TP53_c.438G>A_p.W146*(0.56,430)	none	CCND3_amplification(8, exons 5 of 5), MYC_amplification(16, exons 5 of 5), MCL1_amplification(12, exons 5 of 5)	none	none	ATR_c.556A>G_p.M186V(0.45,1082), EPHA6_c.434C>T_p.T145I(0.06,863), PRKDC_c.7441A>G_p.M2481V(0.23,1851), TET2_c.825T>G_p.N275K(0.26,559)
PERU_66	POST	687	30	ATM_c.1010G>A_p.R337H(0.42,692), PIK3CA_c.3140A>G_p.H1047R(0.09,897), TP53_c.1025G>C_p.R342P(0.15,570)	none	CCND1_amplification(14, exons 5 of 5), ERBB2_amplification(20, exons 27 of 27)	none	none	CARD11_c.1553G>A_p.R518Q(0.49,462), CEBPA_c.568_569insGGTGCG_p.S190_H191insHP(0.44,84), EPHB1_c.2282C>T_p.S761F(0.06,558), IKBKE_c.1613G>A_p.R538K(0.47,650), IKBKE_c.1686G>A_p.M562I(0.07,772), LTK_c.2019-2T>C_p.splice(0.52,544), MSH6_c.1294T>C_p.F432L(0.05,871), PKHD1_c.640C>A_p.Q214K(0.5,784), TSC1_c.1760A>G_p.K587R(0.53,731)
PERU_40	POST	433	90	TP53_c.748C>T_p.P250S(0.55,335), TP53_c.747G>T_p.R249S(0.56,335)	none	KRAS_amplification(10, exons 5 of 5)	none	none	EPHA5_c.1705C>G_p.Q569E(0.06,345), GNAS_c.839+1delGTTTGTGGAGTGACCGCCCACCCCCTG_p.splice(0.15,468), TSC1_c.1760A>G_p.K587R(0.76,328)
PERU_92	POST	727	80	none	TP53_c.782+1C>T_p.splice(0.1,472)	CRKL_amplification(7, exons 5 of 5), CDK4_amplification(6, exons 7 of 7), MDM2_amplification(6, exons 11 of 11), ERBB2_amplification(6, exons 27 of 27)	none	none	GPR124_c.1219G>A_p.G407S(0.56,485), PLCG1_c.3016C>G_p.L1006V(0.47,771), PTPRD_c.2105T>C_p.V702A(0.44,622), RB1_c.1967G>A_p.R656Q(0.05,709)
PERU_25	POST	983	49	TP53_c.548C>G_p.S183*(0.64,594)	none	AKT3_amplification(6, exons 14 of 14), JAK2_amplification(10, exons 23 of 23), MCL1_amplification(9, exons 5 of 5)	PTEN_loss(0, exons 7 of 9)	none	IKZF1_c.754G>C_p.D252H(0.1,1125), JAK1_c.1628G>A_p.C543Y(0.06,805), KIT_c.2887A>G_p.T963A(0.25,1391), NTRK2_c.1279G>A_p.G427S(0.62,1274), PIK3CG_c.2365C>T_p.P789S(0.17,1056), PIK3R1_c.1268_1273delAATTAC_p.K423_L425>I(0.2,1020), PKHD1_c.12107G>A_p.R4036Q(0.61,771)
PERU_79	POST	741	93	TP53_c.1025G>C_p.R342P(0.36,623)	none	none	none	none	MSH2_c.965G>A_p.G322D(0.25,986), AR_c.2220C>A_p.Y740*(0.11,751), BRCA2_c.9292T>C_p.Y3098H(0.69,807), MLL_c.158c>T_p.A53V(0.3,73), TSC1_c.1760A>G_p.K587R(0.48,736), TSC2_c.5201A>T_p.D1734V(0.33,434), CEBPA_c.564_566delGGC_p.P189del(0.09,67)
PERU_63	POST	596	20	NOTCH1_c.4757G>A_p.R1586H(0.54,479), TP53_c.637C>T_p.R213*(0.1,642)	none	MCL1_amplification(12, exons 5 of 5)	none	none	AKT2_c.551G>A_p.R184Q(0.54,462), FLT1_c.35G>A_p.C12Y(0.5,438), LTK_c.1915T>C_p.F639L(0.43,245)
PERU_44	POST	477	44	none	BAP1_c.1131_1132insGGCCCACACCTGCCGC_p.S384fs*19(0.38,189), TP53_c.327_327delG_p.R110fs*13(0.57,301)	MCL1_amplification(12, exons 5 of 5)	CDKN2A_loss(0, exons 6 of 6), CDKN2B_loss(0, exons 4 of 4)	none	AR_c.1382_1420delGCGGCGGCGGCGGCGGCGGCGGCGGCGGCGGCGGCGGCG_p.G461_G473del(0.37,148), ARID1A_c.5944G>A_p.V1982I(0.43,460), CEBPA_c.568_569insGGTGCG_p.S190_H191insHP(0.51,134), EZH2_c.586A>G_p.R196G(0.49,749), IGF2R_c.2566G>A_p.G856S(0.54,271), LRP1B_c.7417G>A_p.G2473R(0.47,632), MLL_c.158c>T_p.A53V(0.77,163), PAX5_c.955G>A_p.V319I(0.36,260), TET2_c.153_167delCACCAAGTGGCACTC_p.T52_S56del(0.13,565)
PERU_96	POST	658	70	PIK3CA_c.1634A>C_p.E545A(0.09,1001), TP53_c.811G>T_p.E271*(0.14,737)	none	ERBB2_amplification(14, exons 27 of 27), MCL1_amplification(14, exons 5 of 5)	none	none	ATM_c.5557G>A_p.D1853N(1.0,730), PDGFRB_c.1474G>A_p.V492M(0.54,475)
PERU_33	POST	584	70	PIK3CA_c.3140A>G_p.H1047R(0.25,831), TP53_c.991C>T_p.Q331*(0.32,587)	none	ERBB2_amplification(20+, exons 27 of 27), MCL1_amplification(10, exons 5 of 5)	none	none	ATM_c.5557G>A_p.D1853N(0.59,499), ARID1A_c.694A>C_p.S232R(0.35,505), ATR_c.7912C>G_p.L2638V(0.1,1452), ERCC2_c.1438A>G_p.T480A(0.42,424), PRKDC_c.4712A>G_p.Y1571C(0.2,1191), RARA_c.69G>C_p.Q23H(0.11,912)
PERU_76	POST	526	42	PIK3CA_c.3140A>G_p.H1047R(0.4,948), PTEN_c.733C>T_p.Q245*(0.68,747), TP53_c.764T>C_p.I255T(0.43,279)	none	MCL1_amplification(11, exons 5 of 5)	none	none	CDH2_c.865G>A_p.V289I(0.48,256), EPHA3_c.49G>C_p.D17H(0.2,326), RICTOR_c.2638A>G_p.I880V(0.49,608), SMARCB1_c.1135G>A_p.A379T(0.3,343), TSC1_c.1760A>G_p.K587R(0.18,442)
PERU_82	POST	618	38	TP53_c.584T>C_p.I195T(0.34,477)	BRCA1_c.3757_3758delGA_p.S1253fs*1(0.7,867)	MCL1_amplification(9, exons 5 of 5), MYC_amplification(10, exons 5 of 5)	none	none	BCL6_c.702T>G_p.S234R(0.19,575), IDH1_c.677T>A_p.I226N(0.18,780), IKBKE_c.680C>A_p.P227Q(0.07,501), IRS2_c.17g>A_p.R6Q(0.41,339), LRP6_c.970A>G_p.K324E(0.49,592), MLH1_c.2185C>G_p.L729V(0.09,789), TNKS2_c.2519G>C_p.S840T(0.2,752), TSC1_c.1760A>G_p.K587R(0.48,579)
PERU_8	POST	427	90	TP53_c.524G>A_p.R175H(0.82,255)	none	none	none	none	KIT_c.1621A>C_p.M541L(0.5,764), ALK_c.480G>T_p.E160D(0.56,308), ATM_c.6434A>C_p.E2145A(0.89,443), CTNNB1_c.2289G>A_p.M763I(0.88,276), EPHA3_c.1619G>C_p.S540T(0.6,216), EPHB6_c.2695C>T_p.Q899*(0.26,474), LRP6_c.4833_4842delGGCCCCTCCTCAGGAGGAG_p.D1611fs*1+(0.19,698), MLL_c.158c>T_p.A53V(0.94,216), MPL_c.652T>A_p.W218R(0.34,328), NTRK2_c.491A>T_p.E164V(0.59,599), NTRK2_c.1781G>C_p.S594T(0.29,494), T…
PERU_32	POST	1011	39	TP53_c.613T>G_p.Y205D(0.45,934)	none	EGFR_amplification(7, exons 30 of 30), JAK2_amplification(8, exons 20 of 23)	none	none	ARID1A_c.835C>T_p.P279S(0.5,912), MLL_c.158c>T_p.A53V(0.84,713), NOTCH1_c.3351G>C_p.Q1117H(0.19,1004), PTCH2_c.2722G>A_p.A908T(0.58,813), SOX10_c.830A>G_p.D277G(0.45,555), TSC1_c.1760A>G_p.K587R(0.75,796)
PERU_98	POST	730	10	VHL_c.3G>T_p.M1I(0.52,611)	none	none	none	none	BAP1_c.838C>A_p.Q280K(0.45,718), BRCA2_c.4333A>G_p.K1445E(0.49,1105), CYP2C8_c.370C>T_p.R124W(0.48,617), IGF2R_c.4138G>C_p.D1380H(0.42,650), SMO_c.892G>A_p.D298N(0.5,449), TSC1_c.1760A>G_p.K587R(0.53,709)
PERU_94	POST	271	40	none	TP53_c.376_380delGAGTACTG_p.Y126fs*21(0.34,101)	IGF1R_amplification(7, exons 21 of 21), MCL1_amplification(12, exons 5 of 5), MYC_amplification(9, exons 5 of 5)	none	none	BRCA2_c.205C>A_p.P69T(0.48,707), BRCA2_c.3685G>A_p.V1229I(0.51,569), MLL_c.158c>T_p.A53V(0.68,85), NOTCH1_c.7543G>C_p.E2515Q(0.42,399), PTCH1_c.37_38insCGC_p.R13_G14insG(0.31,75), TSC1_c.1760A>G_p.K587R(0.44,245)
PERU_29	POST	864	89	TP53_c.644G>T_p.S215I(0.32,802)	none	MCL1_amplification(7, exons 5 of 5)	none	none	AR_c.1847G>A_p.R616H(0.26,1147), CDH2_c.1348A>G_p.I450V(0.54,637), CEBPA_c.568_569insGGTGCG_p.S190_H191insHP(0.36,107), EPHA6_c.965T>C_p.L322P(0.47,850), FLT1_c.35G>A_p.C12Y(0.48,765), GUCY1A2_c.171_172insCGGGGCCGGGGC_p.A57_A58insAPAP(0.71,133), IGF2R_c.1448G>A_p.R483H(0.41,1048), MLL_c.158c>T_p.A53V(0.78,452), PTCH1_c.3961G>C_p.D1321H(0.26,798), TNKS_c.3689G>T_p.G1230V(0.32,597)
PERU_43	POST	245	77	TP53_c.637C>T_p.R213*(0.68,189)	BRCA1_c.3381T>G_p.Y1127*(0.79,369)	MCL1_amplification(10, exons 5 of 5), MYC_amplification(8, exons 5 of 5)	none	none	FGFR3_c.1150T>C_p.F384L(0.83,124), FANCA_c.3733C>A_p.Q1245K(0.52,439), LRP1B_c.12632G>A_p.S4211N(0.5,298), MLL_c.158c>T_p.A53V(1.0,76), MPL_c.1892A>G_p.Y631C(0.41,157), CEBPA_c.564_566delGGC_p.P189del(0.25,142)
PERU_72	POST	608	60	PIK3CA_c.3140A>G_p.H1047R(0.36,941)	CDH1_c.1937_1956delCTTTCTCCAGCCCAAGAATCTATCATTTTG_p.splice(0.41,486)	AKT1_amplification(10, exons 13 of 13), MCL1_amplification(8, exons 5 of 5), MYC_amplification(9, exons 5 of 5)	PTEN_loss(0, exons 4 of 9), RB1_loss(0, exons 15 of 27)	RB1_RB1_truncation_93	PTCH1_c.3583A>T_p.T1195S(0.18,479), APC_c.1899A>C_p.E633D(0.31,572), ATM_c.390T>A_p.D130E(0.79,743), CEBPA_c.568_569insGGTGCG_p.S190_H191insHP(0.71,102), DDR2_c.1100-1G>A_p.splice(0.11,1198), DOT1L_c.3765G>T_p.K1255N(0.09,1027), FLT1_c.35G>A_p.C12Y(0.19,361), PKHD1_c.3637A>T_p.I1213F(0.36,446)
PERU_2	POST	475	90	TP53_c.916C>T_p.R306*(0.9,310)	none	none	none	none	CRKL_c.191A>G_p.N64S(0.47,760), FLT4_c.233C>T_p.T78M(0.47,417), NTRK1_c.2234A>G_p.E745G(0.65,339), PTCH1_c.3686C>T_p.T1229M(0.47,453)
PERU_39	POST	569	65	AKT1_c.49G>A_p.E17K(0.81,618), TP53_c.524G>A_p.R175H(0.66,335)	NF1_c.2650G>T_p.E884*(0.64,504), TSC1_c.1546C>T_p.Q516*(0.2,391)	CDK6_amplification(7, exons 7 of 7), MET_amplification(7, exons 19 of 20)	CDKN2A_loss(0, exons 6 of 6), CDKN2B_loss(0, exons 4 of 4)	none	CEBPA_c.564_566delGGC_p.P189del(0.26,371), LRP1B_c.13487A>T_p.N4496I(0.24,575), MLL_c.1027G>T_p.E343*(0.23,598), MTOR_c.2531T>C_p.L844P(0.16,938), PTPRD_c.2105T>C_p.V702A(0.15,358), SMO_c.1429C>T_p.Q477*(0.31,900), TP53_c.1066G>C_p.G356R(0.85,387), TSC1_c.1760A>G_p.K587R(0.11,647)
PERU_78	POST	988	50	TP53_c.527G>A_p.C176Y(0.26,713)	none	CCND3_amplification(8, exons 5 of 5)	none	none	KIT_c.1621A>C_p.M541L(0.66,991), AURKB_c.463G>C_p.E155Q(0.19,864), EPHA5_c.1280T>G_p.M427R(0.36,1115), EPHB6_c.734C>T_p.T245M(0.73,968), ERBB3_c.3373C>T_p.R1125W(0.57,567), ERBB4_c.2125C>G_p.Q709E(0.28,987), GPR124_c.3938A>T_p.D1313V(0.6,993), INHBA_c.1217A>G_p.D406G(0.2,851), JAK2_c.2359T>A_p.C787S(0.54,1293), KRAS_c.535G>A_p.G179S(0.33,1319), MEN1_c.1043A>C_p.D348A(0.46,767), PAK3_c.699G>T_p.L2…
PERU_37	POST	701	59	TP53_c.637C>T_p.R213*(0.81,871)	none	ARFRP1_amplification(8, exons 6 of 6), AURKA_amplification(8, exons 8 of 8), IGF1R_amplification(10, exons 21 of 21), MCL1_amplification(10, exons 5 of 5), MYC_amplification(12, exons 5 of 5)	RB1_loss(0, exons 14 of 27)	none	ATR_c.1343C>A_p.T448N(0.72,1259), CEBPA_c.564_566delGGC_p.P189del(0.22,308), FOXP4_c.1817G>A_p.G606D(0.41,563), IGF1R_c.2195T>A_p.V732E(0.19,906), PDGFRA_c.3218_3218delT_p.M1073fs*6(0.54,960), TSC2_c.583A>G_p.I195V(0.56,993), TSC2_c.3521G>A_p.R1174Q(0.55,573)
PERU_1	POST	274	58	none	ARID1A_c.4270C>T_p.Q1424*(0.57,209), TP53_c.210_211insG_p.V73fs*76(0.61,117)	CDK6_amplification(20+, exons 7 of 7), MCL1_amplification(7, exons 5 of 5), MET_amplification(20+, exons 20 of 20)	none	none	MTOR_c.3482G>A_p.R1161Q(0.27,271), BRCA1_c.2264A>C_p.E755A(0.52,363), ERBB2_c.1833G>A_p.M611I(0.41,291), FLT3_c.1774G>A_p.V592I(0.46,369)
PERU_11	POST	823	70	none	TP53_c.175_175delC_p.G59fs*64(0.81,815)	BRAF_amplification(10, exons 18 of 18), CCND2_amplification(7, exons 5 of 5), CCNE1_amplification(17, exons 10 of 10), JAK2_amplification(8, exons 23 of 23), KRAS_amplification(7, exons 5 of 5), MCL1_amplification(17, exons 5 of 5), MYC_amplification(17+, exons 5 of 5)	none	none	ABL2_c.1957C>T_p.R653C(0.51,760), FANCA_c.4037C>T_p.A1346V(0.69,582), IRS2_c.3001T>G_p.S1001A(0.16,1091), KDR_c.1040G>A_p.R347H(0.32,793), NTRK3_c.406A>C_p.S136R(0.82,677), PHLPP2_c.3416C>G_p.S1139C(0.63,593), PTCH2_c.1244G>A_p.R415Q(0.2,834)
PERU_54	POST	387	50	TP53_c.714T>A_p.C238*(0.5,323)	BRCA2_c.6024_6025insG_p.Q2009fs*9(0.34,748), LRP1B_c.9190C>T_p.R3064*(0.42,513)	CCNE1_amplification(8, exons 10 of 10), HOXA3_amplification(10, exons 4 of 5), JAK2_amplification(7, exons 22 of 23), MCL1_amplification(15, exons 5 of 5), MYC_amplification(11, exons 5 of 5)	none	none	APC_c.2750A>T_p.D917V(0.68,353), EPHB6_c.364G>A_p.G122S(0.67,429), INSR_c.4019C>T_p.A1340V(0.47,409), MLL_c.158c>T_p.A53V(0.23,113), NTRK1_c.2334C>A_p.H778Q(0.33,283), RARA_c.1336c>T_p.P446S(0.08,241), TNKS_c.1663_1668delAATAAA_p.N555_K556del(0.17,379)
PERU_81	POST	744	30	TP53_c.520A>T_p.R174W(0.25,529)	none	ERBB2_amplification(20+, exons 27 of 27), MCL1_amplification(8, exons 5 of 5)	none	none	ATR_c.6798G>A_p.M2266I(0.1,682), CYP2C8_c.370C>T_p.R124W(0.44,584), EPHA5_c.1051A>G_p.T351A(0.44,803), ERCC2_c.755C>A_p.T252N(0.56,494), FANCA_c.2291G>A_p.R764Q(0.43,168), FGFR4_c.1222G>A_p.G408S(0.46,648), FLT4_c.4006G>A_p.E1336K(0.57,420), PTPRD_c.1975C>A_p.P659T(0.68,915), TSC1_c.2899G>T_p.G967C(0.51,1234), TSC1_c.1760A>G_p.K587R(0.5,701)
PERU_57	POST	679	36	none	none	CDK4_amplification(9, exons 7 of 7), MCL1_amplification(20, exons 5 of 5), MYC_amplification(14, exons 5 of 5)	none	ETV6_NTRK3_truncation_311	ABCG2_c.410G>A_p.R137K(0.47,660), ALK_c.3542G>T_p.R1181L(0.47,613), JAK2_c.2359T>A_p.C787S(0.46,939), TSC1_c.1760A>G_p.K587R(0.44,570)
PERU_56	POST	986	38	none	TP53_c.559+1C>T_p.splice(0.38,741)	AKT1_amplification(10, exons 13 of 13), ERBB2_amplification(19, exons 27 of 27), JAK2_amplification(7, exons 23 of 23)	none	BRCA1_BRCA1_truncation_29, RB1_intergenicRegion_truncation_20	CEBPA_c.564_566delGGC_p.P189del(0.34,221), CTNNB1_c.1255T>C_p.C419R(0.34,1269), EGFR_c.2278C>T_p.L760F(0.69,1476), EGFR_c.3392C>T_p.T1131I(0.68,1362), GNAS_c.14A>G_p.N5S(0.46,1169), JAK1_c.2299T>G_p.S767A(0.14,1253), LRP1B_c.11417A>G_p.E3806G(0.11,1247), PLCG1_c.477G>T_p.K159N(0.45,1125), RUNX1_c.364G>C_p.G122R(0.15,1047), TET2_c.825T>G_p.N275K(0.48,885)
PERU_55	POST	865	30	TP53_c.380C>T_p.S127F(0.33,467)	FBXW7_c.2033C>G_p.S678*(0.21,541)	IGF1R_amplification(9, exons 21 of 21), RPTOR_amplification(9, exons 34 of 34), MCL1_amplification(11, exons 5 of 5)	none	ETV6_ETV6_rearrangement_18, NF1_intergenicRegion_truncation_109	ABL2_c.980C>G_p.P327R(0.06,1124), FGFR4_c.1426G>A_p.D476N(0.29,528), IGF2R_c.3655G>A_p.V1219I(0.38,822), JUN_c.776G>T_p.R259L(0.07,1021), MLL_c.158c>T_p.A53V(0.28,428), TSC1_c.1760A>G_p.K587R(0.33,629)
PERU_53	POST	514	70	TP53_c.764T>C_p.I255T(0.28,324)	none	AKT2_amplification(16, exons 13 of 13)	none	TSC1_TSC1_truncation_20	AR_c.173a>T_p.Q58L(0.12,240), DPYD_c.524C>G_p.S175W(0.55,542), FLT4_c.4061G>A_p.R1354H(0.46,572), MLL_c.158c>T_p.A53V(0.69,198), NF1_c.663G>T_p.W221C(0.16,606), SMAD4_c.396C>G_p.H132Q(0.35,800), UGT1A7_c.353A>T_p.D118V(0.12,346)
PERU_3	POST	940	84	none	none	MCL1_amplification(6, exons 5 of 5)	none	RB1_RB1_truncation_28	MLH1_c.1853A>C_p.K618T(0.93,1199), ATM_c.1447C>T_p.L483F(0.09,784), BCL6_c.953C>T_p.P318L(0.44,919), BRCA1_c.140G>T_p.C47F(0.94,1036), CDK8_c.844G>C_p.D282H(0.28,963), EGFR_c.1951G>T_p.V651L(0.33,1665), EPHA6_c.1470C>G_p.I490M(0.24,2015), EPHB6_c.803C>A_p.P268Q(0.29,639), FLT1_c.3422C>G_p.P1141R(0.29,1405), NKX2-1_c.68G>A_p.G23D(0.49,909), TP53_c.688_699delGTGGATGGTGGT_p.T230_H233del(0.81,554), T…
PERU_69	POST	414	61	TP53_c.824G>A_p.C275Y(0.76,479)	FLT3_c.2653+2A>G_p.splice(0.61,549)	KRAS_amplification(12, exons 5 of 5)	PIK3R1_loss(0, exons 15 of 17)	none	KIT_c.1621A>C_p.M541L(0.48,439), ATM_c.610G>A_p.G204R(0.5,828), ERBB3_c.835A>G_p.K279E(0.68,200), LRP1B_c.3991G>A_p.E1331K(0.43,281), MLL_c.158c>T_p.A53V(0.47,172), MUTYH_c.970C>T_p.Q324*(0.52,184), SMAD3_c.1202A>C_p.N401T(0.08,366)
PERU_38	POST	455	49	TP53_c.390_392delTTG_p.N131del(0.61,213)	none	BRAF_amplification(10, exons 18 of 18), CCND2_amplification(8, exons 5 of 5), CCNE1_amplification(15, exons 10 of 10), FGFR4_amplification(8, exons 16 of 16), IRS2_amplification(20+, exons 5 of 5), MDM4_amplification(8, exons 10 of 10), MYC_amplification(20+, exons 5 of 5), RICTOR_amplification(8, exons 39 of 39)	none	none	IDH1_c.532G>A_p.V178I(0.35,335), PIK3CG_c.2338C>G_p.P780A(0.39,701), TSC1_c.1760A>G_p.K587R(0.81,284)
PERU_26	POST	477	67	TP53_c.321C>G_p.Y107*(0.65,358)	none	CDK6_amplification(6, exons 7 of 7), RPTOR_amplification(6, exons 34 of 34)	none	none	CEBPA_c.568_569insGGTGCG_p.S190_H191insHP(0.43,101), GUCY1A2_c.621G>T_p.L207F(0.34,542), NF2_c.1045G>A_p.A349T(0.24,581), NOTCH1_c.5605G>A_p.A1869T(0.71,172), TOP1_c.2020G>A_p.V674I(0.7,719), TSC1_c.1760A>G_p.K587R(0.73,289)
PERU_65	POST	473	90	TP53_c.670G>T_p.E224*(0.49,495)	BRCA1_c.3689T>G_p.L1230*(0.74,528)	AKT2_amplification(7, exons 13 of 13), MCL1_amplification(13, exons 5 of 5)	PTEN_loss(0, exons 3 of 9)	none	ATM_c.5557G>A_p.D1853N(0.46,461), DDR2_c.2530G>C_p.E844Q(0.06,1282), IRS2_c.59_60insTTG_p.L20_N21insN(0.48,217), RICTOR_c.4279C>T_p.L1427F(0.07,765), SMAD3_c.425G>A_p.R142H(0.1,384), SUFU_c.943G>C_p.G315R(0.07,647)
PERU_64	POST	557	89	none	TP53_c.363_364delCA_p.V122fs*26(0.33,253)	AKT3_amplification(8, exons 14 of 14)	none	none	ATM_c.5557G>A_p.D1853N(0.49,683), LTK_c.1168C>T_p.Q390*(0.29,331), MLL_c.9557T>C_p.I3186T(0.48,867), NTRK1_c.53G>A_p.G18E(0.6,317)
PERU_62	POST	330	24	TP53_c.469G>T_p.V157F(0.25,261)	none	RPTOR_amplification(9, exons 34 of 34), AR_amplification(7, exons 8 of 9)	none	none	EPHB1_c.2582G>C_p.W861S(0.48,143), NTRK1_c.1040G>A_p.R347H(0.38,162), PKHD1_c.2140+1C>T_p.splice(0.1,186), RET_c.1783G>A_p.E595K(0.52,189), WT1_c.1103T>C_p.V368A(0.09,209)
PERU_68	POST	877	40	CDH1_c.377delC_p.P126fs*89(0.04,475), TP53_c.329G>C_p.R110P(0.26,552)	none	MCL1_amplification(9, exons 5 of 5), MYC_amplification(16, exons 5 of 5)	none	none	MSH2_c.965G>A_p.G322D(0.55,1271), BCL2L1_c.95A>G_p.E32G(0.35,897), CDH1_c.1541A>G_p.D514G(0.09,1036), CYP2C8_c.776_776delT_p.N259fs*10(0.52,995), ERBB3_c.1424G>A_p.R475Q(0.52,697), FGFR3_c.7G>A_p.A3T(0.16,217), FLT4_c.4083C>G_p.N1361K(0.21,389), INSR_c.697C>T_p.L233F(0.22,557), JAK2_c.1187T>C_p.I396T(0.49,1501), LTK_c.143C>T_p.A48V(0.49,492), MLL_c.9170C>G_p.S3057C(0.51,956), MSH2_c.1814T>C_p.V60…
PERU_58	POST	452	42	TP53_c.329G>C_p.R110P(0.47,312)	none	CCND3_amplification(8, exons 5 of 5), MCL1_amplification(18, exons 5 of 5)	none	none	ALK_c.741G>C_p.W247C(0.26,486), APC_c.3631A>G_p.M1211V(0.36,429), DOT1L_c.2408G>C_p.R803T(0.26,129), GPR124_c.1706C>T_p.P569L(0.54,185), JAK2_c.618C>A_p.Y206*(0.33,248), NTRK2_c.491A>T_p.E164V(0.39,795), PAX5_c.782C>A_p.T261N(0.17,200), PHLPP2_c.1816_1835delGCGGATGGTAAAGACTCCAG_p.E607fs*53(0.14,438), PRKDC_c.2230G>A_p.D744N(0.42,450), RARA_c.1385C>T_p.P462L(0.17,647), RB1_c.1861C>T_p.R621C(0.71,4…
PERU_45	POST	678	50	none	TP53_c.210_211insG_p.V73fs*76(0.4,406)	JAK2_amplification(7, exons 23 of 23)	none	none	none
PERU_50	POST	743	59	none	RUNX1_c.59-1C>T_p.splice(0.05,1071), TP53_c.673-2T>A_p.splice(0.54,442)	CCND2_amplification(11, exons 5 of 5), CCNE1_amplification(16, exons 10 of 10)	none	none	ATM_c.5557G>A_p.D1853N(0.07,740), CCND1_c.872G>A_p.R291Q(0.6,441), DOT1L_c.4120G>A_p.D1374N(0.28,596), GPR124_c.1219G>A_p.G407S(0.61,467), LTK_c.2166G>A_p.M722I(0.14,132), MCL1_c.143T>G_p.I48R(0.36,782), NTRK1_c.53G>A_p.G18E(0.37,711), PDGFRB_c.946G>A_p.V316M(0.1,283), SOX10_c.176_199delTGTCATCGTCCGCCTCGCCGTCCT_p.D60_K67del(0.15,717), TGFBR2_c.1691A>G_p.N564S(0.36,239), TSC1_c.1760A>G_p.K587R(0.6…
PERU_91	POST	679	30	none	none	IGF1R_amplification(8, exons 21 of 21), MCL1_amplification(10, exons 5 of 5)	none	none	NOTCH1_c.5572A>C_p.M1858L(0.57,378), PIK3R1_c.1390G>T_p.D464Y(0.05,1058), PKHD1_c.8872C>A_p.Q2958K(0.07,778), PKHD1_c.1709A>G_p.N570S(0.4,672), PTCH1_c.128_129insTCT_p.G43_E44insE(0.32,1139), PTCH2_c.735G>C_p.Q245H(0.46,452), PTEN_c.671T>G_p.I224R(0.31,761), TP53_c.721_744delCCGGTTCATGCCGCCCATGCAGGA_p.S241_R248del(0.18,797), TSC1_c.1760A>G_p.K587R(0.56,633)
PERU_80	POST	374	40	PTEN_c.697C>T_p.R233*(0.48,577), TP53_c.578A>T_p.H193L(0.36,378)	BRCA2_c.9734C>G_p.S3245*(0.09,598), PTPRD_c.3413+1C>A_p.splice(0.1,268), SMARCA4_c.4324A>T_p.K1442*(0.25,382)	CCND1_amplification(16, exons 5 of 5), CDK4_amplification(7, exons 7 of 7), MCL1_amplification(15, exons 5 of 5), MYC_amplification(9, exons 5 of 5)	none	none	ABL1_c.737G>T_p.G246V(0.3,475), ABL2_c.2278T>G_p.S760A(0.16,298), APC_c.317G>T_p.R106L(0.51,393), BRCA2_c.9716C>G_p.S3239C(0.09,626), DDR2_c.476T>G_p.I159S(0.13,283), EPHB6_c.487_488delAG_p.S163fs*160(0.13,338), ERBB2_c.3568G>A_p.A1190T(0.08,474), FANCA_c.527C>T_p.S176F(0.39,367), JAK1_c.2956C>T_p.Q986*(0.1,598), LRP1B_c.7880A>G_p.N2627S(0.19,259), PHLPP2_c.1440T>G_p.F480L(0.08,204), PIK3CA_c.269…
PERU_27	POST	811	50	TP53_c.422G>A_p.C141Y(0.31,480)	none	FGFR2_amplification(20+, exons 19 of 19)	none	none	NTRK1_c.1777C>T_p.R593W(0.16,301), ATM_c.2456G>A_p.C819Y(0.73,926), ERBB3_c.1163G>A_p.R388Q(0.48,773), FLT1_c.35G>A_p.C12Y(0.4,525), MLL_c.158c>T_p.A53V(0.74,125), MRE11A_c.913C>T_p.R305W(0.59,1178), TSC2_c.583A>G_p.I195V(0.4,970), TSC2_c.3521G>A_p.R1174Q(0.37,523)
PERU_4	POST	354	49	TP53_c.747G>T_p.R249S(0.48,276)	none	AKT3_amplification(8, exons 14 of 14), JAK2_amplification(9, exons 23 of 23), KDR_amplification(7, exons 30 of 30), KIT_amplification(7, exons 20 of 21), MCL1_amplification(9, exons 5 of 5)	none	none	BCL2L1_c.76C>G_p.Q26E(0.43,341), BRCA2_c.6714_6716delTGA_p.D2238del(0.73,388), LTK_c.471C>A_p.Y157*(0.11,140), PRKDC_c.11813C>T_p.S3938L(0.54,362), RET_c.209A>G_p.Q70R(0.84,223)
PERU_15	POST	557	69	TP53_c.711G>T_p.M237I(0.77,401)	PIK3R1_c.1717_1745delCTGAGAAAGACGAGAGACCAATACTTGATG_p.L573fs*19(0.24,968)	MYC_amplification(9, exons 5 of 5)	none	none	CCND2_c.386A>G_p.N129S(0.47,295), FGFR2_c.362T>C_p.M121T(0.28,593), KDR_c.1598T>G_p.V533G(0.37,656), PRKDC_c.4944C>G_p.Y1648*(0.39,676), TNFAIP3_c.940G>A_p.V314I(0.48,932), USP9X_c.7467G>T_p.E2489D(0.65,316)
PERU_6	POST	193	38	TP53_c.625_626delAG_p.R209fs*6(0.75,408)	none	very low coverage, copy number not analyzed	very low coverage, copy number not analyzed	none	CEBPA_c.568_569insGGTGCG_p.S190_H191insHP(0.23,56), DOT1L_c.2182C>T_p.R728W(0.47,75), LRP1B_c.11309G>A_p.S3770N(0.62,224), PIK3R1_c.1700_1711delAACCAGACCTTA_p.K567_L570del(0.53,375), TGFBR2_c.1159G>A_p.V387M(0.26,173)
PERU_105	POST	529	88	FBXW7_c.1435C>T_p.R479*(0.25,499)	TP53_c.428_440delACCCACAGCTGCA_p.Q144fs*22(0.22,581)	none	none	none	BCL6_c.1327G>A_p.A443T(0.33,854), BRCA1_c.3692T>C_p.F1231S(0.72,636), EPHA3_c.1864T>A_p.S622T(0.53,448), EPHA3_c.2512G>T_p.D838Y(0.21,362), HSP90AA1_c.1093_1094insTTTCTT_p.E365_E366insEK(0.4,534), IKZF1_c.1075C>G_p.P359A(0.45,277), RET_c.1529C>T_p.A510V(0.47,369), TSC1_c.1760A>G_p.K587R(0.31,465)
PERU_17	POST	295	60	TP53_c.422G>A_p.C141Y(0.79,227)	none	MCL1_amplification(14, exons 5 of 5), MYC_amplification(11, exons 5 of 5)	none	ERBB4_C5orf42_fusion_23	ATM_c.815A>G_p.N272S(0.53,686), ATM_c.7521C>A_p.D2507E(0.34,647), CEBPA_c.564_566delGGC_p.P189del(0.09,159), EZH2_c.493T>G_p.F165V(0.31,516), PTPRD_c.4647G>A_p.M1549I(0.36,458)
PERU_46	POST	656	66	none	KDM6A_c.641_642insT_p.L214fs*3(0.66,932), TP53_c.756_757insT_p.T253fs*11(0.65,555)	MCL1_amplification(7, exons 5 of 5)	PTEN_loss(0, exons 1 of 9)	none	CEBPA_c.564_566delGGC_p.P189del(0.3,174), EGFR_c.2463C>G_p.I821M(0.36,710), IGF1R_c.26C>T_p.S9F(0.26,474), LRP1B_c.7289G>A_p.R2430Q(0.45,777), MYCL1_c.53C>G_p.P18R(0.14,36), MYCN_c.1049T>C_p.I350T(0.25,696), PKHD1_c.7675G>C_p.V2559L(0.29,545), TSC1_c.1760A>G_p.K587R(0.82,591)
PERU_49	POST	172	23	none	none	very low coverage, copy number not analyzed	very low coverage, copy number not analyzed	none	BRCA1_c.5215G>C_p.D1739H(0.69,165), EPHA3_c.821G>C_p.R274P(0.62,170), MCL1_c.161G>C_p.R54T(0.45,351), RAF1_c.841A>T_p.I281F(0.62,178)
PERU_111	POST	185	45	EGFR_c.340G>A_p.E114K(0.02,5587), PIK3CA_c.1633G>A_p.E545K(0.63,277), TP53_c.818G>A_p.R273H(0.49,187)	none	very low coverage, copy number not analyzed	very low coverage, copy number not analyzed	none	ATM_c.5557G>A_p.D1853N(0.38,208), CHEK2_c.410g>C_p.R137T(0.05,186), KDM6A_c.3329T>C_p.V1110A(0.24,193), MLL_c.158c>T_p.A53V(0.65,31), MRE11A_c.1195T>C_p.F399L(0.43,352), SMAD2_c.956T>C_p.V319A(0.27,190), TSC1_c.1760A>G_p.K587R(0.46,153)
PERU_47	POST	330	60	ATM_c.1010G>A_p.R337H(0.24,607), TP53_c.763A>T_p.I255F(0.59,199)	none	MCL1_amplification(11, exons 5 of 5)	none	none	CDH5_c.1123C>G_p.P375A(0.45,356), EPHB4_c.1372C>T_p.R458W(0.55,185), IGF2R_c.2566G>A_p.G856S(0.11,323), JAK1_c.72G>C_p.K24N(0.08,399), MAP2K2_c.22G>A_p.V8M(0.12,117)
PERU_30	POST	538	79	TP53_c.395A>G_p.K132R(0.83,270)	RB1_c.1240_1241insA_p.S414fs*14(0.81,491)	ARFRP1_amplification(7, exons 6 of 6), AURKA_amplification(7, exons 8 of 8), MYC_amplification(11, exons 5 of 5), LRP6_amplification(8, exons 23 of 23)	none	none	ATM_c.5633C>T_p.S1878L(0.93,367), FGFR4_c.1405G>C_p.A469P(0.42,197), INHBA_c.172G>A_p.V58I(0.42,391), LRP1B_c.12565C>T_p.P4189S(0.3,680), MLL_c.158c>T_p.A53V(0.95,317), MSH2_c.62G>T_p.R21L(0.32,329), PDGFRA_c.1547T>G_p.L516R(0.24,513)
PERU_31	POST	663	32	none	TP53_c.450_451insGG_p.P153fs*18(0.38,510)	EPHA3_amplification(10, exons 17 of 17), MCL1_amplification(11, exons 5 of 5), PIK3CA_amplification(12, exons 20 of 20), SRC_amplification(9, exons 11 of 11)	CDKN2A_loss(0, exons 6 of 6), CDKN2B_loss(0, exons 4 of 4), NF1_loss(0, exons 34 of 59), PTEN_loss(0, exons 5 of 9)	NF1_intergenicRegion_truncation_20	PDGFRB_c.3287C>T_p.A1096V(0.69,245), NOTCH1_c.5800C>A_p.L1934M(0.06,368), PDGFRB_c.390T>A_p.N130K(0.28,608)
PERU_20	POST	282	60	TP53_c.637C>T_p.R213*(0.49,278)	BRCA1_c.2341_2342insT_p.S782fs*8(0.76,448), CTNNB1_c.1364_1386delGTGACAGGGAAGACATCACTGAG_p.G455fs*34(0.1,411)	CCND1_amplification(20+, exons 5 of 5), MYC_amplification(13, exons 5 of 5), MCL1_amplification(13, exons 5 of 5)	none	none	ATM_c.1351C>T_p.R451C(0.67,320), GNAS_c.1049C>T_p.T350I(0.27,171), HOXA3_c.260_261insGGCGGGTGCAGGGGCGGC_p.E87_P88insPPLHPP(0.31,149), IGF2R_c.2566G>A_p.G856S(0.52,179), IGF2R_c.4842C>A_p.C1614*(0.15,157), NTRK2_c.925G>C_p.G309R(0.1,254), PTCH2_c.3415G>A_p.G1139S(0.28,170)
PERU_9	POST	131	40	TP53_c.916C>T_p.R306*(0.34,80)	none	very low coverage, copy number not analyzed	very low coverage, copy number not analyzed	none	APC_c.1335G>C_p.Q445H(0.05,211), CDKN2A_c.260G>C_p.R87T(0.12,281), IGF2R_c.2566G>A_p.G856S(0.68,95), JAK3_c.843G>C_p.W281C(0.4,30), KDR_c.248T>C_p.L83P(0.09,172), LRP1B_c.201T>A_p.D67E(0.28,172), MAP2K2_c.881T>C_p.I294T(0.11,91), MLL_c.158c>T_p.A53V(0.69,13), MSH6_c.3149C>A_p.A1050D(0.06,270), PLCG1_c.283G>C_p.E95Q(0.17,184), TSC1_c.1760A>G_p.K587R(0.3,89)
PERU_18	POST	252	80	PIK3CA_c.3140A>T_p.H1047L(0.71,819), TP53_c.638G>T_p.R213L(0.69,178)	NF1_c.6675G>A_p.W2225*(0.8,360), PTPRD_c.5534+0insAAGAAACACCACCACTTATCACTGCTTTATTCACAAATGGAAACTTAC_p.splice(0.09,205)	RAF1_amplification(10, exons 16 of 16)	none	none	MCL1_c.431T>C_p.L144P(0.52,236), MET_c.1381C>T_p.R461C(0.48,299), PKHD1_c.7543G>A_p.A2515T(0.38,369), TET2_c.5851C>T_p.R1951W(0.81,175), TP53_c.641A>C_p.H214P(0.68,178), TSC1_c.1760A>G_p.K587R(0.5,211), TSC2_c.2962C>T_p.R988C(0.51,110)
PERU_42	POST	141	50	PIK3CA_c.1258T>C_p.C420R(0.85,144), TP53_c.524G>A_p.R175H(0.78,87)	none	very low coverage, copy number not analyzed	very low coverage, copy number not analyzed	none	ATM_c.5557G>A_p.D1853N(0.3,139), IDH2_c.1302_1310delAAGTCCGTG_p.T435_F437del(0.1,135), JAK2_c.2693A>G_p.E898G(0.63,65), LRP1B_c.2377C>A_p.Q793K(0.94,125), PHLPP2_c.1358A>G_p.D453G(0.9,156), RUNX1_c.136G>A_p.A46T(0.59,69)
PERU_14	POST	467	40	TP53_c.991C>T_p.Q331*(0.53,645)	none	CRKL_amplification(20, exons 5 of 5)	none	none	DOT1L_c.4313T>G_p.L1438R(0.41,508), EPHA7_c.640A>G_p.I214V(0.37,602), GNAS_c.163C>T_p.H55Y(0.5,307), LRP1B_c.4927G>C_p.V1643L(0.34,276), LRP6_c.1577T>A_p.V526E(0.41,544), MLL_c.158c>T_p.A53V(0.56,154), SUFU_c.1433T>C_p.V478A(0.24,371), TET2_c.825T>G_p.N275K(0.26,375)
PERU_71	POST	493	69	none	BRCA1_c.2703_2706delTTCA_p.E902fs*97(0.81,360), BRCA1_c.2648_2661delGGCAGAGAATGTTG_p.T884fs*14(0.21,541), TP53_c.794_795insC_p.R267fs*5(0.75,394)	FGFR2_amplification(20+, exons 19 of 19), MYC_amplification(10, exons 5 of 5)	none	none	EPHB6_c.2891G>A_p.C964Y(0.56,779), ERBB2_c.568C>T_p.R190W(0.89,369), KDR_c.2022G>C_p.E674D(0.63,364), LRP1B_c.8471G>T_p.C2824F(0.06,361), MEN1_c.1496C>T_p.P499L(0.45,591)
PERU_41	POST	924	79	TP53_c.725G>A_p.C242Y(0.89,1369)	BRCA2_c.6352_6353delGT_p.V2118fs*10(0.54,259), PTEN_c.210_213_-79delATGTTTGTTAGTATTAGTACTTTTTTTTCTTCCTAAGTGCAAAAGATAACTTTATATCACTTTTAAACTTTTCTTTTAGTTGT_p.C71fs*27,splice(0.29,784)	none	none	none	KIT_c.1621A>C_p.M541L(0.48,1234), BRCA2_c.6350_6358delGTGTAAACT_p.C2117_N2119del(0.59,723), CDH2_c.1406C>A_p.P469Q(0.41,1034), EZH2_c.647G>A_p.R216Q(0.83,752), FBXW7_c.232G>A_p.E78K(0.14,477), NF2_c.1022G>A_p.R341Q(0.48,661), PTPRD_c.5527C>T_p.H1843Y(0.17,1034), RPTOR_c.1864G>A_p.A622T(0.1,326), TSC1_c.1760A>G_p.K587R(0.93,1049), USP9X_c.2983A>T_p.S995C(0.51,1217)
PERU_67	POST	984	63	TP53_c.470T>G_p.V157G(0.68,685)	none	CCND2_amplification(9, exons 5 of 5), MCL1_amplification(8, exons 5 of 5), MYC_amplification(7, exons 5 of 5)	RB1_loss(0, exons 26 of 27)	none	ATM_c.5557G>A_p.D1853N(0.16,872), APC_c.2642C>T_p.S881F(0.14,1085), HOXA3_c.1219G>A_p.G407S(0.39,311), JAK1_c.1390G>A_p.V464M(0.84,945), MSH2_c.815C>T_p.A272V(0.53,963), NOTCH1_c.2495C>T_p.P832L(0.14,578), SOX10_c.1237_1250delTGGCCCGAGTGGCC_p.H414fs*23(0.13,2129), TSC2_c.1070C>T_p.A357V(0.86,730)
PERU_75	POST	1215	89	TP53_c.797G>A_p.G266E(0.33,1024)	none	none	none	none	KIT_c.1621A>C_p.M541L(0.51,1622), BRCA1_c.5501C>T_p.T1834I(0.35,1032), BRCA1_c.140G>T_p.C47F(0.65,1257), CEBPA_c.568_569insGGTGCG_p.S190_H191insHP(0.29,187), PHLPP2_c.1570G>T_p.A524S(0.66,1273), SMAD4_c.964T>C_p.Y322H(0.49,893)
PERU_35	POST	630	30	PIK3CA_c.1624G>A_p.E542K(0.61,1282), RET_c.2410G>A_p.V804M(0.48,184), TP53_c.844C>G_p.R282G(0.24,577)	none	ERBB2_amplification(16, exons 27 of 27), IKBKE_amplification(16, exons 20 of 20)	none	none	PTCH1_c.3583A>T_p.T1195S(0.32,454), ATM_c.1595G>A_p.C532Y(0.48,714), FGFR4_c.2185G>A_p.G729R(0.58,532), HSP90AA1_c.1093_1094insTTTCTT_p.E365_E366insEK(0.35,537), PDGFRB_c.499G>A_p.V167I(0.4,552), TET2_c.4589_4618delCTCTACAGAAGCAGCCACCACAGCCCCAGC_p.P1530_Q1540>Q(0.21,457), TNKS2_c.2698A>T_p.T900S(0.49,561), TSC1_c.1760A>G_p.K587R(0.53,593)
PERU_10	PRE	506	60	PIK3CA_c.3140A>G_p.H1047R(0.34,538), PTEN_c.733C>T_p.Q245*(0.52,421), RB1_c.1072C>T_p.R358*(0.58,486), TP53_c.1015G>T_p.E339*(0.61,418)	RUNX1_c.363_364insCC_p.D123fs*11(0.3,460)	none	NF1_loss(0, exons 1 of 59)	none	ALK_c.1842G>T_p.W614C(0.25,603), DOT1L_c.994C>T_p.P332S(0.28,694), DOT1L_c.4129G>A_p.A1377T(0.48,870), EPHA6_c.189a>C_p.E63D(0.44,722), MSH2_c.1166G>A_p.R389Q(0.47,501), TSC1_c.1760A>G_p.K587R(0.51,395), TSC2_c.3520C>T_p.R1174W(0.5,668)
PERU_31	PRE	172	53	none	TP53_c.450_451insGG_p.P153fs*18(0.54,279)	very low coverage, copy number not analyzed	very low coverage, copy number not analyzed	none	PDGFRB_c.390T>A_p.N130K(0.25,130)
PERU_66	PRE	118	90	ATM_c.1010G>A_p.R337H(0.38,119), PIK3CA_c.3140A>G_p.H1047R(0.34,123), TP53_c.1025G>C_p.R342P(0.38,127)	none	very low coverage, copy number not analyzed	very low coverage, copy number not analyzed	none	CARD11_c.1553G>A_p.R518Q(0.51,97), CEBPA_c.568_569insGGTGCG_p.S190_H191insHP(0.42,78), EPHB1_c.2282C>T_p.S761F(0.35,37), EPHB6_c.678_679insG_p.L227fs*97(0.21,105), IKBKE_c.1613G>A_p.R538K(0.52,129), IKBKE_c.1686G>A_p.M562I(0.15,164), LTK_c.2019-2T>C_p.splice(0.53,152), PKHD1_c.640C>A_p.Q214K(0.6,78), TSC1_c.1760A>G_p.K587R(0.59,126)
PERU_72	PRE	246	40	PIK3CA_c.3140A>G_p.H1047R(0.22,256)	CDH1_c.1937_1956delCTTTCTCCAGCCCAAGAATCTATCATTTTG_p.splice(0.08,245)	MCL1_amplification(16, exons 5 of 5), MYC_amplification(11, exons 5 of 5), AKT1_amplification(7, exons 13 of 13)	none	RB1_RB1_truncation_19	PTCH1_c.3583A>T_p.T1195S(0.45,313), APC_c.1899A>C_p.E633D(0.1,174), ATM_c.390T>A_p.D130E(0.61,290), CEBPA_c.568_569insGGTGCG_p.S190_H191insHP(0.52,229), DOT1L_c.3765G>T_p.K1255N(0.35,406), FLT1_c.35G>A_p.C12Y(0.41,300), PKHD1_c.3637A>T_p.I1213F(0.46,157)
PERU_19	PRE	477	60	TP53_c.844C>T_p.R282W(0.59,482)	BRCA1_c.3406_3406delG_p.P1136fs*19(0.61,474), MSH6_c.496_496delT_p.Y166fs*8(0.24,379)	MCL1_amplification(11, exons 5 of 5), MYC_amplification(9, exons 5 of 5), MYCL1_amplification(15, exons 5 of 5), AKT3_amplification(7,exons 14 of 14)	LRP1B_loss(0, exons 21 of 91), PTEN_loss(0, exons 9 of 9)	none	IRS2_c.3425G>C_p.G1142A(0.1,620), MYC_c.859G>A_p.A287T(0.12,962), TSC1_c.1760A>G_p.K587R(0.17,425)
PERU_41	PRE	490	40	PTEN_c.195C>G_p.Y65*(0.01,609), TP53_c.725G>A_p.C242Y(0.45,527)	BRCA2_c.6352_6353delGT_p.V2118fs*10(0.67,482), PTEN_c.210_213_-79delATGTTTGTTAGTATTAGTACTTTTTTTTCTTCCTAAGTGCAAAAGATAACTTTATATCACTTTTAAACTTTTCTTTTAGTTGT_p.C71fs*27,splice(0.06,1098)	MCL1_amplification(16, exons 5 of 5)	none	none	EZH2_c.647G>A_p.R216Q(0.69,380), FBXW7_c.232G>A_p.E78K(0.3,315), NF2_c.1022G>A_p.R341Q(0.49,411), PTPRD_c.5527C>T_p.H1843Y(0.12,273), RPTOR_c.1864G>A_p.A622T(0.16,561), TSC1_c.1760A>G_p.K587R(0.77,523), USP9X_c.2983A>T_p.S995C(0.55,545)
PERU_53	PRE	292	50	TP53_c.764T>C_p.I255T(0.38,251)	none	AKT2_amplification(16, exons 13 of 13), MCL1_amplification(8, exons 5 of 5)	none	TSC1_TSC1_truncation_14	DPYD_c.524C>G_p.S175W(0.16,476), EPHA6_c.425G>A_p.G142E(0.3,536), FLT4_c.4061G>A_p.R1354H(0.62,277), MLL_c.158c>T_p.A53V(0.77,83), NF1_c.663G>T_p.W221C(0.2,430), NKX2-1_c.29C>G_p.P10R(0.24,162), SMAD3_c.591C>A_p.N197K(0.16,275), SMAD4_c.396C>G_p.H132Q(0.24,362), TNKS_c.1493G>C_p.R498T(0.46,231), UGT1A7_c.353A>T_p.D118V(0.25,165), CEBPA_c.564_566delGGC_p.P188del(0.44,235)
PERU_5	PRE	151	80	ATM_c.7328G>A_p.R2443Q(0.61,70), TP53_c.490A>G_p.K164E(0.73,143)	none	very low coverage, copy number not analyzed	very low coverage, copy number not analyzed	none	AKT2_c.212A>G_p.N71S(0.56,255), CD79A_c.419C>A_p.T140N(0.2,126), CEBPA_c.568_569insGGTGCG_p.S190_H191insHP(0.38,146), CHEK2_c.1510G>C_p.E504Q(0.17,78), JAK2_c.3082G>T_p.E1028*(0.62,184), MTOR_c.1145A>G_p.N382S(0.58,206), NOTCH1_c.3011C>T_p.S1004L(0.14,87)
PERU_11	PRE	288	80	none	TP53_c.175_175delC_p.G59fs*64(0.9,438)	BRAF_amplification(10, exons 18 of 18), CCNE1_amplification(18, exons 10 of 10), KRAS_amplification(7, exons 5 of 5), MCL1_amplification(18, exons 5 of 5), MYC_amplification(20+, exons 5 of 5)	none	none	ABL2_c.1957C>T_p.R653C(0.62,266), FANCA_c.4037C>T_p.A1346V(0.6,240), IRS2_c.3001T>G_p.S1001A(0.21,359), KDR_c.1040G>A_p.R347H(0.28,286), NTRK3_c.406A>C_p.S136R(0.9,149), PHLPP2_c.3416C>G_p.S1139C(0.6,297), PTCH2_c.1244G>A_p.R415Q(0.2,407)
PERU_28	PRE	610	70	RUNX1_c.460C>T_p.Q154*(0.25,1159), TP53_c.641A>G_p.H214R(0.42,600)	none	none	none	none	DDR2_c.1034C>A_p.A345D(0.24,949), IRS2_c.2707A>G_p.S903G(0.15,804), PLCG1_c.3649_3651delGAG_p.E1217del(0.44,250), RPTOR_c.493_501delTGGGTCTTC_p.W165_F167del(0.25,401)
PERU_57	PRE	164	21	none	none	very low coverage, copy number not analyzed	very low coverage, copy number not analyzed	ETV6_NTRK3_truncation_15	ABCG2_c.410G>A_p.R137K(0.48,163), ALK_c.3542G>T_p.R1181L(0.43,150), JAK2_c.2359T>A_p.C787S(0.53,177), PTCH1_c.131a>G_p.E44G(0.05,220), TSC1_c.1760A>G_p.K587R(0.61,118), CEBPA_c.564_566delGGC_p.P189del(0.28,108)
PERU_58	PRE	342	50	NOTCH1_c.4724T>C_p.L1575P(0.03,549), TP53_c.329G>C_p.R110P(0.55,317)	none	CCND3_amplification(7, exons 5 of 5), CDK4_amplification(6, exons 7 of 7), MCL1_amplification(15, exons 5 of 5), MDM2_amplification(6, exons 11 of 11), PIK3CA_amplification(7, exons 20 of 20)	none	none	ALK_c.741G>C_p.W247C(0.28,301), APC_c.3631A>G_p.M1211V(0.27,262), DOT1L_c.2408G>C_p.R803T(0.21,161), GPR124_c.1706C>T_p.P569L(0.54,301), JAK2_c.618C>A_p.Y206*(0.38,216), NTRK2_c.491A>T_p.E164V(0.41,460), PAX5_c.782C>A_p.T261N(0.18,255), PHLPP2_c.1816_1835delGCGGATGGTAAAGACTCCAG_p.E607fs*53(0.17,383), PRKDC_c.2230G>A_p.D744N(0.38,374), RARA_c.1385C>T_p.P462L(0.18,603), RB1_c.1861C>T_p.R621C(0.71,3…
PERU_65	PRE	459	40	TP53_c.670G>T_p.E224*(0.48,478)	BRCA1_c.3689T>G_p.L1230*(0.7,427)	MCL1_amplification(8, exons 5 of 5)	PTEN_loss(0, exons 9 of 9)	none	ATM_c.5557G>A_p.D1853N(0.44,362), IRS2_c.59_60insTTG_p.L20_N21insN(0.42,363), RICTOR_c.4279C>T_p.L1427F(0.16,502)
PERU_68	PRE	356	50	TP53_c.329G>C_p.R110P(0.1,402)	none	MYC_amplification(11, exons 5 of 5), MCL1_amplification(7, exons 5 of 5)	none	none	MSH2_c.965G>A_p.G322D(0.48,390), BCL2L1_c.95A>G_p.E32G(0.5,546), CYP2C8_c.776_776delT_p.N259fs*10(0.48,263), ERBB3_c.1424G>A_p.R475Q(0.53,278), FLT4_c.4083C>G_p.N1361K(0.31,303), INSR_c.697C>T_p.L233F(0.08,622), JAK2_c.1187T>C_p.I396T(0.46,483), LTK_c.143C>T_p.A48V(0.47,459), MLL_c.9170C>G_p.S3057C(0.5,284), MSH2_c.1814T>C_p.V605A(0.55,313), MTHFR_c.1333C>T_p.R445W(0.53,427)
PERU_82	PRE	161	31	TP53_c.584T>C_p.I195T(0.28,154)	BRCA1_c.3757_3758delGA_p.S1253fs*1(0.7,189)	very low coverage, copy number not analyzed	very low coverage, copy number not analyzed	none	BCL6_c.702T>G_p.S234R(0.18,174), IDH1_c.677T>A_p.I226N(0.21,160), IRS2_c.17g>A_p.R6Q(0.47,173), LRP6_c.970A>G_p.K324E(0.54,125), TNKS2_c.2519G>C_p.S840T(0.26,152), TSC1_c.1760A>G_p.K587R(0.5,147)
PERU_15	PRE	316	40	TP53_c.711G>T_p.M237I(0.6,234)	none	MCL1_amplification(11, exons 5 of 5), MYC_amplification(15, exons 5 of 5), RAF1_amplification(11, exons 16 of 16), RPTOR_amplification(10, exons 34 of 34)	none	none	CCND2_c.386A>G_p.N129S(0.55,160), FGFR2_c.362T>C_p.M121T(0.28,286), KDR_c.1598T>G_p.V533G(0.32,340), PRKDC_c.4944C>G_p.Y1648*(0.38,347), TNFAIP3_c.940G>A_p.V314I(0.43,467), USP9X_c.7467G>T_p.E2489D(0.43,162)
PERU_38	PRE	108	31	none	none	very low coverage, copy number not analyzed	very low coverage, copy number not analyzed	none	IDH1_c.532G>A_p.V178I(0.46,82), EPHB6_c.513_518delCTCCTC_p.S171_S172del(0.09,184), NKX2-1_c.702_703insCCCGCCGCC_p.G264_G265insGGG(0.24,97), NOTCH1_c.1298T>G_p.L433R(0.06,194), PIK3CG_c.2338C>G_p.P780A(0.36,162), TP53_c.390_392delTTG_p.N131del(0.49,154), TSC1_c.1760A>G_p.K587R(0.69,67)
PERU_59	PRE	393	40	TP53_c.438G>A_p.W146*(0.4,512)	none	MCL1_amplification(15, exons 5 of 5), MYC_amplification(20+, exons 5 of 5)	none	none	ATR_c.556A>G_p.M186V(0.48,551), PRKDC_c.7441A>G_p.M2481V(0.2,902), TET2_c.825T>G_p.N275K(0.36,276)
PERU_81	PRE	289	40	TP53_c.520A>T_p.R174W(0.56,201)	none	ERBB2_amplification(20+, exons 27 of 27)	none		CYP2C8_c.370C>T_p.R124W(0.33,223), EPHA3_c.1744C>G_p.H582D(0.19,401), EPHA5_c.1051A>G_p.T351A(0.53,266), ERCC2_c.755C>A_p.T252N(0.5,270), FANCA_c.2291G>A_p.R764Q(0.36,146), FGFR4_c.1222G>A_p.G408S(0.6,318), FLT4_c.4006G>A_p.E1336K(0.37,251), PTPRD_c.1975C>A_p.P659T(0.84,209), TSC1_c.2899G>T_p.G967C(0.57,557), TSC1_c.1760A>G_p.K587R(0.56,378)
PERU_62	PRE	476	40	TP53_c.469G>T_p.V157F(0.43,791)	none	IGF1R_amplification(8, exons 21 of 21), RPTOR_amplification(12, exons 34 of 34), AR_amplification(11, exons 9 of 9), MCL1_amplification(11, exons 5 of 5)	none	RUNX1_RUNX1_truncation_33, NF1_PUM1_truncation_52	EPHB1_c.2582G>C_p.W861S(0.49,312), NTRK1_c.1040G>A_p.R347H(0.38,526), PKHD1_c.2140+1C>T_p.splice(0.22,271), RET_c.1783G>A_p.E595K(0.61,533)

## Sheet: Supplemental Table 4
	Post-NAC TNBC with alterations (%)	Analyzable sample size (N)	TCGA PAM50 Basal-like with alterations (%) (N=81)	Fisher's Exact p-value (two-tailed)
TP53	89.1892	74	85	0.48
MCL1	54.4118	68	19	0.0006
MYC	35.2941	68	32	0.7293
PIK3CA	12.1622	74	14	0.8156
PTEN	16.2162	74	6	0.0697
RB1	10.8108	74	11	1
BRCA1	10.8108	74	12	0.8
JAK2	10.2941	68	2	0.08
CDKN2A	9.45946	74	11	0.7964
NF1	6.75676	74	2	0.2596
KRAS	7.35294	68	6	1
CCND1	5.88235	68	2	0.4123
AKT3	7.35294	68	14	0.2912
EGFR	4.41176	68	2.5	0.66
CCND2	5.88235	68	5	1
CCND3	5.88235	68	2	0.42
IGF1R	5.88235	68	2	0.42
CDK6	5.88235	68	1	0.1784
CCNE1	5.88235	68	9	0.7547

## Sheet: Supplemental Table 5
	PERU_1	PERU_2	PERU_3	PERU_5	PERU_7	PERU_8	PERU_9	PERU_11	PERU_12	PERU_13	PERU_14	PERU_16	PERU_17	PERU_18	PERU_19	PERU_20	PERU_22	PERU_24	PERU_26	PERU_27	PERU_29	PERU_30	PERU_33	PERU_34	PERU_35	PERU_36	PERU_38	PERU_39	PERU_40	PERU_43	PERU_44	PERU_45	PERU_46	PERU_47	PERU_48	PERU_49	PERU_50	PERU_51	PERU_52	PERU_54	PERU_55	PERU_56	PERU_57	PERU_58	PERU_59	PERU_60	PERU_61	PERU_62	PERU_63
ABAT	-5.40016	-5.76378	-4.76897	-1.73825	-5.71196	-1.35411	-2.92411	-2.33344	-5.80212	-5.37271	-1.4118	-2.38969	-0.537916	-4.61128	-6.50134	-3.12567	-3.78661	-5.30022	-3.11286	-4.69331	-1.83365	-1.73669	-5.97442	-1.57673	-6.98977	-5.15098	-4.54844	-5.40435	-3.90874	-3.92768	-0.85094	-0.603644	-7.07598	-5.60472	-5.681	-6.95608	-7.76364	-4.97475	-2.5438	-5.19662	-6.40767	-6.36516	-5.03127	-7.35998	-5.43069	-3.0382	-6.79942	-3.46505	-7.01482
ABTB2	-1.94073	0.0435757	-0.862082	-1.33615	-5.71196	-0.753717	-1.15404	1.03824	-0.409803	-0.243423	-0.949619	-1.46593	0.160011	0.295615	-1.33142	-1.96033	-0.580938	-1.21276	0.410705	1.33644	-0.248689	-1.73669	-2.8045	-2.73427	-2.18241	1.32475	-0.300508	-5.40435	-1.33209	-1.23736	-0.481159	-1.22197	-0.666591	-0.4348	-2.87365	-2.43251	-2.47824	-0.389792	-2.5438	0.869472	-1.40767	-0.195232	-1.62527	-1.57862	-1.43069	-1.76256	-1.75502	-5.78698	-6.01482
ACOT4	-1.00784	0.0435757	-3.76897	-0.362383	-5.71196	-0.45864	-0.920895	-0.927927	-2.80212	0.735819	-1.4118	-3.72227	-0.265123	0.710653	-1.33142	-1.6039	-0.469346	-2.49287	-1.23839	-5.27827	-0.940567	-1.73669	-4.97442	-1.91115	-1.28933	-3.56602	-4.54844	1.1655	-0.270863	-1.23736	0.0540637	1.12505	-1.61655	-5.60472	-5.681	-3.14872	-1.71925	-2.38979	-1.10086	-5.19662	-6.40767	-1.7213	-2.06779	-3.35998	-5.43069	-0.90242	-1.75502	-2.78698	-5.01482
ACOX2	-5.40016	-4.17882	-4.76897	-1.73825	-5.71196	-1.60787	-0.541642	-1.26345	-5.80212	-5.37271	-1.4118	-2.38969	-1.30345	-4.61128	-2.33142	-1.31831	-0.469346	-3.71526	-5.69782	-3.95634	-0.734116	-1.40864	-5.97442	-3.11278	-2.81984	-5.15098	-4.54844	-4.40435	-1.10851	-3.92768	-0.188868	-0.783392	-2.82805	-5.60472	-5.681	-6.95608	-2.47824	-4.97475	-2.11754	-5.19662	-6.40767	-3.36516	-4.03127	-4.55262	-5.43069	-1.94627	-2.47749	-4.20201	-7.01482
ACSBG1	-5.40016	-5.76378	-4.76897	-2.29768	-5.71196	-1.12508	-1.15404	-0.0560662	-5.80212	-5.37271	-1.59439	-2.89219	-1.9335	-4.61128	-4.91638	-4.55451	-1.14835	-5.30022	-5.69782	-6.27827	-0.734116	-4.12135	-5.97442	-2.73427	-4.98977	-5.15098	-4.54844	-5.40435	-2.34045	-1.63222	-3.82293	-0.447525	-5.49102	-5.60472	-5.681	-6.95608	-7.76364	-4.97475	-1.95884	-2.38926	-6.40767	-6.36516	-7.35319	-7.35998	-5.43069	-8.28612	-6.79942	-5.78698	-7.01482
ACSM5	-5.40016	-5.76378	-4.76897	-1.73825	-5.71196	-4.08591	-0.717446	-1.26345	-5.80212	-2.37271	-1.59439	-2.01772	-0.537916	-4.61128	-4.91638	-0.700362	-1.33142	-5.30022	-5.69782	-5.27827	-1.18157	-1.40864	-5.97442	-6.43471	-3.98977	-5.15098	-4.54844	-5.40435	-1.45384	-3.06518	-0.481159	-1.85518	-3.16909	-5.60472	-5.681	-6.95608	-4.17868	-4.97475	-4.22187	-5.19662	-6.40767	-6.36516	-7.35319	-7.35998	-5.43069	-4.19866	-6.79942	-5.78698	-7.01482
ACSS3	-5.40016	-4.17882	-1.18401	-6.5456	-5.71196	-2.36971	-2.24765	-0.427114	-5.80212	-2.37271	-2.07982	-2.38969	-0.0381064	-4.61128	-6.50134	-4.55451	-2.0826	-3.30022	-1.89046	-2.95634	-1.83365	-4.12135	-2.65249	-4.43471	-6.98977	-1.06352	-4.54844	-0.404354	-2.90874	-3.92768	-1.34545	-0.603644	-3.16909	-5.60472	-5.681	-3.49664	-7.76364	-4.97475	-1.29587	-5.19662	-6.40767	-6.36516	-2.14374	-7.35998	-5.43069	-2.37923	-2.09898	-5.78698	-7.01482
ACTB	5.60476	4.33951	6.80467	1.75208	5.99195	2.43091	-0.241618	-0.927927	6.15969	6.60957	1.4645	0.889166	0.160011	7.81682	3.52656	0.410385	1.63423	5.98633	5.84424	5.7952	1.54882	3.83736	6.47421	4.57512	4.12462	6.97701	7.31188	6.09798	0.476456	4.00842	-0.85094	2.68788	3.26052	6.14011	6.64374	4.81211	3.45915	7.00717	4.40639	6.55409	5.83252	6.34694	4.40669	4.18402	6.53869	2.81782	5.53066	6.14191	4.91887
ACTR3B	-1.94073	-0.763779	-0.0140852	-0.362383	0.120933	-1.12508	-1.15404	-0.927927	-5.80212	-1.91327	-1.4118	-1.24834	0.332393	-4.61128	-2.10903	-1.08503	-1.14835	-5.30022	0.410705	-1.63441	-1.47108	-0.691366	-5.97442	-3.62735	-3.53034	-1.06352	-1.54844	-2.597	-1.45384	-0.802149	-2.10383	-0.983393	-3.16909	-0.356797	-1.98056	-1.95608	-4.17868	-0.652826	-2.5438	0.357972	-3.60032	-2.45827	-3.76823	-3.35998	-1.84573	-2.15684	-0.941437	-2.46505	-2.25994
ACVR1	-1.40016	0.323684	-4.76897	-1.33615	-1.46403	-1.12508	-0.717446	-0.229694	-1.10168	-0.565351	-1.4118	-1.46593	0.487962	0.973687	-1.64336	-1.08503	-1.78661	-0.212761	-3.11286	-1.37138	-0.393079	-0.523095	-0.0917778	-2.43471	-3.98977	-1.56602	-0.548436	0.453627	-1.33209	-1.43292	-0.327624	0.424925	-1.37554	-0.282797	-1.09604	-2.20119	-1.22448	-0.451192	-0.134411	0.869472	-0.21785	-0.0432288	-1.06779	-0.552624	-2.10877	-2.37923	-0.307565	-0.36071	-0.805371
ACVR2A	-1.00784	-1.44185	-0.245411	-2.29768	-4.12699	-1.35411	-2.24765	-0.655897	-4.21716	-0.728849	-4.32374	-2.89219	-0.537916	0.0891643	-3.17942	-4.55451	-1.78661	-3.30022	-5.69782	-1.75471	-4.64101	-1.40864	-0.301996	-4.43471	-2.34591	-1.56602	-2.22651	-4.40435	-3.34045	-3.06518	-0.188868	-0.447525	-3.61655	-1.69783	-2.51108	-2.20119	-4.17868	-4.97475	-1.10086	-1.49618	-3.23775	-2.78019	-5.76823	-2.27252	-0.786837	-5.70116	-2.47749	-1.97962	-2.25994
ADRB2	-5.40016	-5.76378	-4.76897	-3.22368	-5.71196	-2.98638	-2.92411	-1.26345	-5.80212	-5.37271	-2.81678	-8.47716	-1.30345	-4.61128	-6.50134	-1.96033	-2.0826	-5.30022	-1.89046	-2.69331	-1.83365	-7.29128	-5.97442	-3.62735	-6.98977	-5.15098	-4.54844	-5.40435	-8.76672	-3.06518	-0.653	-1.85518	-4.26863	-5.60472	-5.681	-6.95608	-4.17868	-4.97475	-3.15148	-5.19662	-6.40767	-6.36516	-7.35319	-7.35998	-5.43069	-5.70116	-6.79942	-4.20201	-7.01482
AEBP1	-0.645273	0.323684	1.73882	-3.22368	2.56881	-0.111909	-1.43685	-2.33344	2.46467	4.58874	-1.24075	-0.499876	-0.537916	3.43312	-0.0419125	-1.6039	-0.985921	2.23893	1.35746	1.80388	-0.553544	-0.101454	3.46021	1.28639	-0.00108432	2.62381	2.45156	0.917574	-1.59679	0.921227	-2.10383	-1.22197	-2.12179	2.12998	2.68532	1.74436	-0.320697	3.06964	2.31418	2.57817	3.32873	4.14462	0.889979	2.46339	3.68825	-0.131307	3.55483	3.69684	1.7434
AGR2	4.16208	-5.76378	-4.76897	-3.22368	-5.71196	-1.60787	-1.7831	-1.26345	-5.80212	-0.728849	-4.32374	-3.72227	-0.870492	-4.61128	-1.85749	-1.96033	-0.70189	-5.30022	-1.89046	-6.27827	-1.83365	-2.83185	-5.97442	-4.43471	-2.81984	-5.15098	-4.54844	-5.40435	-3.34045	-5.80215	-0.327624	-0.447525	-3.61655	-5.60472	-5.681	-6.95608	-7.76364	-4.97475	-4.22187	-5.19662	-6.40767	-6.36516	-3.54584	-7.35998	-5.43069	-3.53124	-6.79942	0.143762	-7.01482
AGTR2	-5.40016	-2.59385	-4.76897	-2.29768	-5.71196	-1.12508	-0.717446	0.48472	-5.80212	-3.37271	-1.59439	-1.06777	-0.265123	-4.61128	-1.17942	-0.269109	-0.985921	-5.30022	-1.89046	-6.27827	-0.940567	-0.22519	-5.97442	-4.43471	-1.59745	-5.15098	-4.54844	-1.81939	-1.33209	-1.63222	-0.481159	0.505478	-1.9467	-5.60472	-5.681	-6.95608	-1.71925	-4.97475	-2.5438	-2.38926	-6.40767	-4.04323	-3.54584	-3.90055	-5.43069	-2.67141	-1.75502	-5.78698	-7.01482
AGXT2L1	-5.40016	-2.59385	-4.76897	-0.773015	-5.71196	-0.927484	-0.920895	-0.655897	-5.80212	-5.37271	-1.81678	-3.72227	-0.537916	-4.61128	-3.17942	-1.31831	-1.33142	-5.30022	-3.11286	-5.27827	-0.734116	-1.40864	-5.97442	-4.43471	-3.53034	-5.15098	-4.54844	-5.40435	-1.92123	-1.63222	-0.653	-0.175272	-2.82805	-5.60472	-3.681	-6.95608	-4.17868	-4.97475	-3.63691	-5.19662	-6.40767	-6.36516	-3.76823	-7.35998	-5.43069	-5.70116	-1.30757	-5.78698	-7.01482
AHI1	2.1234	-0.119923	2.90345	-3.22368	-0.220104	-1.35411	-2.24765	-9.75129	-2.48019	-2.37271	-8.57167	-2.89219	-0.870492	1.34292	-1.64336	-1.96033	-1.33142	-0.599784	0.0570677	-0.66356	-4.64101	-1.12135	-0.141531	-3.62735	-3.98977	1.07784	0.258919	0.970685	-4.95936	-1.23736	-2.10383	0.84752	-1.37554	1.00999	0.48892	-0.978795	-4.17868	0.154529	0.559486	-0.874689	-1.01536	-1.19523	-1.14374	-0.967662	2.46412	-2.15684	-0.532632	-0.394658	0.898065
AKR7A3	1.78966	-5.76378	-4.76897	-0.193929	-5.71196	-0.0106253	-1.7831	-1.70145	-5.80212	-3.37271	-1.08786	-3.72227	-1.9335	-4.61128	-2.10903	-1.6039	-1.33142	-5.30022	-5.69782	-4.69331	-1.47108	-0.691366	-2.27398	-6.43471	-2.59745	-5.15098	-4.54844	-4.40435	-2.59679	-3.92768	-0.85094	-0.783392	-2.82805	-5.60472	-5.681	-6.95608	-4.17868	-4.97475	-1.95884	-5.19662	-6.40767	-6.36516	-7.35319	-7.35998	-5.43069	-2.37923	-2.09898	-1.26341	-6.01482
ALDH1A1	1.67666	-5.76378	0.137918	-1.33615	-2.01152	-1.35411	-1.15404	-3.48451	-5.80212	-1.91327	-2.81678	-2.89219	-1.9335	-4.61128	-2.33142	-1.31831	-0.833918	-1.9783	-1.23839	-0.66356	-1.47108	-0.523095	0.0255791	-1.73427	-1.37506	-1.56602	-4.54844	-2.08243	-1.59679	-3.06518	-0.653	-0.603644	-4.26863	-0.697834	-0.0371485	-4.63415	-7.76364	-4.97475	-0.566522	-5.19662	-2.40767	-1.90573	-2.82963	-4.55262	-0.182766	-3.53124	-2.99206	-0.232386	0.184848
ALDH1A3	0.300279	-1.85689	-4.76897	-1.33615	-5.71196	-1.35411	-1.43685	0.69372	-1.21716	0.0196118	-0.605887	-1.06777	-0.537916	2.06115	-1.85749	-1.08503	-1.78661	-2.30022	-1.23839	-0.786417	-1.83365	-1.40864	-1.33056	-3.62735	-1.37506	1.1528	-1.089	-0.944923	-1.45384	-0.456374	-0.85094	0.424925	-2.12179	0.326013	2.4989	0.461777	-7.76364	3.36064	-0.929092	-5.19662	1.88234	0.142638	-0.00446671	0.0662853	0.184016	-1.76256	1.29861	-0.880084	-0.460235
ALDH1B1	-0.312698	-1.85689	-1.76897	-0.773015	-0.464029	-0.45864	0.00662595	0.238809	1.61573	0.0196118	-1.59439	-2.38969	0.753666	-0.611275	-0.161494	-1.6039	-0.469346	-0.346028	-5.69782	-0.786417	-0.248689	-0.372416	-0.726493	-1.73427	-3.53034	-0.244091	1.3823	-1.31689	-1.45384	-1.08333	-0.062295	0.157033	-0.0536141	0.176635	-0.726808	-1.20119	-1.22448	0.725685	-1.78891	-0.874689	-0.735249	-1.90573	-2.3088	0.0829641	0.427287	-1.94627	0.0460716	-0.327543	-2.8449
ALDH2	2.67666	-1.06334	1.08901	-0.553138	0.960469	-2.98638	-0.541642	-0.229694	1.84174	1.31379	-1.08786	0.479946	-0.537916	-3.61128	0.908047	-0.269109	-0.0897573	1.98518	-1.23839	-0.0303424	0.113881	0.79087	0.365429	1.02472	1.07632	-0.196785	3.25892	4.60967	-0.108507	-2.57976	-1.67537	-0.447525	-0.361736	0.770315	1.48892	1.50745	-0.563968	0.382798	0.82252	1.22965	0.00171614	0.455022	-2.82963	-0.74527	1.21316	-0.6495	-0.126993	2.53044	0.956719
ALDH3A1	-0.815198	-4.17882	-4.76897	-8.13057	-5.71196	-1.12508	-1.43685	-1.70145	-5.80212	-5.37271	-3.36222	-5.6698	-9.32582	-4.61128	-6.50134	-3.12567	-2.0826	-5.30022	-5.69782	-6.27827	-4.64101	-1.12135	-5.97442	-4.43471	-6.98977	-5.15098	-2.96347	-2.08243	-1.59679	-3.92768	-0.85094	-0.603644	-4.26863	-5.60472	-5.681	-6.95608	-2.47824	-4.97475	-5.5438	-5.19662	-6.40767	-6.36516	-7.35319	-7.35998	-5.43069	-4.19866	-2.47749	-5.78698	-7.01482
ALDH3B2	-5.40016	-5.76378	-4.76897	-3.22368	-2.01152	-1.93907	-0.384953	-0.927927	-5.80212	3.73843	-8.57167	-3.72227	-3.05903	-4.61128	-3.69399	-1.96033	-1.78661	-5.30022	-5.69782	1.61655	-1.18157	-1.73669	2.1497	-1.43471	-2.81984	-3.15098	0.910996	4.31332	-1.74435	-2.57976	-0.85094	-0.0548553	-4.26863	-0.697834	-1.681	-3.78615	-2.47824	-1.97475	4.74449	-5.19662	0.647608	1.38304	-7.35319	-1.09319	-5.43069	-0.498222	1.19493	-0.295122	-1.6929
ALDH4A1	-1.59281	-0.763779	-4.76897	-1.02204	-5.71196	-0.598648	-1.7831	-0.427114	-5.80212	-5.37271	-0.830204	-0.00955055	0.753666	-4.61128	-0.946755	-0.040632	0.066546	-5.30022	-3.11286	-3.47091	-0.117445	-0.523095	-2.51499	-0.368618	-2.59745	-5.15098	-4.54844	-1.81939	-1.21213	-1.43292	-0.188868	0.719932	-2.12179	-5.60472	-5.681	-4.95608	-1.22448	-4.97475	-1.18625	-0.874689	-6.40767	-3.36516	-2.4463	-3.55262	-5.43069	-1.33193	-1.30757	-2.78698	-4.01482
ALDH9A1	1.65512	1.41613	3.66982	-0.553138	2.71011	1.29902	-0.717446	-0.655897	1.77531	0.735819	-1.4118	1.13571	0.160011	2.27137	0.280016	-0.040632	-0.36577	3.17551	2.23292	0.604373	0.216975	-0.22519	1.12361	1.39184	-0.248302	2.57694	2.03653	1.8051	-0.914969	1.13645	-1.34545	0.652504	0.756908	2.17663	1.69403	0.401477	-1.71925	1.6546	1.34494	2.17842	0.425215	0.600627	1.54465	0.194609	2.35721	-0.723882	1.51346	0.954492	1.38606
ALOX5AP	-2.23024	-4.17882	-2.76897	-1.33615	-1.54203	-2.98638	-9.73147	-1.70145	-0.672837	-1.91327	-1.59439	-2.01772	-1.30345	-2.61128	-6.50134	-1.08503	-1.14835	-1.9783	-5.69782	-2.95634	-3.05604	-1.73669	-1.8045	-0.576727	-2.81984	-1.82905	-4.54844	-5.40435	-1.74435	-2.57976	-1.07711	-2.31339	-1.26863	-1.51726	0.176976	-1.63415	-7.76364	0.234699	-7.5438	-5.19662	-1.88411	-3.78019	-2.82963	-3.90055	-5.43069	-4.19866	-1.51402	-1.78698	-0.885541
AMIGO2	-0.645273	-1.06334	-0.0140852	-1.33615	-0.624494	-0.45864	-1.15404	-0.229694	-1.4098	0.119147	-1.4118	-1.70897	-0.265123	5.52315	-2.69399	-1.96033	-1.14835	1.83933	-1.23839	-2.57783	-0.553544	-1.12135	-1.11644	-3.62735	-1.98977	-0.507125	-4.54844	-1.31689	-2.90874	-0.802149	-0.85094	-0.175272	-3.61655	-0.960869	-1.09604	-3.78615	-4.17868	0.725685	-1.63691	-5.19662	-1.36328	0.0611079	0.691199	-0.74527	-1.84573	-2.37923	0.626846	-1.20201	-1.15684
ANGEL2	0.789664	-0.304348	1.64042	-1.02204	-0.426554	-0.753717	-2.92411	-1.26345	-2.80212	-0.565351	-1.24075	-1.06777	-1.9335	-0.151844	-2.10903	-1.08503	-0.174755	-0.170941	-0.790929	-0.0114833	-2.31908	-0.898962	-0.219533	-1.26478	-6.98977	0.755909	1.3823	-1.81939	-1.21213	0.0475166	-0.481159	-0.303311	-0.828054	0.277918	0.0194351	-2.20119	-1.71925	0.955983	-0.0843704	0.869472	0.39968	-0.780194	-0.893763	-0.605092	0.269746	-3.0382	0.400254	-0.742581	-0.555393
ANGPTL2	-1.94073	-1.06334	-3.18401	-0.193929	0.873006	0.610557	-1.7831	-1.26345	1.3064	2.011	-0.328497	-1.24834	-1.30345	1.29562	-0.234558	-0.879912	-0.833918	-0.170941	1.07036	0.798546	-0.734116	0.021604	0.683791	0.673817	-0.45061	-0.293	0.358455	-0.0120367	-1.45384	-0.187439	-1.07711	-0.783392	-1.61655	-0.79737	-0.774114	-1.09809	-4.17868	-1.06786	-0.843362	0.125311	0.278826	0.90163	-2.82963	0.276645	0.269746	-2.37923	0.329865	1.75992	-1.55539
ANGPTL4	-5.40016	-5.76378	-4.76897	-2.29768	-2.39003	-1.35411	-4.23961	-2.33344	-5.80212	-5.37271	-2.07982	-3.72227	-3.05903	1.84816	-6.50134	-4.55451	-2.0826	-5.30022	-1.23839	-2.37138	-0.940567	-1.12135	-3.97442	-2.11278	-6.98977	-1.34363	-4.54844	-1.49746	-2.34045	-1.43292	-2.10383	-4.35442	-2.55242	-2.79737	-1.77411	-6.95608	-7.76364	-4.97475	-2.33435	-5.19662	-6.40767	-6.36516	0.995533	-3.19005	-5.43069	-5.70116	-2.09898	-5.78698	-7.01482
ANK1	-5.40016	-5.76378	-4.76897	-1.02204	-5.71196	-1.60787	-1.43685	-1.70145	-5.80212	-5.37271	-1.59439	-1.24834	-1.9335	-4.61128	-2.33142	-2.42206	-1.78661	-5.30022	-5.69782	-6.27827	-2.31908	-2.83185	-5.97442	-4.43471	-3.08288	-5.15098	-4.54844	-5.40435	-1.92123	-2.57976	-1.07711	-0.983393	-5.49102	-5.60472	-5.681	-6.95608	-7.76364	-4.97475	-7.5438	-5.19662	-6.40767	-6.36516	-7.35319	-7.35998	-5.43069	-1.94627	-2.47749	-5.78698	-7.01482
ANKRD30A	-5.40016	-5.76378	-4.76897	-3.22368	-5.71196	-0.220843	-1.43685	-0.927927	-5.80212	5.38801	-2.07982	-2.01772	-0.265123	-4.61128	-6.50134	-3.12567	-0.174755	-5.30022	-5.69782	-6.27827	-1.18157	0.126574	5.27469	-1.91115	-1.98977	-5.15098	-4.54844	3.25028	-2.59679	0.996593	-1.34545	1.44	-7.07598	-5.60472	-5.681	-6.95608	-7.76364	-4.97475	5.06999	-5.19662	-6.40767	-1.0076	-7.35319	-0.98494	-0.675806	2.47709	-6.79942	-5.78698	-7.01482
ANLN	1.1848	2.06911	1.2534	0.439289	1.33244	0.40594	0.21836	0.48472	0.10477	0.856113	-0.830204	-0.0977777	0.626922	2.24671	0.381299	-0.040632	-0.174755	0.400216	1.73681	0.489914	-0.940567	1.28992	0.726019	0.194649	-0.667841	0.707	1.89451	1.21036	-0.668686	-0.101709	0.263231	-0.0548553	0.299057	1.46136	0.528449	-0.371113	-0.112588	1.71175	-0.636911	2.39584	-0.21785	-0.0983703	-1.06779	-0.417465	1.56931	-0.6495	0.962133	-0.202013	-1.46024
APC	-1.15223	-2.59385	-4.76897	-3.22368	-3.71196	-2.98638	-2.24765	-3.48451	-5.80212	-1.56535	-3.36222	-2.89219	-3.05903	-4.61128	-6.50134	-9.25495	-2.0826	-5.30022	-5.69782	-2.95634	-3.05604	-7.29128	-2.8045	-6.43471	-6.98977	-5.15098	-1.54844	-4.40435	-3.90874	-3.06518	-2.71601	-3.01046	-4.26863	-2.4348	-5.681	-3.78615	-2.47824	-4.97475	-2.33435	-1.49618	-6.40767	-2.78019	-5.76823	-2.77502	-5.43069	-5.70116	-2.47749	-3.20201	-3.8449
AR	-5.40016	-2.59385	-4.76897	-6.5456	-5.71196	-1.35411	-1.15404	-0.0560662	-5.80212	4.4665	-1.08786	-2.01772	-1.30345	-4.61128	-1.85749	-1.6039	-0.36577	0.314486	-5.69782	-6.27827	-2.31908	-0.898962	1.14452	-3.11278	-1.10713	-2.15098	1.53903	3.60967	-1.21213	-3.92768	-2.10383	-0.783392	-1.79058	-4.60472	-5.681	-6.95608	-1.22448	-4.97475	3.86771	0.125311	-6.40767	1.66275	-7.35319	-4.19005	-5.43069	-1.59962	-2.47749	4.41637	-4.42986
ARFGAP1	2.76976	1.82118	2.30784	-0.773015	1.47787	-1.35411	-0.920895	-0.927927	1.55543	1.35521	-0.16653	0.536864	-0.0381064	2.29562	0.627939	-1.6039	-0.174755	1.25436	2.4107	1.49652	-0.393079	0.41608	0.858469	0.598715	-1.03557	1.71938	1.68038	2.2467	-1.45384	0.668171	-1.07711	-1.22197	0.830909	1.91098	1.28478	-0.297864	-0.85675	1.90789	1.20439	1.99321	-0.0857467	0.938624	-0.598307	-0.501998	0.77876	-0.182837	-0.424379	1.22425	1.18485
ARHGAP12	1.62221	1.35516	0.440481	0.875058	-0.805066	0.256479	-0.920895	-2.33344	-0.129695	0.485275	0.491724	0.291028	-0.0381064	2.00343	-0.946755	-2.42206	-0.580938	0.454664	1.52135	2.06603	-0.117445	-0.523095	-1.51499	-0.734268	-1.98977	0.915108	-0.300508	-0.404354	-1.01183	-1.23736	-0.85094	0.34175	0.113843	-0.395271	-1.77411	-3.25564	-0.320697	-0.0678637	-0.636911	-2.38926	-0.884113	-0.637236	0.290661	-1.02013	-0.343231	-3.53124	-0.214456	-1.20201	-1.7669
ARHGAP8	-0.815198	0.0435757	-4.76897	0.218161	-1.0681	0.172821	-0.920895	-1.26345	-2.48019	-1.56535	-0.71369	-1.70897	-0.0381064	0.196079	-1.17942	-1.08503	-2.0826	-2.30022	-1.23839	0.489914	-1.18157	-0.523095	0.468523	-0.434708	-2.59745	-0.0635185	0.661017	-0.404354	-2.90874	-1.08333	-0.481159	-0.0548553	-0.600249	-1.01976	-1.15744	-1.95608	-0.112588	0.273173	0.800494	-2.38926	-1.05012	0.0942747	-2.4463	-0.716123	-5.43069	-2.67141	-1.09898	-0.832779	-2.31438
ARID5A	0.243696	3.48415	0.231027	1.79276	-0.0395313	1.89789	0.712513	1.70198	1.4267	0.856113	0.975223	0.976115	0.487962	0.476187	0.77478	0.626163	0.275999	1.28474	2.13507	1.26862	0.973703	1.03515	0.580168	1.26573	-0.0709058	1.13442	0.621489	2.83405	0.213421	1.61289	0.356831	0.719932	0.645117	0.461364	0.694035	0.183476	0.940263	0.806605	1.167	1.71027	1.93218	0.753784	2.54314	0.916145	0.350666	0.410843	1.42458	0.498427	0.678663
ARID5B	0.243696	-1.06334	3.55746	-0.773015	-2.25253	-0.0106253	-1.43685	-0.655897	-1.4098	1.39548	-0.830204	-0.756057	-0.0381064	0.912286	-1.17942	-0.700362	-0.580938	1.12604	-0.790929	-0.169745	-0.553544	-0.22519	1.06997	-1.14931	-1.10713	-0.627419	-0.963473	-3.08243	-0.453835	-0.364744	-0.653	-0.447525	-1.26863	-0.282797	-1.22157	-3.25564	-0.563968	-1.27431	-0.394055	-0.152223	-0.0153574	-0.365157	-0.341968	-0.687554	0.500044	-1.33193	1.00148	0.655968	0.798957
ATF7IP	1.70836	0.759783	3.64888	-1.02204	2.24224	-0.0106253	-2.92411	-0.655897	0.572919	1.52211	-1.08786	-0.389693	-0.870492	3.14361	-0.719984	-2.42206	-2.0826	1.711	2.531	1.94573	-0.940567	0.41608	2.5294	-0.849745	-0.945375	2.55638	2.78248	1.88105	-1.74435	0.0475166	-1.67537	0.251206	-0.205617	2.68529	1.79473	1.14196	0.230713	2.35616	1.60595	2.7459	1.30657	1.54773	1.10213	0.844592	2.36372	-0.6495	1.51346	1.54394	1.8338
AURKA	-0.400161	-1.06334	-0.768973	-2.29768	-1.01152	-0.927484	-1.15404	-0.927927	-2.80212	-1.91327	-1.08786	-1.24834	-0.870492	-0.289347	-3.17942	-0.700362	-2.47402	-1.49287	-5.69782	-2.10834	-1.47108	-1.73669	-2.97442	-4.43471	-2.34591	-0.343626	-2.96347	-2.08243	-1.45384	-1.63222	-2.10383	-1.50027	-1.9467	-1.21241	-1.681	-4.14872	-2.47824	-1.27431	-2.11754	-0.874689	-4.82271	-3.04323	-2.65276	-3.19005	-5.43069	-3.53124	-1.75502	-4.20201	-5.01482
AVPI1	-0.190707	0.445674	-4.76897	-1.73825	-4.71196	-0.45864	-2.24765	-0.927927	-0.757726	-1.20278	-1.08786	-1.70897	-0.870492	1.74628	-1.45695	-0.879912	-1.54114	-1.9783	-1.23839	-0.347533	-1.47108	-1.73669	-5.97442	-2.43471	-2.81984	-0.0635185	-1.54844	-3.08243	-1.92123	-0.456374	-0.653	-0.175272	-1.9467	-1.14529	-3.09604	-4.14872	-7.76364	-1.06786	-1.29587	-5.19662	-1.94824	-2.5578	-2.06779	-2.65954	-5.43069	-2.15684	-1.09898	-0.465047	-2.10793
AXIN1	1.50673	1.47463	0.931467	-0.362383	1.58266	-1.35411	-0.113081	0.238809	0.407333	-1.20278	-1.08786	-0.899727	-0.265123	1.51801	-0.547148	0.246886	-0.269134	0.343632	-1.23839	0.291586	-1.18157	0.651236	0.564738	-0.734268	-1.86049	1.07784	2.60131	0.502536	-1.01183	0.182744	-0.327624	-0.0548553	-1.07598	1.79615	0.676547	-0.889986	-0.85675	1.72569	0.473006	1.93267	0.46269	0.2642	-0.48283	0.032338	0.698589	-1.33193	-0.0312342	0.498427	-0.555393
B4GALT6	2.76976	0.190417	0.231027	-0.362383	-5.71196	-0.220843	-0.541642	-0.229694	-5.80212	-1.20278	-0.949619	-1.46593	0.160011	0.710653	-1.33142	-0.879912	-0.70189	1.51995	-5.69782	-2.19081	0.113881	-0.898962	-5.97442	-1.43471	-1.70437	-3.56602	1.3823	-5.40435	-0.74435	-1.89526	-0.327624	0.719932	-2.82805	-0.746744	-5.681	-2.31222	0.0692499	-1.51532	-0.636911	0.125311	-3.23775	-2.78019	-1.06779	-0.933715	-0.907132	-1.0963	-0.941437	-5.78698	-1.88554
BAG1	0.50673	-0.763779	0.31849	-1.02204	-2.01152	-0.45864	-0.384953	-0.229694	-3.48019	-1.56535	-0.949619	-1.24834	-0.265123	1.38872	-0.946755	-0.879912	0.066546	-1.71526	-0.449892	-0.347533	0.00284971	-0.523095	-0.330565	-3.62735	-2.59745	-0.566019	1.25892	-1.08243	-0.270863	-0.456374	-0.327624	0.84752	-1.61655	-1.14529	-0.980565	-1.63415	-0.85675	0.112709	-0.698312	-0.874689	-0.98141	0.126696	-0.533016	-1.25145	-0.0383762	-0.428144	-0.214456	-0.263413	-1.8449
BBS4	-5.40016	-5.76378	-2.18401	-1.33615	-5.71196	-1.12508	-0.920895	-0.655897	-5.80212	-5.37271	-2.81678	-2.89219	-1.30345	-2.02631	-3.69399	-2.42206	-0.70189	-5.30022	-1.89046	-1.57783	-1.47108	-7.29128	-2.38946	-3.62735	-6.98977	-1.45054	-4.54844	-4.40435	-2.10851	-1.08333	-1.07711	-0.783392	-1.49102	-3.01976	-5.681	-6.95608	-4.17868	-4.97475	-2.33435	-0.44173	-3.23775	-3.19523	-2.06779	-2.90055	-2.62334	-3.0382	-2.47749	-2.78698	-2.10793
BCL2	-5.40016	-0.515852	-0.521045	-8.13057	-1.01152	-1.60787	-2.24765	-1.70145	-2.80212	-5.37271	-1.4118	-2.89219	-0.537916	-4.61128	-1.85749	-3.12567	-1.78661	-1.0523	-3.11286	-2.37138	-0.248689	0.853379	-0.273981	-6.43471	-3.08288	-1.69155	-0.300508	-4.40435	-1.92123	-3.06518	-1.07711	-0.603644	-3.16909	0.545022	-2.681	-1.34137	-4.17868	-4.97475	-2.5438	-5.19662	-6.40767	-3.78019	-7.35319	-3.77502	1.33749	-3.53124	-1.09898	-2.78698	-0.711043
BECN1	2.88061	1.47463	1.98591	1.94491	1.21878	0.786212	0.00662595	-2.33344	1.55543	1.52211	0.229229	-0.00955055	-1.30345	2.88058	0.128012	-0.400083	-0.985921	1.22334	1.6685	1.57971	0.00284971	1.14335	0.845758	1.26573	-0.345913	1.6172	1.33421	1.41582	-1.33209	0.242245	-0.85094	-0.175272	0.589354	0.752827	0.585782	0.519658	-1.71925	1.19517	0.163557	1.22965	0.00171614	0.204699	-0.105267	1.15966	0.759131	-1.94627	0.873007	0.235393	0.083208
BET1L	2.0261	0.0435757	1.75459	-1.02204	0.873006	-0.598648	-0.717446	-0.427114	-0.847924	0.0196118	-1.59439	-3.72227	-0.870492	1.78104	-1.17942	-1.31831	-0.985921	-0.776662	-0.174258	1.64059	-1.47108	-0.898962	1.10239	-1.57673	-1.49792	1.49287	2.61144	-0.082426	-2.90874	-0.566933	-0.653	-0.983393	-2.55242	1.20263	1.89642	-0.297864	-1.71925	2.73949	0.121534	1.78066	0.450306	0.612123	0.185964	0.0994522	1.22752	-1.20931	0.200582	0.940945	1.31161
BHLHE40	1.0261	-1.44185	0.623345	0.714923	1.98153	1.17551	-1.7831	-1.70145	0.9258	2.15086	-0.949619	-2.38969	-0.870492	4.80868	-0.161494	-3.12567	-1.33142	-0.0522965	0.256377	1.42909	-0.734116	0.651236	3.28061	0.150255	-0.248302	2.14364	2.51765	3.19556	-2.10851	0.716176	-1.07711	-0.783392	0.678906	2.1232	2.17074	0.673282	-2.47824	1.87074	2.42918	1.71027	1.27883	1.15054	2.97099	1.29823	1.54659	-1.59962	0.329865	2.6139	0.342728
BHMT	-5.40016	-5.76378	-4.76897	-2.29768	-5.71196	-4.08591	-2.92411	-2.33344	-3.48019	-2.37271	-8.57167	-3.72227	-1.30345	-2.61128	-6.50134	-4.55451	-3.78661	-3.30022	-3.11286	-6.27827	-0.734116	-2.83185	-5.97442	-4.43471	-4.98977	-5.15098	-4.54844	-5.40435	-1.74435	-5.80215	-1.34545	-2.31339	-5.49102	-3.60472	-5.681	-6.95608	-1.71925	-4.97475	-5.5438	-5.19662	-6.40767	-3.36516	-7.35319	-7.35998	-5.43069	-3.0382	-2.99206	-5.78698	-7.01482
BIRC5	2.58852	3.18751	3.71887	-0.362383	2.2824	0.786212	-2.92411	-0.427114	1.01806	1.64966	-0.328497	-1.46593	0.160011	3.25909	1.08362	-1.96033	-0.0897573	3.05733	3.60824	2.56093	-0.940567	1.46694	2.27824	0.598715	-0.497916	2.94705	5.12045	2.58433	-1.21213	1.13645	-1.07711	-0.603644	1.93245	3.14347	2.38508	1.58696	0.0692499	3.70824	-1.78891	3.08878	1.32025	0.189432	-3.10527	0.897408	1.35067	-3.53124	1.00148	2.84238	-1.8449
BLVRA	-5.40016	-0.304348	-0.862082	-2.29768	-2.39003	-2.36971	-1.7831	-2.33344	-4.21716	-0.243423	-1.59439	-3.72227	-1.9335	-0.026313	-2.33142	-1.6039	-2.0826	-1.71526	-1.23839	-1.63441	-2.31908	-2.20382	-0.2465	-3.11278	-3.98977	-1.56602	-0.300508	-1.49746	-2.10851	-2.17766	-2.71601	-2.31339	-5.49102	-1.60472	-1.35908	-2.00188	-7.76364	-2.97475	-1.63691	0.357972	-2.94824	-2.19523	-3.10527	-4.19005	-3.84573	-2.37923	-1.09898	-0.742581	-1.72942
BMPR2	0.789664	1.08171	1.88924	-0.362383	0.194934	-1.12508	-1.7831	-1.26345	0.898319	0.735819	-1.24075	-1.70897	-1.30345	2.31946	-0.828919	-3.12567	-1.33142	1.44124	1.5968	0.604373	-0.393079	-0.22519	1.20549	-1.04239	-1.10713	0.731662	1.00615	0.881048	-1.21213	-0.92768	-1.34545	-1.50027	-0.906057	0.871009	0.12635	-0.513132	-1.71925	-1.38979	-0.277015	1.12531	0.487143	0.690126	-0.943804	0.319501	0.613701	-3.0382	1.19493	0.782881	-0.00359687
BRCA1	-1.15223	-1.06334	0.440481	-6.5456	-1.46403	-1.93907	-2.92411	-2.33344	-5.80212	-3.37271	-2.81678	-1.46593	-3.05903	-0.44135	-2.69399	-1.96033	-3.78661	-3.71526	-3.11286	-3.27827	-2.31908	-1.73669	-5.97442	-1.57673	-3.08288	-2.34363	-4.54844	-3.08243	-4.95936	-1.43292	-1.67537	-1.50027	-1.49102	-4.60472	-5.681	-2.78615	-4.17868	-4.97475	-5.5438	-0.44173	-6.40767	-6.36516	-7.35319	-5.03805	-5.43069	-4.19866	-6.79942	-5.78698	-7.01482
BRCA2	0.300279	1.15508	1.64042	-0.773015	-2.12699	-0.753717	-0.241618	-1.26345	-5.80212	-5.37271	-0.16653	-0.756057	-0.265123	-1.02631	-0.547148	-1.08503	-0.580938	-0.442243	-1.89046	-0.754708	-0.734116	-0.523095	-0.482568	-2.43471	-1.49792	-0.150981	-0.741081	-0.760498	-0.83008	-0.0295596	0.163135	-0.303311	0.375229	-0.517262	-1.59354	-1.25564	-0.563968	-0.582437	-1.39405	1.44724	-1.54969	-1.66472	-2.96088	-1.33761	-3.43069	-0.810391	-1.75502	-2.46505	-2.7669
BRDT	-5.40016	-5.76378	-4.76897	-2.29768	-5.71196	-2.98638	-4.23961	-1.26345	-5.80212	-5.37271	-2.40175	-5.6698	-1.9335	-4.61128	-2.10903	-2.42206	-2.0826	-5.30022	-5.69782	-6.27827	-1.47108	-2.20382	-5.97442	-6.43471	-6.98977	-5.15098	-4.54844	-5.40435	-3.90874	-7.38711	-1.67537	-0.983393	-4.26863	-5.60472	-5.681	-6.95608	-4.17868	-4.97475	-7.5438	-5.19662	-6.40767	-6.36516	-7.35319	-7.35998	-5.43069	-5.70116	-6.79942	-5.78698	-7.01482
BRIX1	0.789664	0.445674	2.52565	0.875058	1.98153	0.545524	0.56545	0.787864	-0.129695	1.64966	0.628001	0.0697384	1.08039	2.86446	-0.0419125	0.486516	1.05361	1.49419	1.26796	1.15636	1.14035	0.323431	1.40062	0.150255	0.118755	1.24134	3.152	0.724929	0.172861	0.757547	1.16873	1.17396	0.113843	1.8299	1.85815	-0.616225	-1.22448	1.45151	-0.134411	2.7459	0.487143	0.442198	-0.507705	-0.304697	1.31077	-0.367261	-0.424379	1.23539	0.114459
BRP44	3.93969	2.92272	4.38585	2.81121	2.20093	2.28166	0.907874	0.48472	2.46467	4.72401	1.16811	0.594306	0.332393	3.25909	1.76075	-0.700362	-0.469346	3.78724	3.28517	2.50963	0.973703	1.66001	2.91432	1.90068	0.811131	3.25416	2.5496	3.29609	-0.00849499	2.43147	-0.481159	0.719932	2.32062	3.36394	1.42752	0.778635	0.375911	2.29203	2.86453	3.17842	1.34052	1.03572	0.776088	1.39824	2.61915	-0.241731	2.08016	2.66424	1.91887
BYSL	-0.00784314	-0.515852	1.06392	-1.73825	1.33244	-1.12508	-4.23961	-1.70145	1.26397	-0.980388	-3.36222	-1.70897	-9.32582	-0.289347	-1.64336	-1.6039	-2.47402	0.0920934	1.44173	0.291586	-1.18157	-0.372416	-0.514989	-0.942855	-2.59745	1.27528	0.621489	0.683109	-2.90874	-1.89526	-2.10383	0.0536692	-2.32109	0.699056	0.761939	-2.20119	-4.17868	1.57983	-1.52143	0.993207	-0.0678248	-0.810568	-3.54584	-0.283164	1.90022	-2.15684	-1.09898	-0.295122	-0.825
C13orf15	-0.00784314	-0.119923	1.29712	-1.02204	0.120933	-0.331026	-0.920895	0.366349	-0.409803	1.15086	-0.245242	-0.756057	-0.265123	3.39995	-2.10903	-0.879912	-0.00948993	0.223338	3.04027	2.52909	-0.248689	0.232283	1.61804	-0.942855	0.314012	2.40361	1.00615	0.150235	-1.74435	-0.268171	0.0540637	0.34175	0.501447	0.918837	0.810848	-0.0135606	-0.320697	-0.804829	1.87405	1.34254	1.89611	0.56558	0.414989	0.262072	-0.182766	-0.810391	1.67631	1.33197	1.13999
C17orf91	1.44533	-5.76378	-0.376655	-0.773015	0.194934	-1.35411	-0.384953	-0.655897	-0.757726	-0.565351	-0.949619	-1.24834	0.160011	0.710653	-1.85749	-0.879912	0.338676	-1.21276	0.0570677	-0.956342	-0.734116	-2.83185	-0.582103	-1.14931	-1.70437	-1.45054	-0.0890043	0.502536	-1.74435	-0.802149	0.0540637	0.424925	-0.988519	-1.51726	-0.726808	-0.496643	-1.22448	-2.65283	0.0411605	0.125311	-0.707235	-0.841595	-0.753282	-0.57862	-4.43069	-1.76256	0.0460716	-0.832779	-0.107934
C18orf25	0.300279	1.08171	2.85308	-0.362383	0.218781	-0.220843	0.21836	0.366349	-0.592667	-1.56535	-0.245242	-1.24834	0.332393	1.14361	-1.64336	-1.96033	-0.174755	0.343632	0.0570677	-0.27827	-1.83365	-0.898962	0.71208	-1.57673	-0.799944	0.403607	2.53903	0.377006	-0.591793	-0.802149	0.356831	0.424925	-1.26863	1.05349	-0.359077	-0.269575	-1.71925	-0.389792	-1.29587	0.125311	-0.453478	-0.841595	-0.893763	0.0994522	0.926858	-1.76256	-0.424379	0.342308	0.460909
C1QTNF3	-1.94073	-4.17882	0.31849	-3.22368	-1.71196	-1.93907	-2.92411	-1.26345	-1.89523	1.25665	-2.40175	-5.6698	-1.30345	-1.61128	-3.69399	-3.12567	-2.47402	0.314486	-5.69782	2.39062	-1.47108	-1.40864	-0.886958	-1.91115	-2.59745	-0.758664	-1.089	-0.0120367	-2.34045	-1.43292	-0.653	0.251206	-2.12179	-0.697834	-0.681005	-3.78615	-7.76364	-4.97475	-2.84336	-1.49618	0.131484	-1.90573	-0.829633	-1.80539	-0.845731	-2.37923	-1.75502	-2.20201	-2.06063
C2CD4A	0.243696	-1.44185	-4.76897	-1.02204	-5.71196	-2.36971	-0.384953	-0.427114	-2.80212	0.581491	-0.328497	-1.70897	-0.537916	-2.61128	-2.69399	-0.879912	-0.36577	-5.30022	-3.11286	-6.27827	-0.940567	-0.691366	-5.97442	-2.73427	-0.881245	-5.15098	0.910996	-1.81939	-1.45384	-1.63222	-0.653	0.0536692	-3.61655	-3.2828	-5.681	-6.95608	-2.47824	-4.97475	-1.18625	-1.49618	-6.40767	0.110577	-1.62527	-7.35998	-5.43069	-0.723882	-2.99206	-5.78698	-7.01482
C3orf52	2.0261	-1.44185	-4.76897	-2.29768	-1.62449	-1.12508	-0.717446	-0.229694	-2.80212	-1.20278	-2.40175	-2.01772	-1.30345	-4.61128	-1.64336	-1.96033	-2.0826	-2.49287	-5.69782	-2.95634	-0.393079	-7.29128	0.517432	-1.57673	-2.18241	-2.56602	1.09542	1.70417	-1.59679	-1.89526	-0.85094	-0.303311	-1.49102	-1.51726	-5.681	-0.978795	-2.47824	-0.582437	-1.52143	-0.874689	-2.60032	-6.36516	-3.10527	-1.80539	-3.43069	-2.37923	-2.09898	-5.78698	-5.01482
C4orf31	-5.40016	-5.76378	-4.76897	-1.02204	-5.71196	-1.93907	-0.920895	-1.70145	-5.80212	0.649662	-2.81678	-2.89219	-0.537916	-4.61128	-6.50134	-1.96033	-1.78661	-5.30022	-3.11286	-6.27827	-2.31908	-2.83185	-5.97442	-6.43471	-2.81984	-5.15098	-4.54844	-5.40435	-2.34045	-5.80215	-1.67537	-0.603644	-2.82805	-5.60472	-5.681	-6.95608	-7.76364	-4.97475	-0.775618	-2.38926	-6.40767	-6.36516	-7.35319	-7.35998	-5.43069	-4.19866	-1.75502	-5.78698	-7.01482
C4orf32	-5.40016	-5.76378	-4.76897	-6.5456	-5.71196	-1.60787	-1.43685	-3.48451	-5.80212	-3.37271	-3.36222	-2.89219	-1.9335	-4.61128	-6.50134	-3.12567	-2.98592	-5.30022	-5.69782	-3.27827	-4.64101	-2.20382	-2.8045	-4.43471	-3.98977	-5.15098	-4.54844	-5.40435	-3.34045	-3.92768	-1.67537	-1.22197	-2.32109	-5.60472	-5.681	-6.95608	-7.76364	-4.97475	-1.95884	-0.874689	-3.60032	-6.36516	-7.35319	-7.35998	-5.43069	-8.28612	-2.47749	-4.78698	-4.6929
C6orf145	-0.54218	1.2915	1.29712	-1.02204	1.39657	-2.98638	-0.920895	-0.655897	1.61573	-2.37271	-1.81678	-2.38969	-0.870492	1.91229	-3.17942	-1.6039	-1.33142	0.606667	-0.790929	-0.852005	-1.83365	-1.12135	0.400619	-1.14931	-1.59745	0.549458	-0.548436	-0.944923	-2.59679	-0.456374	-2.10383	-0.447525	-1.79058	-0.319323	-0.471551	-1.70815	-2.47824	-0.451192	-0.566522	-5.19662	0.437815	-0.175332	-3.54584	0.628705	1.18402	-4.19866	-0.532632	-0.232386	-0.132181
CAPN13	-5.40016	-5.76378	-4.76897	-2.29768	-5.71196	-1.12508	-1.15404	-1.26345	-5.80212	-2.37271	-1.59439	-2.89219	-0.870492	-4.61128	-4.91638	-3.12567	-2.0826	-5.30022	-1.23839	-3.95634	-0.734116	-1.73669	0.956316	-6.43471	-0.61473	-0.293	-4.54844	-0.649467	-2.59679	-2.17766	-0.653	-0.447525	-7.07598	-5.60472	-5.681	-4.63415	-4.17868	-4.97475	-0.334349	-5.19662	-3.82271	0.529661	-0.861342	-5.77502	-5.43069	-0.90242	-3.99206	-0.539048	-7.01482
CCDC93	2.2437	2.14311	2.11367	-1.33615	1.55483	-0.0106253	0.312928	-0.229694	0.407333	0.984846	-0.605887	-0.0977777	-0.265123	1.47619	-0.31152	0.0624615	-0.70189	1.49419	0.568967	0.687514	-0.553544	0.323431	0.235032	-0.653348	-1.03557	1.60391	2.13806	1.2395	-0.914969	-0.456374	0.0540637	-0.303311	-0.205617	1.18969	0.566923	-0.581036	-2.47824	2.43464	0.590624	1.93267	0.278826	0.722306	-1.28711	-0.394195	0.944346	-0.723882	0.0460716	-0.928994	-0.328324
CCL5	0.45782	-0.763779	2.91753	-1.02204	2.27673	-0.220843	0.712513	-0.0560662	3.55763	0.735819	0.338222	-0.499876	0.626922	1.59818	1.53208	0.754877	0.138774	1.14272	-0.174258	2.46656	1.19188	-0.372416	1.14452	2.33016	1.20006	-0.69155	2.13806	0.453627	-0.159388	-1.08333	0.0540637	-0.175272	2.35656	1.17663	2.26736	2.39044	0.507823	3.3828	0.163557	2.53809	2.38674	-0.0613761	0.624085	1.38485	0.635396	1.77862	0.266671	2.54394	2.26595
CCNB1	3.1234	1.86558	3.32906	0.332957	2.48772	-0.753717	-0.920895	-1.26345	1.79779	0.485275	-0.4118	-0.282399	-0.0381064	4.24359	1.66858	-1.31831	-3.78661	3.10492	1.80203	1.39416	-1.18157	0.579086	1.90822	0.598715	0.595193	3.13904	3.75077	2.23227	-1.59679	0.470869	-2.10383	-0.447525	1.42784	2.94602	1.61362	0.883129	-1.22448	3.14937	-1.52143	3.1208	0.333792	0.938624	-1.68077	-0.716123	2.24173	-1.59962	0.266671	1.30049	-1.06063
CCND1	2.54821	-0.515852	0.137918	-0.553138	-0.285692	-0.331026	-1.15404	-0.427114	1.63251	2.22721	0.107809	1.61163	-0.265123	5.11153	-0.372061	1.88268	-0.469346	1.4277	2.4107	0.50309	0.113881	-0.898962	0.0916683	0.88722	0.518026	1.03884	3.84388	2.55565	0.0374128	-0.672866	-0.188868	-1.50027	0.560643	2.39528	0.858154	2.43624	-2.47824	1.40029	1.41039	2.78066	1.98464	0.541734	1.21666	1.67344	1.33749	-1.00072	0.575621	2.97458	2.2775
CCNE1	-0.190707	-0.515852	0.185224	-1.73825	1.00229	-1.12508	-0.920895	-0.655897	-5.80212	-0.565351	-1.24075	-2.38969	-1.9335	-4.61128	-0.547148	-1.96033	-1.78661	-1.21276	0.568967	-0.66356	-2.31908	-4.12135	0.154862	-2.11278	-3.98977	0.241336	3.73697	-0.275071	-1.45384	-0.92768	-0.85094	-0.175272	-1.16909	0.482738	0.151885	-2.20119	-0.563968	1.02525	-3.63691	1.99321	-6.40767	-6.36516	-7.35319	-1.42924	0.154269	-2.37923	-6.79942	-2.08654	-2.01482
CCNG2	1.2292	1.82118	2.76241	-1.73825	2.4975	1.33795	-0.384953	-0.229694	0.53773	2.46018	0.229229	0.594306	0.332393	3.31946	0.509883	-0.879912	0.668582	1.09209	1.73681	2.05265	0.31319	1.14335	2.82971	0.372647	-1.70437	1.99877	4.25246	2.05508	-1.21213	-0.0295596	0.527572	0.251206	-0.110198	2.31414	1.72839	1.13139	0.740186	1.46819	2.14968	2.53809	1.19966	1.34909	2.00655	1.64565	1.64612	0.0758191	1.97866	3.48215	2.08584
CD163	-0.645273	-2.59385	0.0890083	-1.33615	1.25383	-2.36971	-0.541642	-0.427114	0.767735	-1.56535	-2.81678	-2.38969	-1.30345	1.03258	-2.69399	-2.42206	-0.70189	0.0217041	-1.89046	0.710415	-1.83365	-1.12135	0.908222	-0.576727	-1.10713	0.893413	-2.96347	-0.944923	-2.90874	-3.92768	0.163135	0.251206	-3.61655	0.461364	1.99848	-2.49664	-1.71925	1.57983	-0.277015	2.66757	0.984643	-0.905725	-1.20345	-0.98494	0.77876	-2.37923	-0.649671	0.871236	1.90106
CD1E	-5.40016	-5.76378	-4.76897	-2.29768	-5.71196	-1.60787	-1.7831	-1.70145	-5.80212	-5.37271	-2.07982	-5.6698	-0.537916	-4.61128	-4.91638	-3.12567	-1.78661	-5.30022	-1.89046	-6.27827	-3.05604	-1.40864	-5.97442	-3.62735	-6.98977	-5.15098	-4.54844	-5.40435	-2.90874	-3.06518	-1.34545	-0.303311	-3.61655	-5.60472	-5.681	-5.95608	-2.47824	-4.97475	-3.15148	-5.19662	-6.40767	-6.36516	-4.03127	-7.35998	-5.43069	-3.0382	-2.47749	-5.78698	-7.01482
CD24	5.99323	6.44537	6.37377	6.70652	6.49475	5.76215	4.23035	2.65757	8.2557	7.01073	4.96056	4.61362	4.43501	4.94906	6.12801	5.11403	5.14908	4.37397	6.94851	5.32721	5.45012	7.73343	2.56474	5.65739	7.18422	7.17545	6.8583	6.57793	5.15531	5.31224	2.45248	5.90971	6.49399	4.57145	5.80985	4.29363	9.0769	7.16096	4.41837	4.16533	6.17658	9.2154	2.61691	5.64897	6.80053	3.39643	5.70937	2.18457	3.94952
CD28	-5.40016	-2.59385	-4.76897	-6.5456	-5.71196	-1.35411	-0.717446	-3.48451	-5.80212	-5.37271	-2.81678	-1.70897	-0.870492	-4.61128	-4.91638	-2.42206	-1.14835	-5.30022	-5.69782	-3.27827	-2.31908	-1.40864	-3.16707	-3.11278	-2.59745	-5.15098	-4.54844	-4.40435	-2.59679	-5.80215	-0.653	-1.85518	-7.07598	-5.60472	-4.09604	-2.78615	-2.47824	-4.97475	-2.11754	-5.19662	-2.40767	-6.36516	-7.35319	-3.77502	-5.43069	-3.53124	-6.79942	-4.78698	-1.42986
CD3EAP	-0.0782325	0.850931	-2.76897	-1.73825	-0.0972468	-1.60787	-2.24765	-1.26345	-2.80212	-5.37271	-1.81678	-2.89219	-3.05903	-1.61128	-0.946755	-1.6039	-0.985921	-0.776662	-0.790929	-1.03034	-2.31908	-0.101454	-1.5821	-1.26478	-3.53034	-0.0216983	1.00615	1.21036	-1.92123	-1.43292	-0.653	-0.983393	0.299057	0.0957149	-2.35908	-4.95608	-7.76364	0.417563	-1.10086	-5.19662	-2.15975	-1.32076	-5.03127	-2.45309	-0.182766	-4.19866	-2.47749	-0.501573	-7.01482
CD44	3.99001	2.88008	2.87488	-1.73825	1.63677	1.37586	-1.43685	-0.427114	6.60302	1.92192	-0.091891	2.01068	-0.537916	5.01261	0.553938	3.33914	-0.269134	3.00356	2.77386	4.10435	0.913582	2.51285	0.991363	1.98314	-0.0709058	3.92048	3.26535	3.42219	-1.74435	0.757547	-0.85094	0.0536692	-0.361736	3.03913	2.20774	1.74089	-0.563968	3.54095	1.67537	3.48988	2.74207	1.70631	1.20139	1.0871	2.30402	-0.0240299	1.70441	1.80548	0.270578
CD68	0.577119	-1.85689	-0.768973	-0.773015	-1.31964	-1.35411	-0.541642	0.238809	-0.847924	-1.91327	-1.59439	-1.06777	-0.0381064	-2.02631	-1.85749	-0.544145	-0.985921	-1.71526	-1.89046	-0.66356	-0.734116	-2.20382	-0.689019	-2.43471	-1.37506	-1.82905	-2.22651	-0.649467	-0.83008	-1.23736	-0.188868	-0.783392	-2.55242	-2.2828	-0.0662948	-1.25564	-1.71925	-0.887291	-0.929092	-0.152223	-1.15975	-1.78019	-1.68077	-1.63206	-1.5238	-1.59962	-1.51402	-0.786975	-0.233464
CDC20	0.847767	2.03064	2.48842	0.948918	1.61896	-0.753717	-1.15404	-2.33344	1.61573	-0.728849	-1.4118	-2.01772	-0.870492	0.0891643	1.6124	-3.12567	-1.78661	2.35083	1.26796	-0.786417	-0.393079	-0.22519	-0.582103	0.150255	-1.59745	2.99368	1.73697	1.0875	-1.10851	-0.187439	-0.85094	0.0536692	0.341871	2.5038	1.22589	-1.59852	-1.22448	2.05867	-5.5438	2.23801	-0.341586	-1.97284	-4.54584	-1.13116	1.62459	-2.67141	-0.799418	-0.501573	-3.31438
CDC6	0.45782	-2.59385	1.51643	-6.5456	0.146024	-1.35411	-1.7831	-0.927927	-1.89523	-0.124778	-1.59439	-2.01772	-1.9335	0.476187	-1.04191	-3.12567	-1.54114	0.400216	-0.449892	0.197464	-1.83365	-0.691366	-0.582103	-1.43471	-1.59745	0.826299	1.17948	-0.194901	-2.10851	-0.802149	-0.481159	-0.303311	-1.49102	0.372555	-0.359077	-2.09809	-4.17868	0.45151	-3.63691	0.531303	-2.94824	0.743368	-4.03127	-1.02013	-0.430694	-2.15684	-2.09898	-2.78698	-4.42986
CDH3	0.0916925	1.08171	1.44048	0.332957	2.9319	0.945935	0.00662595	0.69372	4.12566	0.649662	-0.830204	-1.24834	0.487962	4.71291	0.77478	0.0624615	0.275999	0.787239	2.18482	-0.852005	0.850847	-0.22519	-1.5821	1.88722	1.24864	2.89887	1.40576	0.618014	-0.83008	-0.0295596	-0.327624	0.505478	0.560643	2.72619	1.62278	-0.826792	0.940263	3.30602	-2.11754	1.62356	0.511188	-0.365157	0.290661	1.88319	1.4148	-3.0382	1.80049	-1.46505	1.0937
CDK17	0.45782	-0.763779	2.55296	-1.73825	0.827202	-1.35411	-0.717446	-2.33344	-2.21716	-5.37271	-2.07982	-0.625407	0.487962	1.63665	-2.10903	-1.6039	-0.985921	0.159208	-1.23839	0.321643	-1.18157	-2.20382	1.40062	-1.57673	-3.98977	0.433981	1.79141	0.087499	-1.45384	-0.566933	-0.481159	0.424925	-1.37554	0.770315	0.48892	-0.464222	-1.71925	-0.330898	-0.0843704	0.125311	-0.23775	0.126696	-1.10527	-0.900548	0.591674	-0.498222	-2.47749	0.688758	0.82438
CDKN1A	2.10763	-1.06334	1.08901	-0.193929	-0.390029	-0.0106253	-0.541642	-0.229694	0.572919	1.05356	-1.24075	-0.625407	-0.0381064	2.53847	-1.04191	-0.700362	-0.174755	0.191629	-1.89046	0.861281	-0.734116	-0.372416	0.383131	0.150255	-0.741841	0.372581	1.23292	3.25028	-1.10851	-0.0295596	0.0540637	0.579956	-1.26863	0.150163	0.0469158	-0.464222	-2.47824	1.17499	2.11083	1.85867	0.192238	0.600627	0.529448	0.36112	2.17664	-1.59962	1.89058	0.981209	0.53207
CDKN2AIP	-1.59281	0.323684	-4.76897	-0.773015	-1.31964	-0.753717	-1.15404	0.0988923	-2.48019	-1.91327	-0.949619	-2.01772	-0.537916	-2.02631	-1.85749	-0.879912	-1.33142	-1.71526	-3.11286	-2.95634	-0.117445	-1.73669	-2.27398	-3.62735	-2.59745	-1.98106	-3.54844	-0.649467	-1.01183	-0.802149	-0.062295	-0.0548553	-1.61655	-2.60472	-3.35908	-1.86861	-2.47824	-4.97475	-2.33435	0.710273	-6.40767	-3.5578	-2.14374	-5.03805	-3.84573	-2.15684	-2.47749	-1.97962	-3.6929
CDX2	0.45782	-5.76378	-4.76897	-0.773015	-5.71196	-2.36971	-1.43685	-2.33344	-5.80212	-1.91327	-1.24075	-2.38969	-3.05903	-4.61128	-2.33142	-2.42206	-1.54114	-5.30022	-3.11286	-6.27827	-2.31908	-4.12135	-5.97442	-6.43471	-6.98977	-5.15098	-4.54844	-3.08243	-2.59679	-3.92768	-1.34545	-1.85518	-2.82805	-5.60472	-5.681	-6.95608	-4.17868	-4.97475	-3.15148	-1.49618	-6.40767	-6.36516	-7.35319	-7.35998	-5.43069	-3.0382	-1.51402	-5.78698	-7.01482
CEBPD	2.72912	0.445674	4.60389	1.43168	4.55366	0.841441	-0.113081	-0.655897	3.32974	2.32773	-1.81678	-0.389693	-0.265123	3.23421	0.838506	0.0624615	0.066546	3.14686	0.0570677	1.81449	0.403388	-0.523095	2.80037	1.45404	0.350081	2.54946	3.46279	2.84831	-0.668686	1.91438	-0.062295	-0.983393	1.76007	2.94217	3.06719	1.32933	-0.112588	3.77008	3.35253	3.90929	3.09217	2.35252	2.95514	2.02372	4.64211	0.48206	2.64973	2.69281	3.42397
CENPF	3.17349	4.52854	4.75263	3.04685	2.65437	1.76316	-0.717446	0.238809	2.3064	1.10303	1.94008	0.417662	0.160011	2.67413	2.3874	2.01593	0.207558	3.43449	4.19396	2.19341	0.850847	1.28992	1.81348	2.89845	0.043654	4.03141	4.50956	2.70939	1.8535	2.94939	0.444726	0.579956	3.34398	3.39528	2.13278	1.27754	2.59061	3.00824	-0.929092	3.34254	1.54652	-0.277694	-1.399	0.498002	2.45195	-1.00072	1.95547	0.63929	-2.31438
CEP55	-0.00784314	0.558149	1.95895	-3.22368	0.516862	-1.93907	-0.920895	-0.655897	-5.80212	-0.418509	-4.32374	-1.46593	-0.0381064	1.84816	-1.33142	-1.31831	-1.54114	-0.776662	-1.89046	-2.10834	-2.31908	-0.898962	-0.219533	-2.11278	-3.08288	1.88244	2.24598	-0.082426	-2.34045	-1.63222	-3.82293	0.157033	-2.32109	0.735125	0.842557	-1.63415	-0.85675	2.03647	-2.84336	-0.152223	-1.82271	-6.36516	-7.35319	-2.03805	-1.18277	-3.0382	-1.75502	-0.61705	-2.25994
CHSY1	1.07557	2.37065	2.74673	-0.553138	1.4975	-1.12508	-2.24765	-1.26345	1.28534	1.21226	-0.505582	-1.06777	0.871398	1.14361	-1.04191	-0.700362	-0.70189	1.66556	3.51407	2.24529	-0.393079	0.021604	1.37431	0.333477	-1.98977	2.52144	1.79141	1.83405	-1.92123	-0.268171	-0.85094	0.964735	-0.110198	2.53483	1.92633	0.651255	-0.112588	2.70473	-0.134411	2.70425	3.43153	0.753784	1.81923	1.41151	2.14674	-1.46595	0.626846	2.17881	0.898065
CITED2	-1.59281	0.759783	3.57532	-0.362383	1.80374	-0.0106253	0.21836	0.48472	0.9258	0.485275	0.491724	-0.499876	0.871398	3.03258	-0.0419125	-0.700362	0.618941	0.606667	0.960392	1.07046	-0.248689	-0.101454	1.92645	0.410782	0.0763202	1.76788	1.99072	2.72493	0.0374128	-0.268171	0.263231	1.12505	-0.110198	0.5038	1.74526	-0.110585	-0.112588	0.639956	1.06722	2.48988	0.250537	0.690126	1.66361	0.546911	1.75913	0.119017	0.77801	1.59673	2.34053
CKMT2	-3.8152	-4.17882	-4.76897	-1.02204	-5.71196	-1.60787	-0.241618	-0.927927	-5.80212	-0.980388	-0.091891	-2.38969	-0.0381064	-4.61128	-2.69399	-1.08503	-0.36577	-5.30022	-5.69782	-2.95634	-1.18157	-0.372416	-5.97442	-1.91115	-1.98977	-2.82905	-2.96347	-1.31689	-0.914969	-1.63222	0.605918	-0.0548553	-1.79058	-5.60472	-5.681	-5.95608	-0.85675	-4.97475	-1.29587	-0.152223	-6.40767	-2.78019	-2.22391	-2.77502	-5.43069	-1.33193	-1.30757	-5.78698	-3.31438
CLMN	2.1697	2.43098	1.18522	0.797211	-0.805066	-0.927484	-0.541642	-0.927927	1.99878	-1.20278	-0.505582	-0.282399	-1.9335	-1.61128	0.185156	-2.42206	0.511856	1.44124	0.0570677	-0.395627	-0.553544	1.244	-2.06753	-0.942855	-2.18241	-0.981056	-4.54844	-0.760498	-1.45384	-0.364744	-1.07711	-0.983393	-1.16909	-1.08116	-2.681	-4.95608	-4.17868	1.45151	0.237558	-5.19662	-1.32021	-6.36516	-3.10527	-0.605092	-0.0383762	-3.53124	0.119445	-2.20201	-1.08409
COL1A1	6.36098	5.128	4.64888	5.46783	6.13314	6.3636	2.6042	2.4133	6.15969	8.49071	5.1145	4.04592	2.64285	6.82074	5.23379	5.43565	4.54228	5.61566	6.63001	5.03688	3.96233	4.75619	6.2005	6.57722	5.192	6.23811	6.04682	6.44349	4.56083	5.83614	2.09208	2.15825	3.59733	5.20825	4.8917	5.63872	5.49816	4.79343	4.13919	5.25562	6.42759	6.16159	4.67298	5.99413	6.90721	4.33981	6.27756	7.45337	4.06199
COL4A1	2.14673	0.0435757	2.64042	0.627656	2.23056	0.786212	-0.717446	0.238809	2.97596	2.97602	-0.16653	1.34462	-0.870492	3.82752	1.4702	-0.544145	-0.269134	3.52632	4.76468	3.31978	0.488277	0.975508	2.91432	1.65276	0.286355	3.14823	5.64139	2.96197	-1.45384	1.26394	-1.67537	0.157033	1.05844	1.744	2.08718	1.22383	1.27528	2.48468	1.54896	2.11627	1.88234	2.50212	0.663613	1.67344	2.35721	-0.428144	2.24498	2.80921	-0.259937
COL4A2	2.54821	2.83613	3.66566	4.89561	2.47292	3.93209	2.40264	2.11946	5.43628	3.34497	2.72123	3.89299	1.56976	4.05761	3.66858	2.75732	1.60903	5.52553	6.59623	3.69184	3.05194	2.73524	3.35873	4.11026	1.60642	3.27108	6.64015	4.19742	3.28958	2.79031	2.36477	0.0536692	3.70865	2.63368	2.76608	1.79547	3.58453	3.00824	1.44204	3.14768	2.29623	3.00335	1.50167	2.515	3.2593	1.43668	3.76282	3.10177	0.692535
COL5A2	0.0916925	0.662486	1.97249	0.218161	2.51205	0.672786	-1.15404	0.366349	2.3678	3.96714	-0.16653	-0.756057	-0.870492	3.51801	0.908047	-0.544145	-1.54114	2.9334	1.44173	0.687514	-0.553544	-0.372416	3.0171	1.47218	0.402548	2.40361	2.03653	2.33711	-1.33209	1.16748	-0.481159	-0.603644	-2.32109	1.75283	2.14554	1.2436	-0.563968	1.61021	-0.0439561	2.44001	2.38999	2.44541	0.0391226	1.86402	2.6354	-0.498222	2.36045	3.15554	0.879994
COL8A2	-3.8152	-2.59385	-1.96162	-1.73825	-2.71196	-0.927484	-0.241618	-0.0560662	-2.80212	0.212257	-0.949619	-2.38969	-0.537916	-3.61128	-6.50134	-3.12567	-1.14835	-2.49287	-5.69782	-2.37138	-3.05604	-1.40864	-1.02022	-1.43471	-1.98977	-2.15098	0.661017	-3.08243	-2.10851	-1.89526	-2.71601	0.505478	-3.16909	-2.60472	-1.28869	-1.25564	-0.85675	-4.97475	-2.11754	0.531303	-0.853086	-0.0432288	-2.54584	-0.775017	0.350666	-2.37923	-0.214456	-0.429423	-1.3424
COPZ2	-2.23024	-0.763779	-4.76897	-3.22368	-1.71196	-1.60787	-0.717446	-1.26345	-3.48019	0.212257	-1.59439	-1.46593	-0.537916	-1.61128	-3.17942	-1.31831	-1.78661	0.427696	-1.23839	-1.75471	-1.47108	-1.73669	-0.582103	-1.91115	-1.86049	-1.15098	-1.37851	-1.49746	-1.21213	-1.63222	-1.34545	-0.603644	-2.32109	-0.112872	-2.09604	-2.09809	-7.76364	-4.97475	-2.11754	1.5313	-1.36328	-1.5578	-3.26573	-1.17015	-1.26077	-2.37923	-0.214456	-0.465047	-1.88554
CRAT	-0.400161	0.0435757	-0.447045	-0.0431041	-0.319639	-1.35411	-1.7831	-1.26345	-0.592667	4.16451	-3.36222	-1.06777	-0.870492	1.47619	-0.946755	-1.31831	-0.70189	-2.71526	-1.23839	-0.395627	-3.05604	-2.83185	3.10239	-0.849745	-1.70437	-1.34363	-0.548436	0.150235	-1.10851	-0.92768	-0.188868	-0.603644	-0.906057	-5.60472	-0.823024	-2.00188	-4.17868	-0.219867	1.04866	0.125311	-1.70724	-2.36516	-2.96088	-1.47734	-5.43069	-1.46595	-2.47749	2.63509	-1.23346
CRIP1	5.74704	2.34475	3.88566	5.85038	1.51686	1.64395	1.41701	1.03824	6.56092	3.07851	3.82921	3.1064	0.332393	3.31946	3.18865	1.91058	1.16307	4.90557	4.09497	3.19544	1.54882	0.975508	5.47111	3.66595	4.18141	5.98729	1.8266	5.70024	3.45154	2.64493	1.16873	1.5935	4.04426	1.79615	1.57638	2.10462	2.21935	2.63258	3.04116	1.78066	3.06197	4.29216	-0.134026	3.34046	2.58611	3.86076	3.79863	4.93669	1.68562
CRISPLD2	-5.40016	-0.763779	0.785616	-1.33615	0.146024	-1.12508	-1.43685	0.48472	0.220248	0.649662	-1.08786	-0.756057	-0.265123	-1.28935	-0.547148	-1.96033	-0.833918	0.343632	0.0570677	0.960135	-1.47108	-0.898962	1.18545	0.704844	-0.208409	0.978302	0.206452	0.239502	-1.59679	-0.187439	-1.07711	0.157033	-2.12179	-0.0501359	-0.395602	-1.40149	-4.17868	-1.27431	-0.775618	0.125311	0.679788	0.700932	-1.89376	0.711483	0.297227	-2.15684	0.400254	1.46095	0.798957
CSGALNACT1	-3.8152	-2.59385	-0.521045	-1.73825	-2.9046	-0.331026	-1.7831	-0.0560662	-2.21716	0.119147	-0.605887	-2.01772	-3.05903	1.74628	-2.33142	-1.96033	-2.0826	-0.656368	-1.23839	0.997855	-1.18157	-1.73669	0.292366	-1.73427	-1.70437	-1.98106	-0.963473	-0.194901	-1.92123	-1.43292	-2.10383	-0.983393	-1.16909	-1.3568	-1.59354	-2.63415	-1.71925	-0.330898	-0.334349	1.44724	-1.40767	-1.32076	-1.20345	-1.57862	-5.43069	-1.33193	-0.941437	-1.08654	-0.507029
CTGF	1.91272	1.78312	6.59735	2.81121	2.20093	2.31984	-0.920895	-1.70145	5.16727	3.84161	-0.328497	3.83061	-0.0381064	3.51801	1.11337	-1.08503	-0.469346	4.20757	3.98693	3.28206	0.403388	4.4909	4.02276	2.68423	1.55713	4.05847	2.99072	3.0261	0.756844	2.25855	-0.062295	0.785923	0.0325425	3.31115	2.77021	1.9598	2.73221	2.54095	3.58032	4.23592	4.19688	3.71032	2.23552	3.91265	5.39903	1.61021	4.08704	4.67757	3.92034
CTNNB1	3.61665	2.51699	5.70473	-0.193929	3.87676	-0.331026	-2.24765	-0.655897	3.56857	3.28551	-1.59439	3.07743	-1.9335	3.72411	0.933284	-4.55451	-0.174755	4.22138	3.87204	3.41522	-0.553544	0.021604	3.71558	1.97043	0.917122	4.53727	4.27493	2.7352	-2.34045	1.29237	-2.71601	0.505478	0.731373	3.80254	3.92447	1.74436	0.740186	3.88633	1.64849	4.70425	3.83312	3.11462	3.67471	2.3195	4.77998	0.518006	3.31952	3.30842	2.84781
CTSL2	-3.8152	-5.76378	-4.76897	-1.02204	-5.71196	-7.89327	-1.7831	-3.48451	-5.80212	-5.37271	-0.949619	-1.24834	0.626922	-1.28935	-6.50134	-0.879912	-1.33142	-3.71526	-5.69782	-5.27827	-3.05604	-1.73669	-5.97442	-6.43471	-6.98977	-5.15098	-4.54844	-2.08243	-2.10851	-0.566933	-1.07711	-0.783392	-2.32109	-5.60472	-5.681	-6.95608	-2.47824	-4.97475	-3.15148	-5.19662	-6.40767	-6.36516	-7.35319	-3.77502	-5.43069	-4.19866	-1.75502	-5.78698	-7.01482
CUBN	-5.40016	-2.59385	-2.18401	-0.553138	-5.71196	0.0840116	-1.15404	-1.70145	-2.21716	-3.37271	-1.08786	-1.06777	-0.537916	-4.61128	-3.69399	-0.544145	-0.985921	-3.71526	-0.790929	-2.95634	-0.734116	-0.691366	-5.97442	-3.11278	-2.81984	-2.82905	-4.54844	-5.40435	-1.45384	-1.23736	-1.67537	0.505478	-2.82805	-5.60472	-5.681	-6.95608	-4.17868	-4.97475	-2.11754	-5.19662	-6.40767	-6.36516	-7.35319	-0.967662	-5.43069	-3.0382	-1.75502	-5.78698	-5.01482
CXCL3	1.78966	-1.85689	-4.76897	-2.29768	-5.71196	0.172821	-0.717446	-0.655897	-5.80212	-5.37271	-0.0209245	-1.06777	-0.870492	-1.28935	-2.33142	-1.08503	-1.33142	-5.30022	-5.69782	-3.95634	-3.05604	-0.523095	-5.97442	-3.62735	-3.53034	-2.34363	0.975126	-0.944923	-1.10851	-0.92768	-0.062295	-0.783392	-1.9467	-5.60472	-3.09604	-3.78615	-1.71925	-2.38979	-1.00464	-2.38926	-4.40767	-4.78019	-0.598307	-2.35998	-5.43069	-0.90242	-2.99206	-5.78698	-1.92736
CXCL5	1.59984	-5.76378	-4.76897	-2.29768	-5.71196	-0.753717	-0.920895	-1.70145	-4.21716	-3.37271	-0.830204	-2.38969	-3.05903	-4.61128	-3.69399	-1.96033	-0.985921	-5.30022	-5.69782	-5.27827	-4.64101	-1.40864	-5.97442	-3.62735	-3.98977	-1.34363	-0.741081	-5.40435	-2.90874	-3.06518	-1.67537	-1.50027	-4.26863	-3.2828	-2.09604	-0.401486	-7.76364	0.382798	-7.5438	-5.19662	-5.40767	-6.36516	-1.96088	-7.35998	-5.43069	-5.70116	-6.79942	-5.78698	-4.01482
CXCR1	-5.40016	-4.17882	-4.76897	-3.22368	-5.71196	-7.89327	-1.15404	-0.427114	-5.80212	-5.37271	-2.81678	-5.6698	-1.9335	-4.61128	-2.69399	-2.42206	-1.54114	-5.30022	-5.69782	-6.27827	-0.940567	-2.83185	-5.97442	-6.43471	-3.53034	-5.15098	-4.54844	-5.40435	-2.90874	-3.92768	-9.84529	-1.50027	-7.07598	-5.60472	-5.681	-6.95608	-7.76364	-4.97475	-3.15148	-5.19662	-6.40767	-6.36516	-7.35319	-5.77502	-5.43069	-3.53124	-1.51402	-5.78698	-7.01482
CXCR2	-5.40016	-4.17882	-4.76897	-0.773015	-5.71196	-1.12508	-1.7831	0.48472	-5.80212	-5.37271	-0.505582	-1.24834	-0.265123	-4.61128	-1.17942	-0.700362	-0.0897573	-5.30022	-3.11286	-5.27827	-0.734116	-1.40864	-5.97442	-6.43471	-3.08288	-5.15098	-4.54844	-5.40435	-1.21213	-0.802149	-0.327624	-0.175272	-2.12179	-5.60472	-5.681	-6.95608	-4.17868	-4.97475	-2.84336	-5.19662	-6.40767	-6.36516	-5.76823	-7.35998	-5.43069	-1.76256	-2.47749	-5.78698	-7.01482
CXorf61	-5.40016	-0.515852	1.16176	-1.33615	-3.39003	-1.35411	-0.717446	-0.927927	-1.4098	-5.37271	-0.949619	-1.46593	0.160011	-4.61128	-2.69399	-0.544145	-1.78661	-1.0523	0.568967	-1.75471	-0.734116	-2.20382	-5.97442	-4.43471	-1.59745	0.521444	-4.54844	-2.08243	-1.74435	-0.566933	-0.188868	-0.0548553	-0.110198	0.123196	-5.681	-6.95608	-1.71925	-4.97475	-2.33435	-0.152223	-2.40767	-6.36516	-1.68077	-2.19005	-1.5238	-1.59962	-1.30757	-5.78698	0.0185989
CXXC5	2.72912	-1.06334	-0.768973	-3.22368	0.0159638	-0.753717	-1.43685	-0.427114	0.9258	0.984846	-0.605887	-1.06777	-1.30345	1.91229	-0.719984	-0.400083	0.066546	0.223338	-0.449892	0.56722	-0.553544	-1.12135	1.9204	-0.653348	-1.28933	-1.06352	2.08092	1.89943	-2.10851	-0.101709	-0.85094	-0.603644	-2.55242	-0.650528	-0.980565	-1.07343	-2.47824	-2.65283	0.439192	0.531303	-0.476937	0.362764	0.0391226	-0.394195	-0.476497	-1.20931	0.684397	1.42248	0.0619915
CYBB	2.7445	0.190417	2.90345	0.0934347	1.65437	-0.0106253	0.312928	-0.927927	2.74863	1.15086	-0.0209245	-0.00955055	-0.537916	1.74628	-0.547148	0.331889	-0.269134	2.50713	1.17254	1.59825	0.644396	-0.898962	1.92645	2.16148	1.51406	0.755909	2.05148	1.39006	-0.108507	0.242245	0.163135	0.251206	0.0737652	1.69906	2.6182	3.05375	-0.112588	2.99103	0.439192	2.57817	1.91875	0.517486	1.01313	1.59131	2.36372	-0.131307	1.91483	2.05851	2.8416
CYTH1	2.88061	2.92272	2.78562	0.439289	1.86547	0.545524	-0.920895	-0.655897	1.89137	2.27835	-0.0209245	2.20232	0.626922	2.69251	1.16399	-2.42206	-1.14835	1.15921	3.45447	2.66131	-0.553544	1.0881	2.62177	1.66858	-0.0709058	2.30023	2.91917	1.21036	-0.0559118	-0.0295596	-1.07711	-0.175272	1.29034	1.79615	2.20774	1.29659	1.03078	3.5171	1.50332	1.85867	1.82594	2.62069	-0.00446671	1.4538	2.36372	0.682542	0.873007	2.38295	2.09108
DACT1	-3.8152	-4.17882	-4.76897	-0.193929	-0.75776	-0.927484	0.00662595	-0.229694	-1.21716	0.485275	-0.830204	-1.70897	-1.30345	0.0891643	-0.828919	-0.879912	-0.580938	-3.30022	-0.174258	-1.10834	0.00284971	-1.12135	-0.482568	-2.43471	-4.98977	-0.829053	-4.54844	-0.275071	-1.45384	-1.43292	-1.07711	0.34175	-1.16909	-1.21241	-0.726808	-2.00188	-1.71925	-4.97475	-0.0439561	-5.19662	-0.407675	0.442198	-1.82963	0.0994522	-0.0383762	-2.37923	-0.532632	0.279114	-1.58856
DDIT4	0.0916925	2.03064	1.65729	1.62432	2.38608	0.477419	-0.113081	-2.33344	3.34254	3.45702	-0.328497	-0.282399	-0.0381064	4.26217	1.31244	-1.31831	-0.833918	3.38628	0.960392	1.35835	-0.248689	-0.898962	1.97978	2.59872	-2.34591	3.2499	4.51765	1.8051	-0.591793	1.74988	-1.07711	-0.303311	1.99816	2.55009	2.72414	-0.868612	-0.563968	2.24441	0.800494	2.39584	0.412504	1.18943	2.11848	-0.441116	2.66734	-0.131307	0.400254	1.00744	1.45685
DDX21	-0.190707	-0.763779	-0.0140852	-2.29768	-0.188395	-1.12508	-9.73147	-1.26345	-2.48019	-0.243423	-2.07982	-1.46593	-0.870492	0.476187	-1.64336	-1.96033	-1.33142	-1.84079	-1.89046	-0.470915	-1.18157	-2.83185	-1.02022	-1.57673	-2.18241	0.492875	0.877829	-0.194901	-2.34045	-1.08333	-2.10383	-1.50027	-2.32109	0.871009	-0.288687	-3.49664	-2.47824	1.32903	-2.11754	-0.44173	-0.363281	-1.66472	-1.96088	-1.90055	0.028738	-2.37923	-2.09898	0.422478	-1.46024
DEGS2	1.78966	1.41613	-3.18401	1.21151	-4.71196	0.545524	1.23432	1.37799	-0.994765	1.85611	1.07399	0.291028	1.98763	0.196079	0.908047	1.12875	1.1973	0.159208	-1.89046	-0.956342	0.850847	0.79087	0.739825	-0.0596682	-0.881245	-1.56602	0.258919	2.70939	0.866277	1.35098	1.91833	2.05628	0.439718	-1.90429	-5.681	-2.43251	-0.320697	-4.97475	-0.17748	-1.49618	-3.23775	-1.11723	-1.399	-3.19005	-5.43069	-0.6495	1.08322	-0.394658	-2.20747
DHRS2	-5.40016	-5.76378	-4.76897	-0.362383	-5.71196	-0.45864	-0.920895	-0.655897	-5.80212	4.52363	-1.24075	-1.46593	-0.537916	-4.61128	-6.50134	0.410385	0.207558	-5.30022	-1.89046	0.830255	-0.734116	0.126574	-5.97442	-0.50397	-3.53034	-5.15098	-4.54844	4.87293	-2.34045	-1.43292	0.0540637	-0.603644	-2.55242	-5.60472	-5.681	-6.95608	-1.22448	-4.97475	5.02201	-5.19662	-6.40767	2.75378	-7.35319	-5.03805	-5.43069	-1.76256	-2.09898	-2.08654	-7.01482
DNAJC12	-5.40016	-0.763779	-2.18401	-0.773015	-5.71196	-0.220843	-0.717446	0.0988923	-5.80212	-0.565351	-0.71369	-0.625407	0.487962	-4.61128	-1.45695	-0.879912	-0.0897573	-2.30022	-1.89046	-6.27827	0.113881	-2.20382	-5.97442	-1.57673	-2.59745	-5.15098	-0.741081	-0.497464	-1.01183	-1.08333	-0.481159	0.251206	-1.37554	-0.746744	-5.681	-4.95608	-1.22448	-4.97475	-2.33435	-2.38926	-6.40767	-1.90573	-2.82963	-5.77502	-5.43069	-3.0382	-1.51402	-3.46505	-7.01482
DOPEY1	-5.40016	-5.76378	1.64042	-1.02204	-1.18839	-0.753717	-2.24765	-2.33344	-5.80212	-1.91327	-2.40175	-3.72227	-0.537916	-4.61128	-6.50134	-1.6039	-1.54114	-3.71526	-1.23839	-2.19081	-1.47108	-2.20382	-1.33056	-3.62735	-3.98977	-0.244091	-4.54844	-3.08243	-1.59679	-2.17766	-1.34545	-0.783392	-4.26863	-3.2828	-1.681	-3.25564	-7.76364	-2.38979	-1.63691	-0.44173	-4.08575	-3.5578	-3.76823	-2.90055	-2.62334	-3.53124	-3.99206	-3.20201	-1.65727
DSC2	2.83346	4.32368	5.01075	0.627656	2.88796	1.92372	-0.920895	-0.427114	3.26934	1.68258	0.671503	1.92586	-0.265123	2.00343	2.71782	-0.400083	-0.174755	4.931	3.72844	0.744098	1.14035	2.36515	-0.845138	2.00824	-0.208409	3.28781	6.24028	0.917574	2.79266	2.33228	-0.85094	0.84752	2.50145	2.744	1.04692	0.838341	2.14024	4.18512	0.0855546	3.31514	2.34052	0.429259	0.973235	2.83478	3.29041	-1.00072	2.31172	-0.928994	1.47703
DUSP4	2.72912	0.323684	-4.76897	0.332957	-5.71196	0.40594	0.00662595	-0.427114	-0.247531	0.408654	-0.505582	0.219811	-1.9335	2.31946	-1.04191	-4.55451	0.763017	2.23893	-1.23839	0.0615801	0.00284971	0.021604	2.89286	0.598715	0.675567	0.630378	-4.54844	2.05508	-0.270863	1.06822	-0.653	-1.50027	-0.988519	-2.2828	-5.681	-1.86861	-1.71925	-4.97475	1.27638	-1.49618	0.177288	1.48659	2.87803	-1.3827	-5.43069	1.03806	1.99824	0.167221	-0.657272
DUSP6	0.154428	-0.119923	0.72288	-6.5456	-1.12699	0.256479	-0.241618	-2.33344	-1.21716	0.797219	-2.81678	-0.756057	0.160011	2.69251	-1.33142	-1.6039	-0.985921	0.507131	-0.790929	1.93118	-1.83365	-1.40864	1.94444	-2.43471	-1.28933	2.02893	0.0365266	0.683109	-2.10851	-0.456374	-0.481159	-0.0548553	-2.32109	-0.746744	-0.681005	-1.09809	-7.76364	-0.582437	0.533014	-5.19662	0.636719	1.38304	0.65243	-0.716123	0.613701	-1.59962	-0.126993	-0.202013	0.114459
ECM2	-3.8152	-4.17882	0.985915	-3.22368	-2.54203	-0.598648	-0.717446	-0.655897	-2.80212	0.212257	-0.605887	-0.756057	-1.30345	-4.61128	-1.33142	-1.08503	-0.0897573	-1.1303	-0.790929	-1.63441	-0.553544	-1.40864	-1.11644	-2.43471	-1.59745	-2.34363	-3.54844	-1.08243	-0.391679	-0.92768	-0.062295	0.34175	-2.32109	-4.60472	-5.681	-3.49664	-2.47824	-4.97475	-1.10086	-0.152223	-0.915822	-1.78019	-3.76823	-3.19005	-4.43069	-2.37923	-1.51402	-0.429423	-1.65727
EDN1	-5.40016	-5.76378	-1.30954	-1.33615	-0.667563	-1.93907	-1.7831	-0.927927	-1.10168	-3.37271	-1.59439	-2.89219	-0.537916	-0.803921	-4.91638	-2.42206	-0.269134	-5.30022	-3.11286	-6.27827	-4.64101	-1.40864	-2.8045	-6.43471	-3.53034	-3.56602	-4.54844	-5.40435	-3.90874	-3.92768	-3.82293	-1.50027	-2.55242	-5.60472	-2.09604	-6.95608	-2.47824	-4.97475	0.0411605	-5.19662	-2.94824	-1.5578	-3.54584	0.115754	-0.675806	-5.70116	-0.941437	-0.295122	-7.01482
EFNA1	2.89446	2.37065	3.93839	2.90629	2.17069	2.98708	0.486491	-1.70145	3.16655	2.4152	2.51247	-0.756057	0.871398	2.88058	1.53208	-1.31831	0.456408	2.0217	3.96039	1.7441	1.89815	1.33808	2.81999	2.21993	0.043654	2.30845	1.56009	2.64004	0.293978	2.703	-0.85094	0.34175	3.26942	2.04633	2.543	-2.31222	1.119	2.20515	0.848515	2.23801	1.80664	2.16232	1.66917	1.43118	3.36372	-1.59962	1.15478	0.871236	1.37749
EGF	-5.40016	-0.515852	-4.76897	-0.0431041	-5.71196	-0.598648	-0.920895	-0.427114	-5.80212	-5.37271	-0.505582	-1.46593	0.487962	-4.61128	-1.33142	-0.700362	-0.36577	-5.30022	0.711571	-0.693307	-1.83365	1.03515	-5.97442	-1.91115	-3.53034	0.779756	-4.54844	-4.40435	-2.10851	-0.101709	0.681206	0.505478	-2.32109	-4.01976	-5.681	-4.14872	-4.17868	-4.97475	-0.17748	-5.19662	-4.82271	-2.04323	-1.68077	-3.55262	-1.10877	-1.20931	-1.51402	-3.20201	-3.42986
EGFR	-0.190707	-5.76378	2.52565	-3.22368	-3.39003	-1.93907	-9.73147	-1.26345	-0.847924	4.43947	-1.4118	-0.899727	-1.30345	3.30759	-1.85749	-1.6039	-0.269134	-0.393333	-0.790929	-0.108345	-0.734116	-0.22519	-2.06753	3.87249	-4.98977	-0.758664	0.358455	-5.40435	-2.59679	-1.89526	-0.85094	-0.175272	-2.55242	-0.4348	-2.51108	-2.63415	-0.85675	0.310648	-0.929092	-0.152223	-1.54969	-1.07975	-1.33083	-1.42924	-0.730254	-1.76256	-0.799418	-3.46505	-1.18193
EGR1	1.27226	1.2915	1.18522	0.0934347	-5.71196	0.786212	-1.7831	-0.229694	-0.247531	1.85611	-1.81678	0.148553	-1.30345	1.51801	-1.33142	-0.879912	-0.70189	1.09209	1.07036	1.74964	-1.18157	0.323431	1.14452	-0.0596682	-0.45061	1.40361	0.773492	1.35053	-1.10851	0.182744	0.163135	-0.447525	0.806661	-0.212407	-3.681	-1.34137	-0.85675	-0.974754	2.27797	0.531303	1.01859	2.19709	2.22234	-0.160307	1.69859	0.291304	1.59719	1.17881	0.746727
ELK3	-0.815198	-0.515852	-4.76897	-1.02204	-1.54203	-0.753717	-0.241618	0.238809	-3.48019	-0.565351	0.0430386	-1.46593	0.160011	-0.803921	-6.50134	-0.700362	0.338676	-1.9783	-0.790929	-0.347533	-0.117445	-0.372416	-1.5821	-1.14931	-4.98977	-0.758664	-1.54844	-0.082426	-0.523544	-0.802149	0.0540637	0.424925	-1.61655	-2.01976	-1.03715	-2.20119	-2.47824	-1.1674	-0.636911	-0.44173	-1.12227	-0.637236	-0.893763	-2.03805	-3.84573	-1.20931	-0.532632	-0.232386	-1.58856
ELOVL5	0.154428	-0.515852	3.49312	-0.773015	2.57806	0.256479	-0.717446	-1.70145	2.01806	4.92765	-1.4118	-3.72227	-0.0381064	4.4575	-0.45695	-1.31831	-0.469346	1.8896	1.85677	2.18116	-0.553544	-0.523095	3.48706	0.49603	1.35896	1.8263	3.25892	2.68311	-1.33209	1.54067	-0.85094	0.0536692	-0.536823	3.53227	2.1199	2.14196	-1.71925	3.20515	4.46568	3.85595	2.57817	2.00117	0.460586	1.77701	2.9787	-0.6495	2.43899	3.97291	2.09108
ELOVL6	-0.400161	-4.17882	0.0383822	-2.29768	-2.71196	-1.35411	-1.43685	-2.33344	-3.48019	-1.91327	-1.24075	-3.72227	-3.05903	-3.61128	-2.69399	-1.6039	-0.985921	-3.71526	-3.11286	-1.81884	-0.734116	-0.523095	-0.2465	-6.43471	-2.81984	-0.627419	-0.0890043	-4.40435	-2.34045	-5.80215	-0.653	-0.447525	-2.32109	-1.21241	-5.681	-2.43251	-7.76364	-0.274315	-4.22187	-5.19662	-6.40767	-3.78019	-2.96088	-3.55262	-2.84573	-3.0382	-1.75502	-1.97962	-7.01482
EPPK1	1.70836	1.00441	1.88924	0.538318	0.417326	0.256479	-0.717446	-0.427114	0.689733	1.56981	-0.505582	-0.282399	-0.870492	0.55865	0.240123	-0.544145	0.066546	-5.30022	1.35746	1.64059	-1.47108	0.975508	2.33846	0.293213	-1.18241	2.94705	-4.54844	0.618014	-0.83008	-0.187439	-0.327624	0.34175	-0.754054	-0.517262	0.640923	-2.43251	0.507823	3.01393	1.18412	-5.19662	0.721608	1.32833	-1.399	0.032338	0.184016	-1.20931	1.54488	-0.202013	-0.491262
ERBB2	3.20347	1.08171	2.31849	0.875058	2.13979	0.732441	-0.920895	0.238809	3.45997	3.96045	-0.091891	0.536864	-0.0381064	4.12004	1.4702	0.15656	0.976867	1.64229	1.52135	2.58282	0.644396	1.76671	6.864	1.75017	5.17357	1.44893	2.51765	3.07946	-0.591793	1.46151	-0.481159	0.505478	1.03776	0.949864	1.16449	-0.581036	0.628677	0.725685	3.4299	2.70425	0.78215	6.41477	0.691199	3.16162	2.21316	-1.20931	1.86947	2.44184	0.485022
ERBB3	4.09169	3.51002	4.14092	0.875058	2.01596	0.330733	-1.15404	-0.655897	1.4267	1.71476	-0.830204	1.0167	-0.0381064	2.59818	-0.161494	-1.31831	-0.833918	1.9477	1.5968	2.83025	0.31319	0.975508	3.08086	-1.57673	-1.98977	2.50007	1.40576	2.76055	-1.33209	0.716176	-0.85094	-0.175272	-0.361736	1.02463	1.94835	-6.95608	-2.47824	2.46819	1.60595	-5.19662	1.22895	1.87802	0.224234	0.453802	2.77876	-0.723882	1.29861	2.24645	1.17993
ERBB4	-5.40016	-1.44185	-4.76897	-1.73825	-5.71196	-0.927484	-1.15404	-1.26345	-4.21716	-3.37271	-0.71369	-1.70897	-0.0381064	-3.61128	-1.45695	0.15656	-0.580938	-3.71526	-5.69782	-4.69331	-0.734116	-0.523095	-2.97442	-1.04239	-1.49792	-5.15098	-4.54844	-0.760498	-0.914969	-1.08333	0.945055	0.652504	-1.37554	-4.60472	-5.681	-2.78615	-1.22448	-4.97475	-1.29587	-0.152223	-6.40767	-4.78019	-2.14374	-2.90055	-5.43069	-0.571879	-0.799418	-2.97962	-3.8449
ERCC6	-1.40016	-1.85689	0.903453	-1.02204	-2.54203	-0.331026	-1.7831	0.0988923	-3.48019	-5.37271	-0.71369	-1.70897	-0.870492	0.848156	-2.33142	-0.879912	-1.54114	-1.71526	0.256377	-0.786417	-3.05604	-1.73669	-0.886958	-3.11278	-3.53034	0.058472	-0.548436	-1.31689	-1.59679	-1.08333	-1.67537	0.251206	-2.55242	-0.960869	-0.51108	-1.25564	-1.22448	-1.38979	-1.18625	-0.44173	-2.23775	-1.78019	-2.65276	-1.57862	-1.73025	-3.53124	-0.307565	-1.61705	-1.08409
ESD	1.0261	-0.119923	2.19681	-1.02204	0.714308	-1.60787	-0.920895	-0.0560662	0.10477	-0.124778	-2.40175	-1.46593	-0.537916	1.78104	-2.69399	-4.55451	-1.33142	-1.71526	0.256377	1.00713	-0.940567	-0.691366	1.23503	-0.849745	-1.49792	1.86025	2.51765	0.377006	-1.45384	-3.06518	-0.653	-0.983393	-1.9467	0.887128	0.273192	-0.581036	-2.47824	2.81966	0.163557	1.12531	0.511188	-0.410961	0.51717	-0.967662	0.427287	-1.76256	0.266671	0.688758	-0.107934
ESR1	-5.40016	-5.76378	-4.76897	-8.13057	-5.71196	-0.220843	-0.920895	-1.26345	-5.80212	-3.37271	-1.59439	-2.01772	-0.265123	0.295615	-2.69399	-2.42206	-0.985921	-5.30022	-5.69782	-1.32407	-0.940567	-1.73669	-0.389458	-1.91115	-6.98977	-1.45054	-4.54844	-3.08243	-1.92123	-7.38711	-1.07711	-0.0548553	-2.55242	-0.79737	0.12635	-2.43251	-4.17868	-4.97475	-2.11754	-5.19662	-6.40767	-6.36516	0.674711	-4.19005	-4.43069	-3.53124	-2.47749	-1.88008	-2.8449
ETS2	4.07557	1.2915	2.57976	0.439289	0.974544	-0.331026	-1.7831	-0.229694	0.898319	1.75658	-1.24075	-0.899727	-0.265123	2.67413	-1.33142	-1.08503	-0.469346	1.68846	0.711571	1.15636	-0.248689	0.41608	1.31098	-0.225254	-0.667841	1.60391	1.62149	1.99653	-1.59679	-0.672866	-0.85094	0.157033	-1.37554	1.13674	1.16449	-0.0372119	-1.71925	2.61021	1.71359	2.78066	1.15457	0.249553	-0.798606	0.824896	1.35067	-0.0766713	0.329865	1.10784	0.242564
ETV1	-5.40016	-2.59385	0.985915	-1.73825	-5.71196	-1.60787	-2.24765	-1.70145	-4.21716	-1.91327	-2.40175	-1.24834	0.160011	-0.803921	-3.69399	-1.96033	-2.47402	0.343632	-1.89046	-3.27827	-3.05604	-2.83185	-4.97442	-6.43471	-6.98977	-1.45054	-4.54844	-1.49746	-1.45384	-1.23736	-0.653	-1.50027	-7.07598	-5.60472	-5.681	-3.78615	-1.22448	-4.97475	-2.33435	-0.44173	-5.40767	-2.27769	-0.753282	-1.42924	-5.43069	-3.53124	1.29861	-5.78698	-2.7669
ETV4	0.50673	0.445674	-1.59905	-1.02204	-5.71196	-1.93907	-0.717446	-1.26345	-5.80212	-0.124778	-1.4118	-0.499876	0.160011	-0.151844	-6.50134	-1.96033	-1.14835	-5.30022	-0.790929	-1.63441	-0.553544	-7.29128	0.0699732	-1.04239	-3.98977	0.936481	-4.54844	-5.40435	-2.10851	-1.89526	-1.34545	-0.175272	-4.26863	-3.01976	-5.681	-2.43251	-2.47824	-0.804829	-3.15148	-5.19662	-3.40767	-3.04323	-0.223912	-0.140811	-2.10877	-4.19866	-0.214456	-4.20201	-7.01482
ETV5	-5.40016	-0.763779	-1.06853	-1.33615	-5.71196	-2.98638	-2.92411	-1.70145	-2.80212	-1.91327	-1.81678	-2.89219	-0.537916	-3.61128	-4.91638	-2.42206	-1.78661	0.343632	-0.449892	-0.30099	-1.83365	-1.40864	-5.97442	-1.91115	-4.98977	0.0189436	-4.54844	-5.40435	-3.34045	-2.57976	-2.10383	-0.0548553	-2.82805	-1.3568	-4.09604	-3.49664	-4.17868	-4.97475	-4.22187	-5.19662	-2.82271	-6.36516	-0.203448	-1.25145	-1.43069	-5.70116	-0.649671	-3.78698	-3.10793
EXO1	-0.54218	-0.515852	1.49781	-0.362383	0.0159638	-1.35411	-0.241618	-0.427114	-2.80212	0.0196118	-2.07982	-0.499876	-0.870492	0.196079	-0.109027	-0.269109	-0.0897573	0.159208	0.256377	0.72173	-1.83365	-2.83185	-1.5821	-1.57673	-1.98977	1.07784	0.910996	-0.194901	-2.10851	-0.566933	0.163135	-0.447525	0.227799	0.838219	-0.25474	-0.889986	-0.112588	1.2347	-1.29587	0.531303	-1.40767	-1.45827	-2.54584	-1.80539	-0.343231	-1.33193	-0.532632	-1.46505	-6.01482
FAM162A	2.30028	0.190417	1.73882	-1.02204	2.54071	0.172821	-0.384953	-2.33344	1.18656	0.327734	-1.08786	-3.72227	-1.30345	3.08916	-0.109027	-0.544145	-0.580938	1.51995	1.44173	0.777013	-1.83365	-0.523095	0.400619	0.598715	-0.881245	2.34087	3.74618	2.96197	-1.92123	0.182744	-1.07711	0.424925	0.589354	2.77465	1.7866	0.461777	-1.22448	1.50098	0.237558	2.70425	0.00171614	0.0442341	0.821731	-0.775017	2.0771	-0.90242	0.200582	2.03957	0.175
FAT4	-2.8152	0.323684	-0.961618	-0.553138	-5.71196	-0.331026	-0.384953	-0.427114	-5.80212	-0.980388	-1.08786	-0.625407	0.332393	-2.61128	-1.04191	-0.269109	0.338676	-0.599784	-3.11286	-2.95634	0.00284971	-0.691366	-2.51499	-2.11278	-3.08288	-2.56602	-4.54844	-3.08243	-0.83008	-1.43292	-0.062295	0.719932	-1.61655	-2.14529	-5.681	-2.95608	-1.71925	-4.97475	-0.44577	-0.874689	-3.40767	-2.27769	-3.76823	-3.90055	-5.43069	-1.46595	-0.941437	-1.97962	-1.55539
FBN1	-1.15223	-0.304348	0.185224	-0.773015	0.573446	-1.35411	-2.24765	-0.927927	1.16366	2.63852	-0.949619	-1.06777	-0.265123	1.81499	-0.372061	-1.31831	-0.36577	1.20757	1.26796	-0.0303424	-1.47108	-1.40864	1.62549	0.293213	-0.497916	0.978302	2.13806	0.572926	-0.914969	0.470869	-1.34545	-0.447525	-1.9467	0.176635	-0.126416	-0.269575	-2.47824	-1.97475	0.0855546	1.71027	1.32025	1.35594	-1.14374	0.115754	1.16922	-0.723882	0.962133	1.74441	0.083208
FERMT1	3.78719	-0.304348	-4.76897	-0.193929	0.354133	-1.60787	-0.384953	-0.655897	-3.48019	-1.91327	-0.71369	-2.01772	-1.9335	2.24671	-0.45695	-0.400083	-1.14835	-2.30022	0.0570677	-3.47091	-1.47108	-0.101454	-5.97442	-1.14931	-2.34591	-3.15098	2.47393	-3.08243	-1.21213	-0.92768	-0.653	-0.603644	-0.828054	0.461364	-5.681	-1.78615	-4.17868	-3.38979	-3.63691	0.125311	-0.707235	-6.36516	-2.06779	-5.03805	-1.84573	-3.0382	-2.09898	-5.78698	-7.01482
FGB	-5.40016	-1.06334	-4.76897	-3.22368	-5.71196	-1.93907	-1.15404	-0.655897	-5.80212	-3.37271	-2.40175	-3.72227	-3.05903	-4.61128	-6.50134	-1.31831	-0.833918	-5.30022	-5.69782	-6.27827	-1.83365	-2.83185	-5.97442	-3.62735	-1.18241	-5.15098	-4.54844	-5.40435	-1.33209	-1.23736	-1.07711	-0.447525	-2.55242	-5.60472	-5.681	-6.95608	-1.71925	-4.97475	-3.15148	-5.19662	-6.40767	-6.36516	-7.35319	-5.03805	-5.43069	-3.0382	-2.99206	-5.78698	-7.01482
FGFR1	-5.40016	-4.17882	1.08901	-8.13057	-5.71196	-2.98638	-2.24765	-1.26345	-5.80212	-3.37271	-1.81678	-1.70897	-1.9335	0.388725	-3.69399	-4.55451	-2.0826	1.19163	-0.449892	-2.95634	-0.940567	-1.12135	-0.974421	-3.62735	-2.81984	-0.0216983	-4.54844	-2.08243	-3.34045	-1.43292	-0.85094	-0.303311	-1.61655	-1.08116	-1.22157	-1.25564	-4.17868	-4.97475	-2.5438	-0.152223	-2.60032	-1.36516	1.35761	-1.83642	-3.84573	-3.53124	-1.51402	-1.61705	-1.52297
FGFR2	-0.815198	1.35516	4.52105	-1.73825	-5.71196	-1.60787	-1.7831	-0.229694	-1.71466	-5.37271	-2.40175	-0.282399	-0.870492	-4.61128	-4.91638	-1.08503	-1.78661	2.18359	0.410705	5.87179	-1.47108	-2.20382	-5.97442	-3.11278	-6.98977	1.17095	-1.089	-0.275071	-2.59679	-2.57976	-2.10383	-1.22197	-2.55242	-0.395271	-2.681	-4.95608	-2.47824	-0.804829	-7.5438	0.531303	-1.12227	-6.36516	-7.35319	-5.03805	-0.523803	-2.67141	-1.51402	-1.78698	-7.01482
FGFR3	-0.400161	-4.17882	0.72288	-1.33615	-5.71196	-7.89327	-1.7831	-1.70145	-5.80212	-5.37271	-1.24075	-5.6698	-0.870492	-4.61128	-6.50134	-3.12567	-3.78661	-3.30022	-5.69782	-6.27827	-2.31908	-2.20382	0.195504	-6.43471	-3.98977	-1.98106	-4.54844	-2.08243	0.172861	-2.57976	-1.34545	-1.85518	-3.16909	-5.60472	-5.681	-6.95608	-7.76364	-4.97475	-3.63691	-5.19662	-1.65279	-2.66472	-4.03127	-2.45309	-1.03838	-3.53124	-1.75502	-2.78698	-1.58856
FGFR4	3.11554	-0.515852	-4.76897	-0.0431041	-0.390029	-0.598648	-0.717446	-0.927927	-5.80212	0.649662	-0.949619	-1.06777	0.160011	-4.61128	-0.828919	-1.08503	1.82334	0.722144	0.0570677	-2.57783	-0.248689	0.126574	0.726019	-1.57673	-1.70437	-1.98106	0.910996	2.42219	-0.74435	-1.89526	-0.481159	-0.303311	-1.26863	-4.01976	-5.681	-6.95608	-0.85675	1.2347	1.64849	-1.49618	-2.32021	2.07779	-2.14374	-2.27252	-1.18277	1.01308	-0.941437	-0.657692	-7.01482
FHL3	-1.40016	0.759783	1.29712	0.0934347	1.8272	-0.45864	-4.23961	-1.26345	0.689733	0.931075	-0.71369	-0.499876	-1.9335	0.476187	1.16399	-2.42206	-2.0826	0.947704	1.44173	0.766124	-0.734116	0.232283	0.400619	0.372647	-1.98977	1.17095	0.910996	-0.194901	-1.01183	-1.23736	-2.71601	-0.983393	-0.600249	0.0677006	-0.0960422	-1.46422	-0.85675	1.87074	-0.775618	1.22965	0.752197	0.403027	-1.14374	-0.326556	0.523503	-1.76256	-0.0312342	0.871236	-0.588559
FILIP1L	-0.400161	-5.76378	-2.44704	-1.73825	-0.0681004	-0.598648	-1.43685	0.0988923	-3.48019	-0.980388	-2.40175	-1.46593	-1.30345	-0.611275	-2.10903	-1.96033	-0.833918	-3.30022	-1.89046	-0.347533	-3.05604	-1.73669	0.793763	-3.11278	-2.34591	-0.69155	-1.37851	-3.08243	-1.59679	-2.17766	-0.85094	-0.303311	-3.61655	-1.60472	-0.157443	-3.49664	-7.76364	-2.38979	-0.230919	-5.19662	0.115887	0.293055	-1.89376	-0.74527	-1.43069	-5.70116	-0.424379	1.38295	-0.385468
FLJ10357	-1.59281	-2.59385	-1.30954	-1.02204	-3.39003	-1.60787	-1.7831	-0.229694	-5.80212	-1.20278	-2.07982	-2.01772	0.160011	-1.28935	-2.69399	-1.96033	-1.33142	-0.393333	-3.11286	-0.0114833	-1.47108	-2.20382	-1.5821	-4.43471	-4.98977	-0.507125	-2.96347	-1.81939	-1.33209	-1.23736	-1.34545	-0.175272	-1.79058	-1.4348	-2.681	-2.95608	-2.47824	-0.274315	-0.843362	-0.874689	-1.23775	-1.04323	-0.375915	-1.80539	-1.84573	-2.15684	-0.424379	-2.46505	-0.865077
FLT4	-1.15223	-0.763779	-4.76897	-0.0431041	-5.71196	-1.60787	-0.241618	-1.70145	-1.4098	-1.56535	-1.59439	-1.24834	0.160011	-2.61128	-2.33142	-1.08503	-1.14835	-5.30022	-0.449892	-0.27827	-1.47108	-1.12135	-1.8045	-1.73427	-1.86049	-0.69155	-4.54844	-1.49746	-2.90874	-1.63222	-0.188868	-0.175272	-1.37554	-5.60472	-5.681	-3.78615	-2.47824	-4.97475	-0.566522	-0.874689	-4.08575	-1.78019	-2.06779	-1.52709	-5.43069	-1.33193	-1.30757	-1.69951	-3.6929
FLVCR2	-2.8152	-4.17882	-4.76897	-0.362383	-5.71196	-1.35411	-0.717446	0.0988923	-1.89523	-2.37271	-0.605887	-1.70897	-0.265123	-4.61128	-1.33142	-1.31831	0.066546	-3.71526	-3.11286	-1.95634	-0.734116	-2.20382	-3.65249	-2.11278	-3.08288	-5.15098	-2.96347	-1.31689	-0.83008	-1.08333	0.444726	0.579956	-2.82805	-5.60472	-4.681	-6.95608	-1.22448	-4.97475	-1.10086	0.125311	-5.40767	-4.78019	-2.22391	-2.77502	-5.43069	-0.182837	-0.941437	-2.78698	-3.6929
FNDC3B	2.1697	1.78312	1.87488	-0.193929	1.61896	0.256479	-0.384953	-0.655897	2.79034	2.69876	0.752509	-0.389693	-0.265123	4.12682	-0.234558	-1.08503	-0.833918	3.5295	2.18482	1.87148	-0.940567	0.496624	1.3202	2.33016	1.31401	2.41126	2.90278	3.1074	0.638423	1.59017	-1.67537	-0.303311	1.27275	1.52456	1.88124	0.938743	-0.563968	2.80661	-0.566522	2.11627	1.18478	0.814752	1.71827	2.64284	2.16922	-1.59962	2.09843	1.3729	1.20918
FOS	5.35389	0.0435757	4.71887	-0.362383	-1.12699	-0.331026	-1.15404	-0.927927	2.10477	2.011	-1.81678	-1.24834	-0.870492	3.59818	-0.372061	-2.42206	-0.985921	2.37926	2.70732	3.78378	-1.18157	0.41608	4.56377	0.293213	-0.119404	2.83201	2.61144	2.88105	-2.10851	2.51073	-1.07711	-0.303311	0.705378	2.10263	-0.823024	1.76502	-0.112588	-0.974754	5.89798	3.29122	3.96519	4.18847	4.09285	2.85677	3.91582	-0.428144	4.76521	3.69482	4.81886
FOSL1	1.0261	-1.06334	-4.76897	-1.73825	-2.12699	-0.598648	-1.7831	-2.33344	-1.10168	-0.728849	-4.32374	-2.89219	-0.265123	4.14027	-1.85749	-9.25495	-1.78661	-0.656368	-3.11286	-2.19081	-3.05604	-0.101454	-5.97442	-1.73427	-6.98977	-0.293	-1.54844	-0.194901	-2.34045	-0.92768	-0.481159	-0.783392	-2.55242	-3.2828	-5.681	-4.63415	-4.17868	2.00253	-0.929092	-5.19662	-4.08575	-3.5578	-2.82963	-3.19005	-1.10877	-2.37923	-1.75502	-1.61705	-5.01482
FOXA1	2.22189	-5.76378	3.94183	-2.29768	-5.71196	-1.12508	-0.920895	-1.70145	-5.80212	4.22907	-2.07982	-2.89219	-0.870492	4.69934	-1.85749	-1.96033	1.12801	-5.30022	0.0570677	2.10975	-3.05604	-1.73669	5.06861	-1.73427	2.19511	-5.15098	-0.963473	3.87873	-3.34045	-1.43292	-1.34545	-0.603644	-7.07598	1.0677	-0.551722	-6.95608	-7.76364	-4.97475	3.61544	2.44001	-1.70724	3.37462	-3.26573	-5.77502	-3.84573	-0.571879	-1.75502	4.61817	-2.7669
FOXC1	-0.815198	2.34475	4.55746	-0.193929	1.47787	-0.220843	-1.43685	-0.927927	1.5902	-3.37271	-1.81678	-0.187137	-1.9335	2.83167	-0.45695	-1.08503	-0.70189	2.05733	0.711571	0.979118	-1.47108	0.719948	-5.97442	0.372647	-6.98977	0.957543	-0.378511	-0.760498	-0.591793	0.921227	-1.34545	-0.783392	1.63826	1.6714	-0.471551	-1.40149	-4.17868	-0.020558	-1.10086	3.23384	1.29968	-3.78019	0.354164	-0.805391	1.5235	-2.37923	0.200582	-5.78698	-0.885541
FSTL3	-5.40016	-5.76378	-4.76897	-3.22368	-2.71196	-1.93907	-2.92411	-1.70145	-2.80212	-3.37271	-1.08786	-3.72227	-1.30345	1.55865	-3.17942	-1.96033	-2.98592	-5.30022	-5.69782	-5.27827	-3.05604	-1.73669	-5.97442	-3.62735	-6.98977	-5.15098	-4.54844	-0.0120367	-1.74435	-5.80215	-1.34545	-1.22197	-2.55242	-5.60472	-5.681	-6.95608	-2.47824	-1.06786	-2.33435	-1.49618	-6.40767	-6.36516	-7.35319	-2.90055	-2.43069	-5.70116	-1.51402	-5.78698	-3.42986
FZD1	-5.40016	1.15508	2.3909	-1.73825	-0.0115169	-0.753717	-0.920895	-0.0560662	-0.847924	1.15086	-2.07982	-0.389693	-0.0381064	-4.61128	-0.828919	-1.31831	-1.14835	0.314486	1.6685	2.06158	-1.18157	-0.691366	-1.45086	-1.43471	-2.34591	3.6628	-1.089	0.239502	-2.10851	-1.08333	-0.481159	-0.303311	-0.988519	1.02463	0.694035	-1.86861	-1.71925	-1.1674	-2.33435	-0.152223	-0.525032	-0.972839	-0.265732	-1.02013	0.613701	-5.70116	-0.214456	-0.36071	-1.23346
FZR1	2.20717	1.00441	3.06392	0.332957	1.01596	-0.753717	0.21836	0.0988923	1.82724	0.0196118	-0.0209245	-0.282399	0.332393	2.74628	0.240123	-0.700362	0.138774	-0.442243	1.80203	0.979118	0.113881	1.95427	1.46852	0.794111	-0.741841	2.91511	2.53903	2.07946	-0.33209	0.361081	0.751828	0.424925	0.407834	1.18969	1.08718	-0.401486	-0.85675	0.907889	0.646023	-0.152223	0.177288	0.700932	-0.598307	0.163583	0.926858	-0.498222	0.0460716	0.913465	0.223581
G6PD	2.84777	2.03064	0.72288	1.79276	0.9319	1.41051	-0.541642	0.238809	1.81259	2.32773	0.169796	-0.625407	0.626922	2.34292	2.20601	0.871753	0.207558	2.25436	1.85677	1.34378	0.488277	0.975508	1.31098	3.04709	2.36338	1.49287	1.9273	3.85539	0.785951	0.716176	-0.062295	-0.983393	1.58223	1.02463	0.201638	-0.464222	-0.112588	2.3828	0.237558	1.99321	0.306571	2.76155	-2.4463	-0.65954	1.15427	0.58424	-0.307565	2.19602	-0.194645
GABBR2	-5.40016	-5.76378	-4.76897	-3.22368	-5.71196	-2.36971	-0.717446	-3.48451	-5.80212	-5.37271	-2.81678	-2.89219	-1.9335	-4.61128	-2.69399	-2.42206	-1.54114	-2.30022	-5.69782	-6.27827	-1.47108	-1.73669	-5.97442	-6.43471	-4.98977	-5.15098	-4.54844	-5.40435	-1.74435	-2.17766	-0.85094	-0.783392	-3.61655	-5.60472	-5.681	-6.95608	-4.17868	-4.97475	-2.33435	-2.38926	-6.40767	-3.36516	-5.76823	-7.35998	-5.43069	-2.15684	-1.75502	-5.78698	-7.01482
GABRP	3.70836	4.14761	-4.76897	-1.73825	3.19794	-0.331026	-0.241618	-0.229694	3.3753	-5.37271	-0.16653	1.49869	0.487962	-4.61128	1.33786	-1.08503	-0.70189	0.314486	3.41592	-0.523382	0.216975	1.28992	-5.97442	0.372647	-2.34591	3.02394	5.1169	-5.40435	-0.591793	-0.101709	-1.07711	-0.447525	-1.16909	1.65266	3.51375	1.99229	0.628677	6.16863	-1.52143	-5.19662	3.44251	-4.04323	1.56268	3.24828	2.73421	-1.33193	-0.649671	-5.78698	1.36455
GADD45B	1.1848	2.92272	1.01239	4.06265	1.81942	1.70478	0.21836	-1.70145	3.98741	3.04936	0.975223	-0.00955055	-0.537916	3.90048	0.908047	-0.879912	0.716572	1.87969	2.23292	2.28397	0.488277	3.07176	2.22034	2.46917	1.2294	2.60391	0.358455	2.1348	0.669993	1.95274	-1.07711	-0.175272	2.82639	0.770315	1.51867	0.461777	0.507823	1.93214	4.32116	2.57817	1.90974	2.59774	1.22801	2.06209	2.97019	0.741781	2.32729	2.52591	1.52045
GAL	-5.40016	-5.76378	-4.76897	-3.22368	-1.71196	-4.08591	-0.113081	-2.33344	-2.21716	-5.37271	-1.59439	-2.89219	-0.870492	-4.61128	-3.69399	-4.55451	-2.47402	-5.30022	-5.69782	-6.27827	-1.83365	-1.40864	-5.97442	-3.11278	-3.98977	-5.15098	0.910996	-5.40435	-1.74435	-2.17766	-0.481159	-1.50027	-3.61655	-2.79737	-5.681	-6.95608	-1.71925	-0.804829	-7.5438	-0.44173	-6.40767	-6.36516	-7.35319	-7.35998	-0.523803	-1.94627	-2.47749	-2.61705	-7.01482
GAMT	-1.15223	-4.17882	-4.76897	-0.362383	-3.71196	-0.220843	0.00662595	0.0988923	-3.48019	-0.980388	-0.949619	-0.187137	0.332393	-4.61128	-2.69399	-1.08503	-0.269134	-2.49287	-3.11286	-0.754708	-0.553544	-0.691366	1.55696	-2.73427	-4.98977	-0.343626	-2.22651	-0.649467	-0.668686	-1.08333	0.444726	-0.447525	-1.07598	-5.60472	-4.09604	-4.95608	-1.71925	0.195171	0.237558	-5.19662	-3.40767	-4.36516	-0.978155	-4.55262	-1.34323	-2.15684	-0.424379	-3.20201	-2.31438
GAPDH	6.53685	6.8507	7.5611	2.35022	7.22817	4.86787	-0.241618	0.48472	6.31325	6.7332	1.41559	3.26094	0.332393	8.79147	6.51372	0.246886	1.659	7.21054	6.9889	4.96847	2.47793	5.27168	5.83454	4.11026	4.51455	7.46901	8.89697	6.46601	1.89239	4.30376	-0.062295	0.785923	5.1984	7.77587	6.87238	5.49101	5.37831	7.03927	3.18837	7.46092	4.90521	4.99074	5.45657	4.70207	6.14626	1.59346	5.11272	7.288	3.84004
GATA2	-5.40016	-1.85689	-4.76897	-2.29768	-5.71196	-0.598648	-1.43685	-0.927927	-5.80212	0.0196118	-2.40175	-3.72227	-3.05903	-0.803921	-2.69399	-1.96033	-0.833918	-5.30022	-5.69782	-5.27827	-1.47108	-1.40864	-0.804496	-6.43471	-4.98977	-5.15098	-4.54844	0.881048	-1.33209	-3.06518	-0.653	-0.447525	-5.49102	-5.60472	-5.681	-6.95608	-4.17868	-4.97475	-1.52143	0.125311	-6.40767	-6.36516	-7.35319	-7.35998	-5.43069	-1.76256	-6.79942	-1.26341	-7.01482
GATA3	-5.40016	-5.76378	-4.76897	-0.362383	-5.71196	0.0840116	-1.15404	-1.26345	-5.80212	-5.37271	-1.59439	-2.01772	-0.537916	-4.61128	-2.33142	-2.42206	-1.14835	-5.30022	-1.89046	-6.27827	-1.47108	-1.40864	0.451844	-2.43471	-4.98977	-2.56602	-4.54844	0.150235	-1.92123	-3.06518	-0.85094	-0.783392	-2.82805	-5.60472	-5.681	-4.95608	-4.17868	-4.97475	-1.95884	-5.19662	-3.60032	-3.5578	-3.26573	-5.03805	-5.43069	-3.53124	-0.649671	0.342308	-2.8449
GBP1	0.45782	-0.304348	5.03999	-1.02204	4.19944	-1.12508	-0.717446	-1.70145	3.3877	0.984846	-1.24075	-1.46593	0.332393	3.64611	-0.109027	-0.700362	-1.33142	2.31449	0.568967	1.69327	-1.83365	-1.40864	0.793763	2.46011	1.64686	2.68822	1.45156	1.21036	-0.453835	-1.63222	-2.10383	-0.175272	1.55337	2.29009	3.6044	2.73567	0.740186	2.34717	0.410394	3.57817	2.37368	0.249553	0.601001	2.62444	3.0081	0.48206	1.70441	2.67655	3.37212
GDF15	1.75971	-1.44185	-4.76897	-1.02204	-5.71196	-1.93907	-1.43685	-0.427114	-5.80212	1.44747	-1.08786	-1.46593	-0.870492	-0.151844	-2.33142	-1.08503	-0.70189	-5.30022	-5.69782	-0.693307	-1.47108	-2.20382	-0.548156	-4.43471	-6.98977	-3.56602	-1.96347	0.502536	-1.45384	-1.63222	-1.07711	-1.85518	-2.55242	-5.60472	-5.681	-6.95608	-4.17868	-4.97475	0.237558	-0.152223	-6.40767	-0.972839	-3.26573	-3.77502	-2.62334	-1.94627	-0.532632	-5.78698	-7.01482
GEMIN4	-0.00784314	-0.763779	2.47895	-0.362383	-0.0395313	-0.927484	-1.43685	-1.26345	-1.55419	-0.728849	-1.81678	-2.38969	0.160011	-3.61128	-0.109027	-1.08503	-0.985921	-0.25583	-0.449892	-1.57783	-0.940567	-0.372416	-1.51499	-1.73427	-2.59745	0.0969462	1.06627	-1.08243	-1.92123	-1.23736	-1.67537	-0.603644	-0.754054	-0.960869	0.100355	-1.78615	-2.47824	0.347174	-1.18625	0.710273	-2.01536	-1.90573	-1.82963	-1.42924	0.613701	-1.76256	-0.214456	-0.786975	-0.805371
GLUD1	4.34803	3.59157	3.65309	1.71178	2.84263	1.48177	-1.7831	-0.0560662	3.33487	4.0045	1.07399	1.78963	-1.9335	4.65785	0.240123	-0.269109	1.86652	3.42088	2.92789	2.6701	0.403388	2.34172	3.23747	2.57931	2.41537	2.83201	4.49322	3.99011	1.03903	1.87498	-0.481159	1.02062	1.83691	1.7616	0.962852	1.47855	1.19926	3.73949	2.98758	2.89085	2.32025	1.88751	0.982195	2.21367	3.79331	0.58424	3.24361	4.06633	2.32725
GLUD2	-1.94073	0.445674	-1.18401	0.538318	-5.71196	0.0840116	0.712513	1.18387	-0.592667	0.856113	-0.0209245	0.479946	1.2629	-2.02631	-0.547148	0.410385	0.763017	-0.170941	-3.11286	-3.47091	0.00284971	0.232283	-5.97442	-0.942855	-1.28933	-5.15098	-1.54844	1.00504	0.608321	0.182744	0.819154	1.39842	0.113843	-1.4348	-5.681	-2.00188	-1.71925	-4.97475	-1.63691	-1.49618	-3.08575	-2.27769	-1.73849	-2.11205	-5.43069	-0.571879	0.457969	-2.78698	-2.92736
GLUL	3.29681	2.83613	7.20257	0.332957	4.74952	1.04337	-0.241618	-1.70145	4.75726	5.01746	0.28631	-1.06777	-0.0381064	3.84405	1.26684	-1.96033	1.32797	3.7469	3.87204	4.38262	0.568447	2.0125	4.83132	2.81085	4.01164	4.55983	5.91407	5.0905	-0.83008	2.47087	-0.327624	0.251206	1.81276	5.16759	4.80684	4.22259	2.33044	4.70999	5.30541	5.85663	4.15743	3.80352	4.25182	3.61228	5.37424	0.827617	4.41793	5.60319	4.87582
GLYATL1	-5.40016	-4.17882	-4.76897	-2.29768	-5.71196	-1.93907	-1.43685	-1.70145	-5.80212	-5.37271	-2.07982	-3.72227	-0.870492	-4.61128	-1.64336	-1.08503	-1.33142	-5.30022	-5.69782	-4.69331	-1.18157	-2.83185	-5.97442	-6.43471	-6.98977	-5.15098	-4.54844	-2.597	-2.10851	-1.23736	-2.10383	-0.603644	-4.26863	-5.60472	-5.681	-6.95608	-2.47824	-4.97475	-1.78891	-5.19662	-6.40767	-6.36516	-7.35319	-5.77502	-5.43069	-3.53124	-0.941437	-5.78698	-7.01482
GNA14	-1.59281	-1.85689	-4.76897	-1.33615	-5.71196	-2.98638	-0.541642	-0.655897	-5.80212	0.0196118	-1.59439	-3.72227	1.08039	-4.61128	-1.85749	-1.96033	-1.78661	-4.30022	-5.69782	0.463197	-4.64101	-1.73669	-5.97442	-3.62735	-1.98977	-5.15098	-4.54844	-1.31689	-2.10851	-3.92768	-0.481159	-0.303311	-3.16909	-5.60472	-5.681	-6.95608	-1.71925	-4.97475	-1.00464	-5.19662	-6.40767	-2.78019	-1.68077	-4.19005	-5.43069	-0.498222	-2.47749	-2.78698	-2.49126
GNE	-0.815198	-4.17882	1.06392	-0.193929	-1.62449	-0.753717	-0.717446	0.238809	-1.4098	-0.124778	-0.71369	-1.46593	-1.9335	-1.61128	-1.45695	-1.6039	-0.833918	-0.599784	-1.23839	2.20555	-0.940567	-1.40864	-0.582103	-1.73427	-1.86049	0.603906	0.0954203	-3.08243	-1.33209	-0.456374	-1.67537	0.157033	-0.988519	-0.0501359	0.74526	-1.52981	-1.71925	-1.65283	-2.5438	-0.152223	-0.500784	1.16622	-0.341968	-1.96766	-1.43069	-1.46595	-0.532632	-0.832779	-0.786005
GNG4	-5.40016	-4.17882	-4.76897	-1.02204	-5.71196	-0.927484	-0.241618	-0.427114	-5.80212	-5.37271	-1.08786	-0.756057	0.487962	-4.61128	-0.946755	-0.879912	-0.174755	-5.30022	-1.23839	-6.27827	-1.47108	-0.898962	-5.97442	-3.62735	-2.18241	-5.15098	-3.54844	-2.597	-1.21213	-2.17766	0.356831	0.505478	-1.49102	-4.60472	-5.681	-6.95608	-2.47824	-4.97475	-1.78891	-5.19662	-6.40767	-4.04323	-2.82963	-3.55262	-2.26077	-0.90242	-1.30757	-5.78698	-4.6929
GNL3	2.10763	2.79081	2.24225	2.23685	2.82332	0.894634	0.712513	0.593001	1.77531	1.78717	0.583147	0.594306	-0.537916	1.91229	1.84295	0.246886	0.668582	2.22334	1.44173	1.15636	0.644396	0.918174	2.26398	1.69972	0.624941	2.86583	3.5496	2.23227	1.01628	1.16748	0.444726	0.719932	2.01942	2.24077	2.23786	0.401477	-0.563968	3.25406	1.34494	2.89085	0.487143	1.81475	1.21666	0.453802	3.29041	-0.241731	0.457969	2.30049	0.962456
GPR160	4.05517	-2.59385	4.35515	-2.29768	-1.9046	-0.927484	0.21836	0.238809	-1.71466	2.47904	-1.59439	-1.70897	-0.870492	4.09953	-2.33142	-1.96033	1.55725	-1.0523	-5.69782	2.52586	-0.734116	-0.372416	2.92946	-1.73427	0.19014	-0.396094	0.495958	1.1348	-1.59679	-0.802149	-0.653	0.505478	-1.37554	-1.08116	-0.87365	-1.86861	-2.47824	0.417563	-0.277015	-1.49618	-2.15975	0.234756	-1.57184	-0.57862	-0.343231	-1.00072	-0.424379	2.4562	0.298059
GPR3	-3.8152	-1.85689	-4.76897	-1.02204	-5.71196	-1.93907	-1.43685	-0.427114	-5.80212	-2.37271	-1.4118	-3.72227	-3.05903	-4.61128	-6.50134	-4.55451	-1.54114	-5.30022	-5.69782	-6.27827	-1.83365	-1.12135	-5.97442	-4.43471	-3.53034	-3.15098	-4.54844	-5.40435	-2.90874	-2.57976	-1.34545	-0.175272	-2.82805	-3.60472	-5.681	-6.95608	-2.47824	-4.97475	-7.5438	-5.19662	-6.40767	-6.36516	-7.35319	-7.35998	-5.43069	-2.67141	-6.79942	-5.78698	-7.01482
GRB10	0.300279	2.24745	2.77019	-0.773015	-0.188395	0.477419	0.712513	0.238809	1.70567	0.984846	0.169796	0.148553	-0.265123	-4.61128	1.49301	-0.544145	-0.70189	2.56396	2.492	0.710415	-1.18157	0.975508	-0.301996	0.598715	-1.70437	0.978302	3.95141	2.70939	0.1281	0.624116	-0.327624	-0.0548553	1.25493	1.47209	1.13917	1.27754	1.27528	1.41756	0.89499	4.08878	0.192238	0.321344	-0.297912	-0.74527	0.77876	-2.67141	0.77801	-0.657692	0.184848
GRB7	0.45782	-0.763779	0.36031	-2.29768	-0.75776	-2.98638	-1.7831	-0.655897	1.28534	0.327734	-8.57167	-2.38969	0.160011	2.03258	-6.50134	-4.55451	-1.33142	-5.30022	0.0570677	0.664245	-1.47108	-1.12135	3.78879	-1.26478	1.07632	-0.0216983	0.975126	-1.49746	-1.59679	-1.08333	-1.34545	-0.783392	-2.82805	-1.60472	-2.09604	-6.95608	-2.47824	-2.38979	-0.230919	-5.19662	-2.50078	2.55072	-0.022278	0.305357	0.476197	-3.0382	-0.799418	-0.786975	-1.8449
GSTM1	-5.40016	-2.59385	-4.76897	0.0934347	-5.71196	-1.12508	-0.920895	0.0988923	-3.48019	-1.56535	-0.605887	-1.46593	0.160011	-4.61128	-2.33142	-0.879912	-0.00948993	-5.30022	-5.69782	-1.47091	-1.47108	-1.12135	-5.97442	-4.43471	-2.18241	-3.15098	-4.54844	-3.08243	-0.523544	-0.566933	-0.062295	0.785923	-1.9467	-5.60472	-5.681	-5.95608	-4.17868	-4.97475	-0.843362	0.125311	-2.82271	-0.810568	-3.10527	-4.19005	1.9787	-2.67141	-1.09898	-1.39466	-1.3424
GTPBP4	1.72912	1.6371	3.96235	0.948918	2.27104	-0.111909	-1.7831	-0.927927	1.10477	1.25665	-0.605887	-0.625407	-0.265123	0.295615	0.998502	-3.12567	-0.833918	1.76587	2.86823	2.67593	0.00284971	0.496624	1.54128	1.07309	-0.563504	3.32069	3.08819	1.41582	-0.83008	0.420243	-0.85094	-1.50027	1.05844	2.92275	1.72839	0.356808	-0.112588	3.18512	0.0855546	3.44363	1.37368	0.0442341	-0.446304	0.0662853	2.57493	-1.33193	0.962133	0.981209	1.28438
GUSB	0.749587	0.850931	2.36031	-1.02204	-0.0395313	-1.12508	-0.717446	-1.26345	0.9258	2.15086	-1.08786	-1.24834	-1.9335	1.08916	0.240123	-0.700362	-0.174755	1.64229	1.85677	0.777013	-1.47108	-0.101454	-0.273981	1.26573	-0.741841	2.73776	0.40576	0.377006	-1.10851	-0.268171	-0.481159	-1.50027	-0.157119	0.90307	0.794729	-0.689289	-0.563968	0.907889	0.338841	1.12531	0.221682	-0.557802	-1.06779	-1.68755	1.09287	-1.59962	0.77801	0.0459149	-0.522971
H2BFS	4.50823	4.73208	7.75017	3.06357	5.30763	1.97401	-1.15404	-0.427114	4.14916	4.05565	0.338222	0.844772	0.753666	5.41939	3.14791	0.0624615	1.01575	5.61789	4.93245	4.42736	0.113881	2.8824	5.84576	3.64077	2.30944	6.68783	6.29862	4.1636	-0.215971	2.21094	-0.481159	2.32127	3.72168	5.61444	5.73368	3.30719	1.3475	5.6718	3.56603	5.22124	4.16123	4.34479	2.20523	3.11879	6.06766	1.68829	2.73974	4.60104	3.56732
HDGFRP3	-5.40016	1.41613	-4.76897	-1.33615	-5.71196	-1.60787	-0.920895	-0.427114	-4.21716	-3.37271	-1.59439	-1.70897	-1.30345	2.08916	-1.85749	-2.42206	-0.985921	-4.30022	-5.69782	-2.95634	-0.248689	-0.691366	-1.11644	-3.62735	-3.98977	-2.15098	0.773492	-5.40435	-3.34045	-1.63222	-1.34545	-1.22197	-3.16909	-0.517262	-5.681	-0.746622	-0.85675	-4.97475	-2.5438	-1.49618	-6.40767	-2.36516	-2.82963	-3.90055	-5.43069	-2.37923	-1.75502	-0.429423	-6.01482
HGD	0.154428	-5.76378	-4.76897	-0.773015	-5.71196	-1.60787	-1.7831	-0.927927	-5.80212	-5.37271	-1.81678	-1.24834	-1.9335	-4.61128	-3.17942	-1.96033	-1.54114	-5.30022	-5.69782	-6.27827	-2.31908	-4.12135	-5.97442	-6.43471	-1.49792	-5.15098	-4.54844	-2.08243	-2.90874	-1.89526	-2.71601	-3.01046	-2.82805	-5.60472	-5.681	-6.95608	-1.71925	-4.97475	-2.84336	-5.19662	-6.40767	-2.5578	-4.03127	-7.35998	-5.43069	-3.53124	-6.79942	-5.78698	-7.01482
HIST1H1A	-5.40016	1.47463	4.48369	-1.02204	0.857899	-0.927484	-0.920895	-1.70145	-0.0472327	-0.980388	-2.07982	-2.01772	-3.05903	-2.61128	-0.0419125	-0.879912	-0.580938	3.67132	0.841339	2.07488	-0.553544	0.579086	-5.97442	0.531077	-0.945375	4.59553	-4.54844	-5.40435	-2.59679	-0.92768	-0.481159	-0.175272	1.34608	1.52456	2.46365	0.301313	-1.71925	1.53304	-1.63691	2.06077	0.333792	0.442198	-5.03127	-2.90055	2.73421	-1.0963	0.329865	-0.539048	-7.01482
HIST1H2AC	2.6873	2.98441	4.69863	1.37921	2.83108	0.894634	-0.920895	-9.75129	1.76012	1.97602	0.391225	1.20759	-0.0381064	3.78533	1.97033	-3.12567	-0.0897573	3.22334	3.35203	2.47662	-0.393079	2.0125	2.51342	1.69972	0.811131	2.92048	4.15547	2.303	-0.523544	1.23127	-0.653	-1.85518	2.44758	3.14011	2.02635	1.55172	1.19926	2.95006	2.19767	2.44001	1.70085	2.48347	0.65243	1.00634	3.56931	0.0267582	2.05856	1.98121	1.48502
HIST1H2BE	2.35473	2.28061	5.37823	0.0934347	1.17069	-0.220843	-0.384953	0.0988923	0.10477	-0.124778	-1.59439	-1.70897	-0.870492	4.22477	1.19214	-2.42206	-0.580938	3.01266	2.98517	2.39062	-0.734116	-0.22519	1.059	-0.734268	-0.156879	4.33082	0.258919	2.85774	-1.59679	0.112734	-1.67537	0.251206	1.68224	2.38963	3.35242	1.55172	-1.22448	-0.020558	-0.775618	3.1208	1.28581	2.21227	-0.48283	0.834777	-1.03838	-0.367261	0.77801	0.871236	1.82438
HIST1H2BF	2.1697	1.08171	5.73485	-0.193929	2.97104	-0.111909	-0.241618	-0.229694	0.870305	0.984846	-0.328497	-2.01772	-0.265123	3.44401	0.46444	-0.700362	0.138774	3.46796	1.5968	1.87148	0.488277	0.853379	2.89286	-0.28496	-0.156879	3.60056	3.70895	1.9532	-1.01183	-0.268171	-0.062295	0.34175	0.781999	3.20585	2.30199	-0.326718	-2.47824	2.5171	0.0855546	3.14768	1.69561	1.84916	-1.10527	1.4538	3.7616	-0.90242	1.00148	2.23539	1.59989
HLX	-1.59281	-5.76378	-4.76897	-0.773015	-3.71196	-1.35411	-0.241618	0.366349	-0.409803	-0.728849	-0.830204	-1.24834	0.332393	-0.611275	-2.33142	-0.269109	0.511856	-1.71526	-1.23839	-0.395627	0.00284971	-0.372416	-1.5821	-2.11278	-2.81984	-1.34363	-4.54844	0.150235	-0.74435	-1.23736	-0.062295	-0.175272	-1.26863	-2.79737	-2.22157	-2.31222	-2.47824	-4.97475	-1.78891	-5.19662	-6.40767	-3.36516	-0.134026	-2.77502	-5.43069	-4.19866	-2.47749	-1.53905	-1.58856
HMGA2	0.50673	-2.59385	-4.76897	-1.02204	-5.71196	-1.60787	-0.541642	0.238809	-5.80212	-1.91327	-1.81678	-2.38969	-0.265123	3.53847	-1.45695	-0.879912	-0.0897573	-4.30022	-5.69782	-6.27827	-1.18157	-0.691366	-5.97442	-2.43471	-3.98977	-5.15098	-4.54844	-5.40435	-1.33209	-2.57976	-1.07711	-0.783392	-1.07598	-5.60472	-5.681	-4.14872	-1.71925	-4.97475	-1.78891	-5.19662	-6.40767	-3.78019	-4.03127	-3.19005	-5.43069	-1.59962	-6.79942	-5.78698	-7.01482
HMOX1	3.70836	3.09731	2.3909	1.27031	2.02275	0.732441	0.845963	-0.655897	2.14039	1.71476	0.628001	-1.46593	-0.0381064	2.51801	0.77478	1.34682	0.207558	1.61864	1.80203	3.2744	-0.393079	0.232283	1.51743	1.86907	0.898974	1.46373	1.3823	2.49651	-0.33209	2.48479	-0.85094	0.0536692	1.18141	1.99519	4.07221	1.43194	0.507823	1.41756	-0.230919	3.64259	0.731877	1.01855	0.889979	0.814946	1.70886	-1.94627	2.60997	1.96122	1.76654
HNMT	0.622207	-5.76378	-0.68151	-2.29768	-1.71196	-1.60787	-0.920895	-3.48451	-0.672837	-0.418509	-1.08786	-2.38969	-1.9335	-0.44135	-3.69399	-1.6039	-2.0826	-2.71526	-1.23839	-1.14899	-1.83365	-0.898962	-1.51499	-2.43471	-2.34591	-0.244091	-4.54844	-2.597	-2.34045	-2.57976	-0.85094	-0.783392	-1.79058	-2.14529	-0.288687	-2.78615	-4.17868	-2.38979	-1.00464	-0.152223	-1.60032	-2.04323	-3.54584	-2.65954	-1.18277	-1.94627	-1.09898	-1.26341	-0.491262
HNRNPA3	1.2292	1.15508	1.93147	-0.553138	0.417326	-0.753717	-0.541642	-0.427114	-5.80212	-0.565351	-0.16653	-2.38969	-0.265123	1.47619	-1.45695	-0.879912	-0.580938	-1.39333	-1.89046	0.541909	-0.940567	0.021604	1.22525	-1.91115	-1.37506	0.936481	1.87783	-0.649467	-1.33209	-0.802149	-1.67537	0.424925	-1.26863	0.82154	1.07388	0.272744	-0.85675	1.3828	0.533014	0.869472	-0.320212	-0.00760488	-0.319772	-0.394195	1.22752	-1.0963	-0.532632	0.622416	0.316093
HORMAD1	-5.40016	-0.515852	2.73087	-3.22368	1.78789	-7.89327	-2.24765	-3.48451	-2.80212	-5.37271	-1.81678	-2.38969	-1.9335	-4.61128	-1.85749	-1.31831	-2.47402	-1.71526	-0.449892	-1.81884	-2.31908	-4.12135	-5.97442	-4.43471	-6.98977	-1.06352	-4.54844	-5.40435	-2.59679	-2.17766	-1.07711	-0.983393	-3.16909	-0.960869	-0.681005	-6.95608	-4.17868	-3.38979	-4.22187	-5.19662	-0.122273	-6.36516	-5.76823	-1.21023	-5.43069	-2.15684	-1.51402	-5.78698	-1.23346
HOXD4	-5.40016	-1.85689	-4.76897	-1.02204	-5.71196	-1.93907	-0.541642	-1.26345	-1.55419	-1.20278	-0.71369	-0.899727	0.160011	-4.61128	-1.33142	-2.42206	-1.14835	-5.30022	-0.449892	-2.37138	-1.18157	-1.73669	-2.27398	-2.11278	-3.08288	-5.15098	-4.54844	-1.81939	-1.74435	-2.17766	-1.34545	-0.783392	-5.49102	-5.60472	-5.681	-2.43251	-0.563968	-4.97475	0.00309248	-0.44173	-1.65279	-1.78019	-2.22391	-2.65954	-5.43069	-1.0963	-0.307565	-3.46505	-3.31438
HPCAL1	1.88524	-0.515852	3.12585	-0.553138	0.609971	-0.111909	-0.717446	-2.33344	-0.129695	2.39548	-0.71369	-2.38969	-3.05903	2.76376	-0.643363	-1.08503	-0.985921	-0.212761	1.97461	-0.347533	-1.83365	0.126574	1.12361	0.0571455	-0.497916	1.11581	3.44592	2.83405	-2.10851	-2.57976	-1.07711	-0.447525	-0.361736	1.18969	0.676547	-1.20119	-2.47824	1.13377	-0.134411	1.93267	0.373685	0.110577	-1.68077	0.67894	0.978697	-2.67141	1.11944	1.15554	0.0937003
HRH1	-0.54218	-5.76378	-4.76897	-1.02204	-2.39003	-0.220843	-2.24765	-0.655897	-1.55419	-1.91327	-2.07982	-2.01772	-0.0381064	1.71065	-2.33142	-1.31831	-0.833918	-5.30022	-1.89046	-1.81884	-0.734116	-1.73669	-5.97442	-1.91115	-1.86049	-5.15098	-4.54844	-0.0120367	-1.59679	-3.06518	-1.07711	0.251206	-1.16909	-1.2828	-2.681	-2.78615	-0.320697	-2.38979	-1.18625	1.22965	-2.40767	-3.5578	-2.06779	-1.90055	-5.43069	-1.33193	-0.532632	-2.61705	-2.31438
HSPA4L	-5.40016	-2.59385	-4.76897	-0.553138	-0.0972468	-1.12508	-0.717446	-0.655897	-5.80212	-1.56535	-2.40175	-2.89219	-1.30345	-0.151844	-4.91638	-2.42206	-2.0826	-2.71526	-5.69782	-6.27827	-3.05604	-1.40864	-5.97442	-3.11278	-6.98977	-1.69155	-1.96347	-5.40435	-2.10851	-1.43292	-2.10383	-0.783392	-5.49102	-0.79737	-5.681	-6.95608	-7.76364	-1.1674	-2.11754	-0.874689	-6.40767	-6.36516	-5.76823	-5.77502	-1.5238	-2.37923	-0.941437	-5.78698	-6.01482
ID1	2.53058	-1.44185	0.137918	-0.193929	-0.853976	-0.598648	-0.717446	0.0988923	-4.21716	-0.243423	-0.505582	-1.06777	0.160011	4.57608	-2.69399	-0.879912	0.066546	0.057328	-0.449892	-0.66356	-0.393079	-1.12135	0.365429	-1.43471	-2.81984	1.75591	0.539027	2.87177	-1.74435	-0.566933	-1.67537	0.0536692	-0.906057	1.45056	-1.51108	-1.02534	-1.71925	-0.974754	1.20439	2.34254	-1.88411	-0.21541	-0.652755	-2.19005	-0.675806	-1.00072	-0.649671	0.498427	-1.18193
IER3	3.54235	1.2915	-0.309541	-1.73825	-0.542032	-0.45864	-2.92411	-0.427114	-1.21716	2.03669	-0.605887	-1.70897	-1.30345	3.65551	-1.04191	-1.6039	-0.0897573	1.22334	0.841339	1.84067	-0.940567	-2.83185	1.67663	0.642108	0.350081	2.76191	-0.156118	3.65634	-2.10851	1.2016	-1.67537	0.579956	-0.906057	0.680677	0.640923	-0.826792	-1.71925	1.40029	-0.0843704	0.869472	-0.652787	1.98799	3.80731	1.14385	0.798125	-1.76256	0.914827	1.17881	-0.748038
IGFBP4	3.34131	0.190417	3.28631	-0.362383	2.46297	0.40594	-0.920895	-0.655897	3.11972	3.61882	-0.4118	-0.282399	-1.30345	4.40832	0.417519	-1.08503	0.275999	3.34723	2.32455	2.9649	-1.18157	0.323431	4.06861	2.04911	1.07632	3.43773	3.45156	2.39006	-1.10851	3.23311	-1.67537	-0.783392	-0.0536141	3.52713	2.39046	2.04392	0.375911	2.24441	3.18412	3.78352	3.56961	3.00988	2.10008	3.24179	4.02463	1.49031	3.3516	3.86408	3.40829
IGFBP5	0.577119	2.7676	3.77019	-0.773015	1.05623	2.30026	-2.24765	-0.427114	2.9923	3.09082	0.338222	0.417662	-0.537916	3.51801	-0.234558	0.15656	-0.833918	4.10492	4.13349	3.31605	-0.117445	1.95427	3.48091	1.73522	2.13435	1.47838	2.86942	1.57293	-0.914969	2.40405	-0.481159	-0.603644	2.13347	3.41764	2.13278	1.65495	2.52983	0.907889	4.68592	5.97768	2.32025	3.13469	-0.153523	3.90094	1.96162	-0.182837	5.05934	7.11314	1.7131
IL11	-5.40016	-4.17882	-4.76897	-1.73825	-5.71196	-0.927484	-0.717446	0.238809	-1.71466	-3.37271	-0.949619	-2.89219	-0.537916	-0.289347	-3.69399	-1.96033	-1.33142	-5.30022	-5.69782	-6.27827	-0.940567	-2.83185	-5.97442	-3.62735	-3.53034	-5.15098	-1.37851	-4.40435	-1.92123	-1.43292	-0.062295	-0.447525	-1.79058	-5.60472	-5.681	-6.95608	-4.17868	-4.97475	-2.11754	-5.19662	-6.40767	-6.36516	-5.03127	-3.77502	-5.43069	-1.94627	-2.99206	-5.78698	-7.01482
IL5	-5.40016	-1.85689	-4.76897	-8.13057	-5.71196	-1.60787	-2.92411	-0.229694	-5.80212	-5.37271	-2.40175	-2.01772	-0.265123	-4.61128	-3.69399	-3.12567	-2.47402	-5.30022	-5.69782	-6.27827	-3.05604	-1.73669	-5.97442	-6.43471	-6.98977	-5.15098	-4.54844	-5.40435	-2.59679	-1.89526	-0.653	-0.175272	-3.16909	-5.60472	-5.681	-6.95608	-7.76364	-4.97475	-2.33435	-5.19662	-6.40767	-6.36516	-7.35319	-7.35998	-5.43069	-3.53124	-2.09898	-5.78698	-7.01482
IL6	-5.40016	-4.17882	-4.76897	-6.5456	-5.71196	-1.93907	-2.92411	-1.26345	-5.80212	-5.37271	-1.4118	-2.89219	-0.537916	-2.61128	-4.91638	-1.6039	-1.78661	-5.30022	-5.69782	-3.47091	-3.05604	-4.12135	-5.97442	-4.43471	-3.08288	-2.15098	-4.54844	-5.40435	-3.90874	-3.92768	-1.67537	-1.22197	-4.26863	-5.60472	-5.681	-6.95608	-2.47824	-4.97475	-3.63691	-2.38926	-6.40767	-6.36516	-7.35319	-7.35998	-5.43069	-5.70116	-6.79942	-3.78698	-7.01482
IL8	-2.8152	0.445674	-4.76897	-1.33615	-1.12699	-0.45864	-1.43685	-0.427114	-3.48019	1.82697	-0.16653	-1.70897	-1.9335	3.98491	-3.69399	-0.879912	-2.98592	-4.30022	-5.69782	-1.10834	-1.47108	-1.73669	-1.5821	-2.11278	-2.59745	2.51435	1.25892	2.69893	-2.10851	-3.92768	-1.67537	-0.983393	-1.26863	-2.79737	1.4989	0.365853	-1.71925	4.63811	-1.00464	-0.44173	-6.40767	0.37631	2.31392	-1.80539	1.19866	-8.28612	-0.941437	-0.501573	-7.01482
IQCG	-1.59281	-4.17882	0.400952	-1.73825	-3.39003	-2.98638	-1.15404	-1.70145	-5.80212	-5.37271	-1.08786	-1.46593	-1.30345	-4.61128	-3.17942	-1.08503	-2.47402	-1.49287	-1.89046	-4.69331	-3.05604	-7.29128	-1.72649	-4.43471	-1.86049	-0.758664	-4.54844	-0.944923	-2.90874	-2.57976	-0.85094	-1.22197	-3.16909	-3.01976	-5.681	-4.14872	-7.76364	-4.97475	-1.95884	-5.19662	-3.08575	-3.5578	-3.76823	-2.45309	-5.43069	-1.46595	-2.09898	-5.78698	-3.10793
IRS1	-3.8152	-1.85689	2.61473	-6.5456	-2.9046	-0.753717	-2.24765	-1.26345	-2.21716	-5.37271	-1.81678	-1.70897	-1.30345	-0.026313	-3.17942	-1.08503	-1.33142	-5.30022	-1.23839	-4.69331	-1.47108	-1.73669	-5.97442	-3.11278	-3.08288	-5.15098	-3.54844	-5.40435	-2.90874	-2.17766	-0.327624	-0.303311	-4.26863	-5.60472	-5.681	-6.95608	-2.47824	-4.97475	-2.84336	-5.19662	-0.915822	-6.36516	0.0131274	-0.74527	0.0928683	-3.0382	-0.941437	-1.08654	-2.7669
IRS2	-2.23024	1.35516	2.83094	-0.553138	0.354133	-2.36971	-2.92411	-0.427114	0.898319	-0.980388	-0.830204	-0.389693	-0.265123	2.41109	-0.234558	-1.96033	-1.14835	-0.346028	-5.69782	-3.47091	-0.553544	1.0881	-0.652493	-3.62735	-6.98977	0.206571	5.97513	-4.40435	-2.90874	-1.89526	-0.85094	-1.50027	-0.00989275	0.277918	0.873584	-1.25564	-0.320697	0.725685	1.41039	-1.49618	-0.679754	-1.27769	-0.173286	0.673444	1.69859	-2.67141	-0.214456	-0.501573	-0.622507
ITGBL1	-5.40016	-5.76378	-4.76897	-2.29768	-5.71196	-1.12508	-4.23961	-1.26345	-4.21716	-0.243423	-2.40175	-1.46593	0.332393	-2.61128	-6.50134	-1.31831	-2.47402	-2.71526	-1.89046	-2.95634	-1.18157	-1.73669	-1.33056	-3.62735	-2.81984	0.206571	-1.089	-2.08243	-2.59679	-1.89526	-1.34545	-1.22197	-3.16909	-2.01976	-1.51108	-3.14872	-1.71925	-4.97475	-1.95884	-0.152223	-0.679754	-0.458266	-3.10527	-1.90055	-0.430694	-1.94627	-0.126993	-0.928994	-2.37097
JAG1	1.67666	-1.44185	-0.068533	-1.73825	0.170686	-0.753717	-9.73147	-1.70145	-1.71466	-0.243423	-2.40175	-1.46593	-0.870492	2.00343	-1.64336	-2.42206	-1.14835	1.0217	-0.174258	-0.470915	-0.940567	-2.20382	0.0916683	-0.849745	-1.49792	0.433981	0.258919	0.78547	-1.01183	-0.802149	-2.10383	-2.31339	-1.49102	1.24077	-0.288687	-1.70815	-2.47824	-1.38979	-0.230919	2.34254	-0.0857467	-0.637236	-2.22391	-1.80539	0.402196	-3.53124	-0.649671	-0.394658	-0.825
JUN	1.83824	0.558149	4.24784	-1.02204	1.52645	-0.598648	-0.541642	-0.655897	1.24227	-1.91327	-1.08786	-2.89219	-1.30345	1.03258	-0.643363	-1.6039	-0.269134	0.159208	0.0570677	-0.0688165	-0.940567	-0.523095	1.57247	-0.942855	-1.86049	2.31662	-0.0890043	1.00504	-1.33209	-0.672866	-0.327624	-0.303311	-1.61655	1.05349	1.41703	-3.25564	-7.76364	1.6546	0.869826	-5.19662	-0.0857467	0.78459	0.559694	-0.65954	2.1162	-2.15684	-0.307565	1.33197	2.01584
JUNB	3.50372	3.20489	1.29712	3.88659	0.697434	3.96316	1.08071	2.25748	3.59234	2.8657	3.67952	2.20232	0.487962	4.31057	3.4745	2.33517	1.47472	1.9944	3.23882	2.40823	3.02378	2.31975	2.4179	3.33348	1.2148	2.03884	2.65124	4.2839	3.5809	3.23311	2.11905	0.0536692	4.3281	1.13674	1.06046	1.12074	1.60487	1.88323	3.78319	3.70425	1.21438	2.71965	2.67747	1.25473	2.38309	1.28183	2.94542	2.14966	1.50088
KAZALD1	-5.40016	-5.76378	-4.76897	-1.73825	-5.71196	-2.36971	-1.7831	-1.70145	-5.80212	-5.37271	-0.71369	-3.72227	-0.870492	-4.61128	-2.69399	-1.31831	-1.54114	-5.30022	-5.69782	-3.95634	-3.05604	-2.20382	-5.97442	-6.43471	-3.98977	-5.15098	-4.54844	-2.597	-2.10851	-1.89526	-1.67537	-1.50027	-2.82805	-5.60472	-5.681	-6.95608	-4.17868	-4.97475	-5.5438	-5.19662	-6.40767	-6.36516	-7.35319	-5.77502	-5.43069	-4.19866	-2.09898	-5.78698	-7.01482
KCNMA1	-5.40016	-4.17882	-4.76897	-0.193929	-5.71196	-0.331026	-1.15404	-0.0560662	-1.71466	2.54018	-1.24075	-5.6698	0.160011	-2.61128	-1.64336	-1.6039	-1.54114	-2.49287	-5.69782	0.42217	-1.47108	-1.40864	-1.33056	-4.43471	-1.86049	-5.15098	-4.54844	-4.40435	-1.59679	-0.92768	-0.653	-0.303311	-4.26863	-1.2828	-2.22157	-1.63415	-1.22448	-4.97475	1.12862	-5.19662	-2.15975	-0.342789	-3.76823	-1.29389	-3.84573	-1.46595	0.119445	1.74441	-1.40011
KDM6B	0.50673	0.190417	0.785616	-0.0431041	0.516862	-0.753717	-2.24765	0.787864	-1.10168	-0.243423	-0.71369	-0.625407	-0.870492	0.55865	-0.828919	0.0624615	-0.174755	0.0217041	0.960392	0.197464	-0.393079	-0.898962	0.871069	-1.73427	-1.59745	0.206571	-0.548436	-0.082426	-0.668686	-0.566933	0.0540637	-0.175272	-0.361736	0.302166	-0.221573	-1.52981	-2.47824	0.697671	1.12862	0.531303	-0.60032	0.56558	-0.341968	-0.326556	0.350666	-1.00072	-0.126993	0.402849	0.0404583
KIAA1370	-1.59281	-2.59385	0.845737	-6.5456	-0.390029	-1.93907	-2.92411	-3.48451	-1.71466	-1.91327	-2.40175	-2.89219	-1.9335	1.24671	-2.10903	-3.12567	-1.78661	-1.9783	-3.11286	-0.233876	-4.64101	-1.73669	1.32936	-2.43471	-1.10713	0.0969462	-0.300508	0.087499	-3.34045	-3.06518	-1.67537	-0.983393	-3.61655	-1.2828	0.468742	-3.25564	-7.76364	-4.97475	0.773611	-1.49618	-1.08575	-0.972839	-0.422458	-1.13116	-1.03838	-2.37923	-1.51402	0.257419	0.184848
KIAA1467	-5.40016	-2.59385	-4.76897	-1.73825	-2.71196	-0.111909	-1.15404	-0.229694	-5.80212	0.119147	-0.605887	-1.70897	-0.870492	-4.61128	-1.64336	-0.544145	-0.469346	-2.49287	-3.11286	-3.27827	-0.940567	-0.372416	-1.72649	-1.43471	-2.81984	-5.15098	-1.96347	-2.08243	-1.10851	-0.566933	-0.85094	-0.447525	-2.12179	-3.2828	-5.681	-4.95608	-0.85675	-3.38979	-1.18625	0.125311	-4.40767	-1.97284	-2.3088	-3.19005	-2.26077	-1.46595	-1.30757	-1.32754	-4.01482
KIF2C	0.577119	0.558149	1.87488	-1.33615	1.26532	-4.08591	-2.24765	-0.229694	-2.21716	-0.728849	-2.07982	-2.01772	-1.9335	-0.026313	-0.719984	-3.12567	-0.833918	0.057328	1.80203	-1.10834	-3.05604	-4.12135	-0.652493	-1.43471	-1.98977	0.915108	1.09542	-0.944923	-2.34045	-1.63222	-1.67537	-0.983393	-0.906057	1.29009	0.810848	-1.52981	-1.22448	0.669102	-3.15148	1.34254	-1.45348	-2.19523	-7.35319	-1.42924	-0.343231	-2.37923	-2.09898	-0.501573	-7.01482
KMO	-5.40016	-5.76378	-4.76897	-8.13057	-5.71196	-2.36971	-2.92411	-2.33344	-5.80212	-0.728849	-8.57167	-3.72227	-3.05903	-4.61128	-6.50134	-2.42206	-1.54114	-5.30022	-3.11286	-1.95634	-3.05604	-1.12135	-0.167066	-6.43471	-2.81984	-5.15098	-4.54844	-2.597	-2.34045	-3.92768	-2.71601	-0.603644	-5.49102	-5.60472	-1.43308	-6.95608	-7.76364	-1.97475	-0.775618	-5.19662	-6.40767	-0.21541	-3.76823	-5.77502	-5.43069	-3.0382	-6.79942	-4.20201	-1.92736
KRT14	-5.40016	-2.59385	1.31849	-1.73825	-5.71196	0.172821	0.21836	0.0988923	-5.80212	0.856113	-0.830204	0.479946	0.753666	-4.61128	-1.85749	-0.879912	-0.469346	-5.30022	-5.69782	-6.27827	0.113881	-1.73669	-5.97442	0.46011	-2.59745	1.57694	0.258919	-3.08243	-0.523544	-1.08333	-0.062295	0.505478	-2.55242	1.55515	-5.681	-3.49664	-2.47824	-4.97475	-2.5438	-5.19662	-0.652787	-6.36516	-0.446304	-2.65954	-1.84573	-1.46595	0.575621	2.08339	-6.01482
KRT17	-1.40016	1.58495	2.82348	0.218161	5.13118	1.21787	-0.717446	0.0988923	2.74863	-5.37271	-0.328497	0.355734	0.332393	-2.02631	-0.372061	0.246886	0.618941	0.284739	-3.11286	-6.27827	0.488277	-0.372416	-5.97442	2.86221	-2.59745	3.22406	1.89451	-0.275071	0.172861	0.668171	0.527572	0.579956	-1.26863	3.94602	0.676547	-4.63415	0.230713	2.3651	-1.52143	3.66447	2.02695	-1.11723	1.00436	4.85495	2.81248	-0.723882	2.86769	2.25742	0.298059
KRT5	-5.40016	-1.85689	1.81599	-6.5456	0.265323	1.48177	-1.43685	-1.70145	-4.21716	1.85611	-2.40175	-1.06777	-1.9335	-2.02631	1.79328	0.246886	-0.985921	2.53267	-3.11286	-6.27827	-3.05604	-2.20382	-5.97442	2.11219	-3.08288	2.47107	2.13806	-0.082426	0.543895	-1.43292	-1.67537	-0.0548553	-1.49102	3.8991	-0.926117	0.535778	-2.47824	-4.97475	-2.5438	-5.19662	-3.23775	-6.36516	0.0730699	-1.83642	1.51182	-3.53124	1.80049	2.13784	-0.927361
KRT6B	-0.645273	-5.76378	1.49781	-1.73825	-3.12699	-0.45864	-4.23961	-1.26345	0.10477	-5.37271	-2.40175	-0.499876	-1.30345	5.80024	-6.50134	-4.55451	-1.33142	-1.84079	-3.11286	0.652467	-1.83365	-2.20382	-5.97442	1.4901	-6.98977	3.5179	-1.37851	-0.944923	-2.59679	0.884351	-3.82293	-0.983393	-3.61655	-0.697834	1.76194	-6.95608	-7.76364	-4.97475	-7.5438	-5.19662	1.22895	-6.36516	1.20139	-0.0201294	-5.43069	-8.28612	0.119445	1.33197	-1.8449
KRT8	5.48172	1.78312	3.79708	0.0934347	5.07676	1.54968	-1.15404	-1.26345	3.45291	4.80596	-1.24075	-0.187137	0.487962	7.53083	1.19214	-1.08503	0.275999	2.53267	2.23292	3.42563	0.644396	1.73109	4.78713	2.00824	1.62126	5.74384	2.89451	4.39331	-2.10851	1.10073	0.356831	2.48721	0.756908	3.65266	4.15347	1.30131	0.230713	4.77008	2.03928	1.62356	3.33548	4.0548	2.35071	2.14583	4.61779	0.119017	2.63729	4.70388	2.22119
LARP6	-5.40016	-2.59385	-4.76897	-0.362383	-5.71196	-2.36971	-1.43685	-0.427114	-5.80212	-5.37271	-1.81678	-2.38969	-0.870492	-4.61128	-3.17942	-4.55451	-2.47402	-1.39333	-3.11286	-6.27827	-2.31908	-1.40864	-5.97442	-3.62735	-3.08288	-5.15098	0.539027	-3.08243	-2.59679	-3.06518	-0.85094	-0.983393	-7.07598	-2.60472	-5.681	-2.43251	-7.76364	-4.97475	-7.5438	-5.19662	-6.40767	-6.36516	-2.82963	-5.77502	-5.43069	-8.28612	-2.09898	-5.78698	-3.42986
LBH	-1.15223	-1.06334	0.958948	-0.773015	-1.71196	-0.220843	-0.384953	0.593001	-1.4098	-0.980388	-0.4118	-0.756057	0.160011	-0.44135	-1.04191	-1.31831	-0.36577	-0.25583	0.256377	-1.47091	-0.734116	-0.523095	-0.167066	-1.43471	-0.945375	-0.829053	-0.963473	-0.275071	-0.668686	-0.566933	1.0616	0.964735	-1.79058	-2.79737	-1.681	-1.25564	-0.112588	-4.97475	-0.929092	-0.874689	-1.27839	-0.365157	-2.14374	-0.605092	-0.623339	-0.428144	-0.532632	1.22425	0.104117
LEF1	-0.0782325	-1.85689	-3.18401	-1.33615	-1.39003	-1.60787	-1.7831	-2.33344	-1.71466	-0.980388	-2.40175	-2.89219	-1.9335	-4.61128	-3.17942	-2.42206	-1.14835	0.223338	-5.69782	-2.10834	-2.31908	-2.20382	0.956316	-6.43471	-3.53034	-1.45054	0.0365266	-3.08243	-2.10851	-7.38711	-2.10383	-1.50027	-4.26863	-2.01976	-1.77411	-1.31222	-2.47824	-4.97475	-2.5438	-2.38926	-1.15975	-0.905725	-4.54584	-1.0562	0.569306	-2.37923	-2.09898	-0.61705	1.17993
LEMD3	0.300279	0.759783	1.42085	-0.0431041	0.170686	-0.45864	-1.15404	0.0988923	-0.342689	-5.37271	-4.32374	-0.389693	-1.30345	0.295615	-1.45695	-0.040632	-0.269134	0.314486	-3.11286	-1.10834	-0.940567	-1.40864	-0.359711	-0.734268	-2.59745	0.656374	0.773492	-0.275071	-1.92123	-0.92768	-0.188868	0.505478	-2.32109	-0.697834	0.100355	-1.09809	-2.47824	-1.1674	-1.52143	-1.49618	-1.32021	-0.873304	-1.399	-1.0562	-0.108766	-2.37923	-1.75502	-0.742581	-0.825
LIF	-0.645273	-5.76378	-4.76897	-3.22368	-5.71196	-1.93907	-1.7831	-0.427114	-5.80212	-5.37271	-2.07982	-5.6698	-1.9335	2.31946	-2.10903	-3.12567	-1.54114	-5.30022	-5.69782	-6.27827	-3.05604	-2.83185	-5.97442	-3.11278	-3.98977	-4.15098	-4.54844	-5.40435	-2.59679	-2.17766	-1.07711	-0.603644	-2.12179	-5.60472	-5.681	-6.95608	-4.17868	0.725685	-7.5438	-1.49618	-2.70724	-6.36516	-3.76823	-5.77502	-5.43069	-2.37923	-6.79942	-5.78698	-7.01482
LIFR	-0.54218	0.558149	-0.125117	-1.02204	-3.39003	-1.60787	-1.43685	-0.427114	-5.80212	-0.728849	-1.59439	-1.24834	-1.30345	-4.61128	-1.04191	-2.42206	-1.33142	3.34002	-0.449892	0.321643	-1.47108	-1.12135	1.09167	-6.43471	-6.98977	-2.34363	1.49596	-2.08243	-2.10851	-1.08333	-1.67537	-1.50027	-3.16909	-0.746744	-5.681	-0.14872	-0.320697	-4.97475	0.500592	-0.874689	-2.23775	-6.36516	-1.57184	-2.90055	-5.43069	-0.90242	-1.75502	-5.78698	-0.300579
LIMK2	0.885242	-0.304348	-0.768973	-3.22368	1.23056	-1.35411	-9.73147	-2.33344	-1.21716	-1.56535	-4.32374	-3.72227	-3.05903	-0.44135	-1.45695	-3.12567	-8.74081	-0.599784	-3.11286	0.489914	-4.64101	-2.20382	0.273507	-1.91115	-3.53034	0.492875	-1.089	1.00504	-3.90874	-3.92768	-3.82293	-1.85518	-3.16909	0.176635	1.07388	-2.00188	-7.76364	0.780133	-2.5438	-2.38926	-0.679754	0.234756	-2.82963	0.605805	0.324194	-3.0382	-2.09898	-0.0865354	-1.52297
LMCD1	-1.94073	0.190417	1.55296	1.27031	0.55483	0.672786	-0.113081	-0.655897	1.61573	1.21226	0.391225	0.0697384	-0.265123	3.25909	0.586119	-0.269109	-0.469346	1.57014	1.5968	1.77158	0.00284971	0.232283	1.96809	0.46011	-0.119404	1.87139	0.809116	1.0875	-0.33209	0.470869	0.0540637	1.2682	0.531348	1.61444	1.12635	-0.0018788	-0.85675	0.725685	0.869826	1.62356	2.03527	1.7795	0.529448	1.20988	1.06116	0.0267582	0.829938	1.53495	1.05664
LOXL1	-2.8152	-4.17882	-1.96162	-1.33615	-0.904602	-0.927484	-1.15404	-0.927927	-0.672837	0.119147	-0.949619	-1.46593	-0.870492	0.196079	-6.50134	-1.96033	-1.33142	-1.84079	-1.89046	-1.10834	-1.83365	-1.73669	0.956316	-1.43471	-1.86049	0.0969462	-1.54844	-0.082426	-1.21213	-0.92768	-0.062295	-0.783392	-2.12179	-0.904285	-1.15744	-1.20119	-1.71925	-2.97475	-1.78891	-0.44173	0.36051	0.634843	-2.06779	-1.68755	0.269746	-2.67141	0.52251	1.22425	0.468992
LRP1	1.2292	-1.44185	1.31849	-1.02204	0.627893	-0.45864	-0.920895	-1.26345	1.05586	0.797219	-2.07982	-1.06777	-3.05903	0.476187	-2.10903	-1.96033	-1.14835	0.722144	0.0570677	0.463197	-0.940567	-1.40864	0.871069	-0.734268	-0.881245	1.11581	0.206452	0.150235	-2.34045	-1.08333	-0.85094	-0.175272	-0.828054	0.372555	1.08718	-0.581036	-1.22448	-0.274315	0.0411605	1.34254	1.16218	1.00988	-1.62527	-0.121575	1.09287	-2.67141	1.03979	1.23539	0.843157
LRRC31	1.50673	-5.76378	-4.76897	-2.29768	-5.71196	-0.331026	-0.384953	-1.26345	-5.80212	-1.91327	-0.949619	-2.01772	-0.0381064	-4.61128	-2.33142	-1.6039	0.565253	-5.30022	-5.69782	-6.27827	-1.18157	-0.691366	-3.16707	-1.91115	-1.98977	-5.15098	-4.54844	-1.81939	-1.59679	-2.57976	0.0540637	-0.0548553	-2.12179	-5.60472	-5.681	-6.95608	-4.17868	-4.97475	0.616069	-0.874689	-6.40767	-6.36516	-3.26573	-4.19005	-5.43069	-0.90242	-1.09898	-5.78698	-7.01482
MAFF	0.154428	2.88008	-2.18401	1.1502	-0.464029	0.894634	-0.384953	0.238809	0.737039	0.735819	-0.245242	-0.0977777	-0.265123	1.38872	-0.109027	0.0624615	0.207558	0.191629	-0.174258	0.489914	-0.734116	1.42297	-1.45086	1.19465	-1.03557	1.75591	0.258919	1.9532	-0.270863	0.957184	-0.188868	0.0536692	0.113843	-2.79737	-1.59354	-1.20119	-0.112588	0.832601	1.27638	0.125311	-1.01536	-0.810568	0.0131274	0.276645	1.32419	-2.15684	0.0460716	-0.0865354	-1.18193
MANSC1	1.36802	-1.85689	-4.76897	-3.22368	-3.71196	-0.598648	-0.717446	-0.0560662	-5.80212	0.581491	-0.71369	-1.06777	0.160011	1.34292	-2.10903	-0.879912	-0.269134	-0.599784	-0.174258	-0.27827	-2.31908	-0.372416	-0.974421	-0.0596682	-6.98977	0.826299	-1.089	0.150235	-1.74435	-0.672866	-0.062295	-0.447525	-2.55242	-0.4348	-1.98056	-3.14872	-7.76364	-0.974754	-1.39405	-5.19662	-2.70724	-2.78019	-2.22391	-5.77502	-3.43069	-2.37923	-0.532632	-1.26341	-2.10793
MAP2K3	-0.815198	-2.59385	-4.76897	-1.33615	-5.71196	-1.12508	-0.717446	-1.70145	-2.48019	-3.37271	-8.57167	-2.38969	-0.537916	-4.61128	-4.91638	-1.96033	-1.78661	-5.30022	-0.449892	-2.69331	-1.18157	-0.898962	-5.97442	-2.11278	-6.98977	-5.15098	-4.54844	-2.597	-1.92123	-1.89526	-0.481159	-1.85518	-2.12179	-5.60472	-5.681	-6.95608	-2.47824	-4.97475	-2.5438	-5.19662	-2.94824	-4.78019	-1.96088	-2.77502	-5.43069	-3.0382	-2.47749	-2.78698	-6.01482
MAP3K4	0.243696	0.190417	2.72288	-0.553138	0.747475	-0.111909	-0.717446	-0.229694	-2.21716	-0.728849	-0.505582	-0.499876	-0.0381064	2.69251	-0.828919	-1.08503	-0.833918	0.343632	-3.11286	-0.347533	-1.83365	0.232283	-0.616869	-3.62735	-2.81984	0.755909	1.30955	-0.082426	-0.914969	-0.802149	0.0540637	0.908041	-2.12179	1.49331	0.640923	0.088319	-2.47824	-0.116773	0.237558	0.357972	-0.915822	0.0271605	-0.694983	-0.477336	0.402196	-1.00072	-0.126993	0.342308	-0.674974
MAPK10	-5.40016	-5.76378	-4.76897	-2.29768	-5.71196	-2.36971	-0.920895	-0.927927	-5.80212	1.25665	-3.36222	-1.70897	-0.0381064	-4.61128	-2.10903	-4.55451	-0.833918	-5.30022	-1.23839	0.435976	-1.18157	-2.20382	-0.930027	-6.43471	-1.28933	-0.0635185	-4.54844	-0.275071	-1.92123	-1.23736	-1.34545	-0.603644	-5.49102	-0.697834	-5.681	-4.63415	-1.22448	-4.97475	1.2954	1.5313	-2.70724	-2.45827	0.841562	-3.77502	-5.43069	-1.94627	-6.79942	-2.46505	-3.6929
MAPT	-5.40016	-5.76378	-4.76897	-3.22368	-5.71196	-1.93907	-4.23961	-2.33344	-5.80212	-3.37271	-3.36222	-2.38969	-0.537916	-4.61128	-4.91638	-1.6039	-1.14835	-5.30022	-5.69782	-6.27827	-1.18157	-4.12135	-5.97442	-6.43471	-6.98977	-2.34363	-4.54844	-1.49746	-3.90874	-3.92768	-0.653	-1.22197	-2.55242	-5.60472	-5.681	-6.95608	-7.76364	-4.97475	-3.15148	-5.19662	-6.40767	-6.36516	-7.35319	-7.35998	-5.43069	-8.28612	-2.47749	-5.78698	-7.01482
MAS1	-5.40016	-5.76378	-4.76897	-1.02204	-5.71196	-0.927484	-1.15404	-0.427114	-5.80212	-2.37271	-1.24075	-2.38969	-0.537916	-4.61128	-2.69399	-0.151663	-0.469346	-5.30022	-5.69782	-6.27827	-1.47108	-1.40864	-5.97442	-6.43471	-2.81984	-5.15098	-4.54844	-5.40435	-1.45384	-2.17766	-1.34545	0.34175	-3.16909	-5.60472	-5.681	-6.95608	-2.47824	-4.97475	-7.5438	-5.19662	-6.40767	-6.36516	-7.35319	-5.77502	-5.43069	-2.37923	-1.51402	-5.78698	-7.01482
MCCC2	-1.94073	-1.85689	-4.76897	-1.02204	-5.71196	-4.08591	-0.920895	0.0988923	-5.80212	-2.37271	-1.24075	-3.72227	-1.9335	-0.026313	-1.45695	-3.12567	-0.985921	-5.30022	-5.69782	-1.63441	-4.64101	-1.40864	-5.97442	-3.62735	-3.98977	-4.15098	-4.54844	-4.40435	-1.74435	-1.89526	-1.07711	-0.983393	-3.16909	-3.60472	-5.681	-4.14872	-0.85675	-4.97475	-2.11754	-5.19662	-6.40767	-2.36516	-3.10527	-5.77502	-5.43069	-1.59962	-2.47749	-3.20201	-7.01482
MDM2	0.749587	0.662486	2.34997	-1.73825	1.56417	-1.93907	-2.24765	-0.427114	-0.592667	0.212257	-2.07982	-1.24834	-0.870492	1.38872	-0.643363	-3.12567	-0.70189	1.61864	0.568967	1.33644	-4.64101	-1.40864	1.81999	-1.04239	-1.18241	1.17095	2.64139	1.0875	-1.59679	-0.101709	-0.85094	-0.603644	-0.988519	1.02463	1.10036	1.17835	-1.71925	0.932136	2.72298	1.93267	-0.23775	0.174002	0.486009	0.844592	1.53509	-0.90242	1.77801	1.84238	1.13999
MELK	1.15443	1.08171	2.32906	0.218161	1.02951	0.0840116	0.312928	-0.655897	0.17516	0.485275	-0.505582	-0.625407	-0.265123	-0.44135	0.0222178	0.927443	0.275999	0.677056	1.52135	-0.0688165	0.850847	0.719948	0.134104	-0.942855	-0.881245	2.1528	1.97513	0.150235	-0.591793	0.242245	0.945055	0.34175	0.560643	0.934434	0.640923	-1.59852	-1.22448	1.88323	-2.84336	1.22965	-1.76382	-0.155704	-3.54584	-1.83642	1.6137	-2.67141	-0.0312342	-2.08654	-3.10793
MFAP5	-5.40016	-5.76378	-4.76897	-3.22368	-1.46403	-1.12508	-1.7831	-2.33344	-2.80212	1.05356	-2.81678	-3.72227	-1.30345	-4.61128	-1.64336	-3.12567	-2.98592	-4.30022	-5.69782	-6.27827	-2.31908	-1.12135	-0.330565	-3.62735	-3.08288	-0.293	-4.54844	-1.81939	-2.90874	-0.802149	-0.327624	-1.22197	-2.32109	-2.60472	-2.51108	-2.31222	-7.76364	-4.97475	-4.22187	-5.19662	0.0680586	-6.36516	-3.54584	-0.805391	-1.43069	-4.19866	-1.30757	-0.699512	-7.01482
MGP	-3.8152	4.46624	4.02544	-0.193929	2.00229	3.21133	0.00662595	-2.33344	2.67766	4.53869	-0.16653	2.21981	1.34572	2.31946	3.20774	-3.12567	-0.985921	6.64595	2.86823	2.87655	3.21026	0.79087	3.8742	3.5667	4.01586	5.59973	1.94342	2.19556	-2.59679	5.47746	-0.85094	0.34175	0.439718	6.87985	3.63188	3.77185	0.940263	8.41192	3.62988	6.14212	7.04225	3.32659	2.46379	2.8137	5.48966	0.711055	5.73756	3.08647	4.68084
MIA	1.80929	4.33162	-2.18401	0.439289	-1.46403	3.2418	1.72437	0.48472	2.08662	-0.243423	-0.245242	3.49151	0.487962	-1.02631	1.3813	0.0624615	-0.985921	4.62013	-3.11286	3.38529	0.00284971	-0.523095	-5.97442	1.77961	-2.18241	2.9783	-4.54844	-3.08243	0.442735	0.668171	1.0616	1.07314	0.781999	1.69906	-0.726808	-0.464222	-1.71925	0.806605	-3.63691	-5.19662	-0.363281	-6.36516	0.83168	-2.90055	-0.0731416	-4.19866	4.25993	-5.78698	-4.6929
MKI67	0.50673	1.00441	1.20831	-2.29768	-0.582674	-0.598648	-0.920895	-0.229694	-0.994765	-1.91327	-0.4118	-1.06777	0.160011	-0.611275	-0.547148	-1.31831	-0.833918	0.223338	0.841339	-1.23388	0.113881	-0.372416	-0.804496	-1.14931	-1.86049	0.576939	0.40576	0.323566	-1.21213	-1.23736	-0.327624	0.0536692	-1.37554	-0.0501359	-0.593542	-1.59852	-7.76364	-2.97475	-1.95884	-5.19662	-2.15975	-6.36516	-3.10527	-2.35998	-2.84573	-3.0382	-2.09898	-1.32754	-2.37097
MLPH	-0.312698	-0.763779	-4.76897	-1.73825	-5.71196	-0.331026	-1.43685	-0.229694	-1.55419	0.119147	-1.81678	-1.70897	0.160011	-0.44135	-3.69399	-1.31831	-0.269134	-5.30022	-3.11286	-0.956342	-0.393079	-0.898962	-3.65249	-1.73427	-2.81984	-5.15098	-4.54844	-0.649467	-0.914969	-2.17766	-0.188868	0.0536692	-1.16909	-5.60472	-5.681	-4.95608	-2.47824	-4.97475	0.800494	-0.44173	-6.40767	-3.19523	-2.4463	-4.55262	-5.43069	-1.59962	-0.532632	-1.78698	-3.42986
MLXIP	2.36802	1.47463	2.18522	-0.773015	1.9954	-0.45864	-1.7831	-0.655897	1.4267	0.408654	-0.949619	-1.06777	0.160011	1.47619	-0.372061	-1.31831	-1.33142	0.928595	1.85677	1.26862	-1.47108	0.021604	0.683791	0.333477	-1.70437	2.34087	1.62149	0.453627	-1.01183	-0.672866	-1.07711	-0.983393	0.263868	2.20263	1.44828	-0.432513	-1.22448	1.31065	-1.18625	0.357972	0.511188	-0.117229	-0.571835	-0.121575	1.33749	-2.67141	0.200582	0.119916	-0.156843
MMP11	-5.40016	-5.76378	-4.76897	0.538318	1.56417	1.21787	-2.92411	-1.26345	1.57292	4.1838	0.169796	-0.756057	-0.537916	0.973687	-0.0419125	-1.08503	-1.14835	-2.71526	0.960392	-0.754708	-1.47108	-0.691366	0.683791	1.68423	-1.70437	-3.56602	0.621489	-0.760498	-0.270863	-0.92768	-0.653	-0.447525	-0.754054	0.123196	-0.323453	-0.708148	1.60487	-4.97475	-0.17748	-0.44173	1.95427	1.96127	-1.4463	2.07881	0.0611595	-0.810391	2.54043	1.95449	-2.7669
MPV17L	-0.190707	-2.59385	-4.76897	-2.29768	-2.01152	-0.598648	-0.920895	-0.427114	-5.80212	1.94922	-2.07982	-3.72227	-0.0381064	-0.026313	-2.10903	-3.12567	-1.33142	-2.49287	-3.11286	-1.23388	-1.18157	-1.40864	-4.97442	-1.73427	-2.81984	0.340872	-0.156118	1.45363	-1.74435	-1.43292	-0.188868	1.69836	-3.16909	-0.697834	-1.43308	-6.95608	-7.76364	-3.97475	2.491	-0.874689	-1.27839	-1.5578	-1.33083	-5.77502	-0.572713	-1.33193	-1.75502	1.99438	-0.156843
MTMR1	1.88524	-1.44185	1.31849	-0.773015	-0.220104	-0.753717	-1.43685	-1.26345	-1.10168	-0.565351	-1.81678	-1.46593	-0.537916	0.196079	-1.04191	-1.96033	-2.0826	-0.212761	-3.11286	-0.128523	-1.83365	-0.22519	-0.167066	-0.225254	-1.98977	-5.15098	1.30955	-0.275071	-1.92123	-2.17766	-1.07711	-0.175272	-1.37554	0.20263	0.100355	-1.46422	-7.76364	1.11271	-1.29587	0.357972	-1.65279	-0.117229	-1.82963	-1.42924	0.028738	-1.76256	-0.799418	-1.03209	0.223581
MYBL1	-5.40016	-0.119923	-4.76897	-0.362383	2.16456	0.545524	-0.241618	0.0988923	1.26397	-5.37271	-0.091891	-1.24834	-0.870492	-0.803921	-1.64336	-1.08503	-0.580938	0.454664	-0.449892	-0.0303424	0.00284971	0.579086	-1.02022	-1.57673	-2.81984	-0.0216983	-1.54844	-0.194901	-1.01183	-0.456374	0.605918	-0.0548553	0.113843	0.854707	-2.51108	-1.02534	0.0692499	1.46819	-1.00464	0.357972	-1.76382	-2.66472	-2.4463	-0.0745772	0.854709	-1.0963	-0.532632	-2.97962	-1.46024
MYBL2	2.27932	1.90865	2.99921	0.714923	2.27104	0.894634	-1.15404	0.593001	-0.129695	1.52211	-0.245242	0.219811	0.487962	2.98864	0.509883	0.331889	-0.36577	1.63051	3.67939	2.83287	-0.393079	0.579086	1.93847	0.999921	0.149782	3.76788	3.52838	2.66711	-0.33209	1.23127	0.527572	0.505478	1.36281	3.26255	1.57638	1.5792	0.740186	3.43039	-0.334349	3.20852	0.347213	0.467733	-1.14374	1.05365	1.98716	0.119017	0.873007	1.91346	-0.328324
MYC	1.88524	3.72807	3.26445	3.87751	4.14447	0.256479	0.21836	0.238809	2.08662	0.856113	0.107809	-0.625407	-1.30345	2.72857	2.4845	-0.269109	-0.833918	2.21548	2.32455	1.98382	0.568447	3.23913	0.273507	2.06115	-1.10713	2.99877	5.67436	2.85774	0.333944	1.77276	-1.07711	-0.0548553	3.48435	2.94986	2.80281	0.383775	0.740186	3.74292	1.80271	2.82019	1.74714	0.0442341	1.94601	-0.0201294	4.37021	-0.571879	1.97866	2.98781	1.07264
MYH11	-5.40016	-5.76378	-4.76897	-2.29768	-5.71196	-1.35411	-1.15404	-1.26345	-3.48019	-5.37271	-2.40175	-2.38969	-1.30345	0.196079	-3.69399	-1.31831	-1.14835	-5.30022	0.0570677	0.164674	-3.05604	-1.73669	0.683791	-0.849745	-2.81984	-5.15098	-4.54844	-0.944923	-3.90874	-1.63222	-0.653	-0.175272	-2.82805	-5.60472	-5.681	-6.95608	-7.76364	-4.97475	0.963993	-1.49618	-6.40767	-0.750447	-7.35319	-2.35998	-2.10877	-4.19866	0.731963	-2.97962	-1.52297
NANOG	-1.40016	-1.44185	-4.76897	-1.73825	-5.71196	-0.220843	-1.7831	-2.33344	-2.48019	-2.37271	-2.07982	-1.06777	-0.870492	-3.61128	-3.69399	-1.6039	-1.54114	-5.30022	-1.89046	-2.95634	-1.83365	-0.101454	-5.97442	-6.43471	-3.53034	-3.15098	-3.54844	-3.08243	-2.34045	-1.89526	-0.327624	1.5935	-4.26863	-5.60472	-3.681	-6.95608	-7.76364	-4.97475	-2.33435	-5.19662	-6.40767	-6.36516	-7.35319	-3.77502	-5.43069	-2.67141	-1.75502	-5.78698	-7.01482
NAP1L1	3.51273	4.32368	6.96616	-0.362383	3.75972	1.08973	-2.92411	-0.427114	3.2119	3.48838	-0.830204	0.219811	-0.265123	5.47353	2.04169	-0.700362	-0.0897573	4.88465	3.97284	3.98969	0.31319	2.36515	4.64855	1.97043	1.7751	4.87277	6.6677	3.34719	-1.10851	2.0967	-0.85094	-0.175272	2.22093	4.27333	3.89075	3.40587	1.71816	4.85338	1.90947	5.27607	3.77844	3.4325	3.43226	3.71617	5.24879	1.30259	3.4076	4.28046	3.85554
NAT1	-2.8152	-4.17882	-4.76897	-2.29768	-5.71196	-4.08591	-1.43685	-1.26345	-4.21716	-5.37271	-1.4118	-1.46593	-0.537916	-4.61128	-3.17942	-1.6039	-1.33142	-5.30022	-1.23839	-6.27827	-1.18157	-1.40864	-5.97442	-3.62735	-2.59745	-5.15098	-4.54844	-2.08243	-2.34045	-1.89526	-1.07711	-1.22197	-2.32109	-5.60472	-5.681	-6.95608	-7.76364	-4.97475	-4.22187	-5.19662	-6.40767	-6.36516	-5.03127	-7.35998	-5.43069	-3.53124	-1.30757	-5.78698	-7.01482
NCAPD2	0.749587	2.37065	2.52565	-1.73825	2.17069	0.0840116	-0.920895	-1.26345	0.657311	0.212257	-1.24075	-0.499876	-0.265123	0.973687	0.908047	-0.700362	-0.269134	2.53267	1.52135	-0.66356	-0.393079	0.41608	0.417897	-0.0596682	-0.799944	2.22406	3.49596	1.00504	-1.74435	-0.187439	0.0540637	0.908041	0.341871	2.34364	1.88124	-0.652294	0.375911	1.57983	-1.63691	1.78066	-1.05012	-1.78019	-1.62527	-0.775017	1.4022	-1.94627	-1.51402	0.782881	-0.9063
NCOR2	2.26518	3.72807	2.57088	1.62432	2.00914	0.477419	-0.241618	0.787864	1.35775	1.21226	1.10605	2.28937	-0.0381064	3.00343	0.586119	-0.879912	-0.469346	2.21548	2.95682	1.48328	0.488277	0.41608	1.3017	0.940332	-0.741841	2.46373	2.96726	2.23227	1.01628	1.2016	-0.327624	-0.0548553	1.56787	2.18969	1.81085	0.91429	-0.320697	1.46819	0.773611	2.06077	0.859112	1.43574	0.529448	0.582535	1.54659	0.553079	0.873007	1.14376	0.524335
NDC80	-0.400161	0.936661	0.985915	-2.29768	-0.624494	-1.35411	-2.92411	-1.26345	-2.21716	-3.37271	-2.81678	-2.89219	-1.30345	-1.02631	-2.33142	-2.42206	-0.985921	-0.840792	0.568967	-2.69331	-0.940567	-1.73669	-1.65249	-1.91115	-3.98977	-0.196785	1.23292	-1.81939	-3.34045	-1.23736	-0.653	-0.303311	-0.906057	0.349472	-0.774114	-3.14872	-2.47824	0.273173	-7.5438	0.993207	-3.60032	-6.36516	-7.35319	-3.19005	-5.43069	-3.0382	-2.47749	-5.78698	-5.01482
NDST1	0.622207	0.190417	1.55296	-0.0431041	0.120933	-0.753717	-0.541642	-0.927927	0.220248	-0.565351	-1.08786	-0.756057	-1.9335	-2.61128	0.240123	-3.12567	-1.33142	-0.170941	2.45193	1.66424	-1.47108	-0.101454	0.292366	0.251793	-2.59745	2.06819	1.47393	1.59565	-1.33209	-0.101709	-0.481159	-0.447525	-0.157119	0.349472	0.74526	-1.02534	-0.112588	1.69767	0.439192	-1.49618	0.967365	0.774394	-0.319772	0.147815	0.926858	-1.33193	0.329865	-0.00561536	-0.144459
NEDD9	-1.15223	-2.59385	1.08901	-3.22368	-1.31964	-0.220843	-1.43685	-1.70145	-2.80212	-1.91327	-1.24075	-2.89219	-0.870492	-4.61128	-4.91638	-1.6039	-0.833918	-0.212761	-5.69782	-0.233876	-2.31908	-2.83185	-0.482568	-3.62735	-1.86049	-1.82905	-4.54844	-5.40435	-3.90874	-1.89526	-1.34545	-0.603644	-7.07598	-2.79737	-0.774114	-1.95608	-2.47824	-1.1674	-0.698312	-5.19662	-0.341586	-1.1557	-2.4463	-0.0201294	-0.343231	-4.19866	-0.941437	-1.46505	-1.06063
NFAT5	2.06744	0.936661	3.7663	-1.73825	1.23056	-0.331026	-0.241618	-0.0560662	0.407333	1.15086	-1.4118	-1.46593	-1.9335	3.27137	-0.31152	-3.12567	-0.833918	1.75506	0.0570677	0.851013	-0.940567	0.975508	2.3156	-0.734268	-0.945375	1.77976	2.50685	1.1655	-1.33209	0.716176	-0.653	-0.303311	-0.988519	1.57518	1.57638	0.233749	-1.22448	1.84542	0.0411605	1.99321	0.292765	0.553706	0.811712	2.15966	1.78847	-1.33193	2.4076	1.11992	1.86782
NNT	1.50673	0.323684	2.84574	-2.29768	1.58266	0.330733	-0.717446	-1.70145	0.367805	-0.418509	-1.81678	-1.70897	-1.30345	-0.803921	-0.109027	-1.96033	-0.833918	1.82906	-1.23839	-0.0688165	-1.18157	1.42297	0.273507	-3.62735	-1.70437	-0.758664	1.99072	1.05508	-1.92123	-3.92768	-1.67537	-0.303311	-0.906057	1.5652	1.20164	-0.78615	-2.47824	2.60267	-1.10086	0.710273	-0.0326354	-0.458266	-0.723838	0.217449	0.523503	-2.37923	0.0460716	0.257419	-0.132181
NOP16	1.62221	1.78312	0.400952	1.53121	1.79584	-0.753717	-1.7831	-0.655897	-0.672837	0.212257	-1.24075	-1.06777	-0.265123	-0.151844	1.79328	-1.08503	-1.78661	0.557757	0.711571	-1.03034	-2.31908	-0.523095	0.698004	1.30676	-1.18241	1.34087	1.9273	1.00504	-0.270863	-0.672866	-2.10383	-1.50027	0.731373	0.349472	1.11341	-1.78615	-2.47824	3.12853	-1.00464	1.78066	-1.23775	-1.45827	-0.893763	-1.57862	0.873087	-1.0963	-0.941437	0.0459149	-0.429862
NOTCH1	0.789664	2.90156	4.26169	0.0934347	3.0954	-0.598648	-0.717446	-1.26345	1.20911	-0.565351	-1.59439	-0.389693	-1.30345	1.43312	-0.372061	-0.879912	-2.0826	1.09209	1.07036	1.37994	-1.47108	0.41608	-0.726493	0.293213	-1.98977	2.74989	0.877829	0.377006	-1.21213	-1.23736	-2.10383	-0.983393	0.299057	0.82154	0.761939	-0.432513	-1.71925	1.69767	-0.636911	1.5313	0.742072	-0.256632	-0.533016	-0.18007	1.76898	-0.810391	0.873007	-0.465047	-0.0840868
NOTCH2	0.154428	2.43098	3.2534	0.714923	2.52645	-0.331026	-2.92411	-3.48451	1.87736	1.44747	-2.07982	-0.282399	-9.32582	1.47619	0.811539	-1.96033	-1.54114	2.53898	2.70732	1.24529	-1.47108	0.496624	2.18545	0.49603	-0.667841	2.76191	3.28445	2.15789	-1.59679	0.112734	-2.10383	-0.983393	1.13834	1.93443	2.35791	0.444804	-1.22448	2.13377	1.00694	2.78066	1.31342	1.65721	-0.223912	1.77188	2.82669	-0.723882	2.09843	1.50765	1.60723
NOTCH3	1.1848	0.850931	3.72688	-0.362383	1.36486	0.732441	0.486491	-0.427114	1.4925	1.88468	0.107809	0.646965	1.2629	2.95858	0.553938	-0.879912	0.275999	1.61864	3.88714	3.06603	0.488277	1.28992	2.50536	1.82739	-0.0355727	2.27528	2.90278	2.88105	-0.270863	0.841707	-0.327624	0.34175	1.07884	1.99519	0.842557	0.535778	0.230713	1.95598	1.87405	3.55827	1.98034	2.37631	1.58344	1.17918	1.43967	0.0267582	1.59719	1.79045	1.7131
NOTCH4	-0.0782325	-1.85689	-0.18401	-1.02204	-2.25253	-0.45864	-1.15404	-1.26345	-2.21716	-0.980388	-1.08786	-1.46593	-1.30345	-1.28935	-6.50134	-3.12567	-2.98592	-2.49287	0.410705	-0.347533	-3.05604	-0.898962	0.610542	-4.43471	-6.98977	-0.0216983	-3.54844	-0.649467	-2.34045	-0.802149	-1.67537	-0.175272	-3.16909	-0.746744	-1.98056	-2.20119	-1.71925	-1.51532	-0.0439561	0.710273	-1.23775	-1.04323	-2.22391	-1.74527	-3.43069	-1.94627	-1.51402	-0.742581	-0.825
NQO1	4.16208	0.190417	-0.768973	-0.193929	1.86547	-0.598648	-2.24765	-0.0560662	1.37779	-0.980388	-2.40175	-0.899727	-0.0381064	3.59818	0.46444	-1.08503	-2.47402	2.65397	0.711571	1.33644	-1.18157	-0.691366	4.06038	1.32684	1.18016	3.80902	1.33421	2.21036	-0.914969	1.26394	-0.188868	0.251206	-1.61655	2.23448	2.19551	-0.513132	-4.17868	1.3828	-0.566522	3.72522	-2.32021	2.00553	-2.06779	-5.77502	0.184016	-1.0963	1.22849	1.45143	-2.8449
NR2F2	-5.40016	0.190417	-4.76897	-2.29768	-5.71196	-1.12508	-1.43685	-9.75129	-5.80212	-5.37271	-3.36222	-2.38969	-1.9335	-4.61128	-3.17942	-1.96033	-2.47402	-5.30022	-5.69782	-2.57783	-1.83365	-2.20382	-5.97442	-6.43471	-6.98977	-5.15098	-4.54844	-5.40435	-2.59679	-2.17766	-3.82293	-0.603644	-4.26863	-5.60472	-5.681	-3.14872	-7.76364	-1.1674	-2.33435	-5.19662	-5.40767	-6.36516	-7.35319	-3.90055	-3.10877	-4.19866	-2.99206	-5.78698	-4.6929
NUF2	-0.00784314	0.759783	2.82348	-1.02204	1.27673	-0.111909	-1.43685	-0.655897	-0.480192	-1.20278	-0.245242	-3.72227	-0.870492	1.14361	-0.31152	-1.6039	-1.14835	1.3722	2.08354	-0.956342	-1.83365	-1.73669	0.235032	-0.734268	-1.86049	1.18887	0.773492	0.377006	-2.10851	-0.566933	-0.85094	-3.01046	0.0325425	1.93443	-1.15744	-1.70815	-0.85675	0.548808	-3.63691	1.71027	-2.50078	-4.04323	-7.35319	-2.45309	-0.00442886	-3.0382	-1.09898	-1.69951	-7.01482
NUMB	1.59984	-4.17882	1.69046	-2.29768	1.02951	-1.12508	-1.43685	-2.33344	0.50166	0.408654	-1.4118	-1.06777	-1.30345	2.71065	-1.85749	-1.96033	-0.833918	0.400216	0.960392	1.30669	-0.940567	-1.40864	0.739825	-0.849745	-1.59745	1.94705	1.00615	0.323566	-2.10851	-0.92768	-1.07711	-0.303311	0.0325425	0.804666	1.54781	-1.07343	-2.47824	1.19517	-0.0843704	1.12531	0.914253	0.293055	0.0730699	-0.417465	0.591674	-1.46595	0.329865	0.342308	-0.0840868
OLFML2B	-0.190707	-2.59385	-1.18401	-2.29768	-0.188395	-0.927484	-1.15404	-1.26345	-1.71466	-0.243423	-1.24075	-5.6698	-0.870492	-0.44135	-1.64336	-2.42206	-1.54114	-0.442243	0.711571	-0.128523	-0.734116	-0.898962	-0.273981	-2.73427	-1.98977	-0.627419	-4.54844	-0.649467	-2.90874	-0.364744	-0.85094	-0.303311	-4.26863	-0.904285	-1.35908	-1.07343	-1.71925	-2.38979	-0.44577	0.869472	-0.29915	-0.557802	-2.3088	-0.98494	-0.260769	-1.33193	-0.799418	-0.539048	-0.0261394
OLIG2	-5.40016	0.0435757	-4.76897	-1.33615	-5.71196	-2.98638	-2.24765	-0.927927	-5.80212	-3.37271	-2.40175	-1.46593	-0.870492	-4.61128	-6.50134	-1.31831	-5.74081	-5.30022	-5.69782	-6.27827	-1.47108	-2.83185	-5.97442	-6.43471	-3.98977	-5.15098	-4.54844	-5.40435	-2.10851	-3.06518	-1.67537	-0.983393	-4.26863	-5.60472	-5.681	-6.95608	-2.47824	-4.97475	-4.22187	-5.19662	-6.40767	-6.36516	-7.35319	-7.35998	-5.43069	-2.37923	-6.79942	-5.78698	-7.01482
OMD	-2.23024	-2.59385	-4.76897	-1.33615	-5.71196	-0.598648	-1.7831	-0.655897	-5.80212	-5.37271	-2.40175	-5.6698	-1.30345	-4.61128	-3.69399	-2.42206	-1.78661	-5.30022	-5.69782	-6.27827	-1.83365	-4.12135	-5.97442	-1.57673	-3.53034	-5.15098	-3.54844	-5.40435	-1.45384	-1.43292	-0.188868	-0.447525	-7.07598	-5.60472	-5.681	-6.95608	-7.76364	-4.97475	-4.22187	-5.19662	-6.40767	-6.36516	-7.35319	-7.35998	-5.43069	-8.28612	-6.79942	-1.20201	-2.37097
ORC6L	-1.59281	-5.76378	0.275421	-2.29768	0.24224	-1.93907	-2.92411	-9.75129	-3.48019	0.119147	-2.40175	-2.38969	-1.9335	0.636652	-1.33142	-4.55451	-2.98592	0.057328	-0.174258	-0.347533	-2.31908	-1.73669	0.549141	-2.43471	-2.34591	1.38818	-1.37851	-4.40435	-2.59679	-1.43292	-3.82293	-3.01046	-1.79058	1.0677	-0.774114	-2.20119	-1.71925	0.517099	-4.22187	1.85867	-1.88411	-1.11723	-5.76823	-1.21023	-0.786837	-3.53124	-1.75502	-0.202013	-4.6929
PAIP2B	-5.40016	-1.85689	-4.76897	-0.773015	-5.71196	-2.98638	-0.920895	-2.33344	-5.80212	-5.37271	-2.07982	-1.70897	-0.0381064	-4.61128	-3.69399	-3.12567	-0.985921	-5.30022	-5.69782	-6.27827	-3.05604	-1.12135	-5.97442	-6.43471	-3.53034	-3.56602	-4.54844	-5.40435	-3.34045	-3.06518	-1.34545	0.157033	-7.07598	-5.60472	-5.681	-6.95608	-2.47824	-4.97475	-2.11754	-2.38926	-6.40767	-6.36516	-7.35319	-4.19005	-5.43069	-3.53124	-6.79942	-5.78698	-7.01482
PALMD	-5.40016	-5.76378	-4.76897	-1.73825	-5.71196	-2.36971	-1.43685	-1.70145	-5.80212	-2.37271	-0.71369	-0.899727	-0.0381064	-4.61128	-1.64336	-2.42206	-1.78661	-3.30022	1.35746	0.147995	-4.64101	-0.898962	-2.8045	-0.734268	-4.98977	0.492875	-4.54844	0.618014	-2.34045	-1.63222	-1.67537	0.505478	-2.55242	-4.60472	-4.09604	-6.95608	-2.47824	-4.97475	-0.929092	-5.19662	-0.574785	-1.27769	-2.82963	-3.03805	-5.43069	-2.15684	-2.09898	-2.78698	-3.42986
PASK	0.992157	0.0435757	-0.521045	-0.0431041	-5.71196	-0.45864	-1.7831	-0.927927	-4.21716	-5.37271	-0.16653	-0.499876	-9.32582	-4.61128	-1.45695	-0.700362	-0.985921	-4.30022	1.44173	-0.754708	-1.18157	-1.73669	-1.72649	-0.167921	-3.53034	-0.0635185	-1.089	0.724929	-2.10851	-1.08333	-0.85094	-0.603644	0.0325425	-0.4348	-0.980565	-3.78615	-0.85675	0.0696398	-1.78891	-2.38926	-1.15975	-2.5578	-2.96088	-1.80539	-0.907132	-0.428144	-2.99206	-2.32754	-2.06063
PCSK5	0.381199	-5.76378	-2.18401	-1.73825	-5.71196	-0.753717	-0.920895	-0.0560662	-1.55419	-2.37271	-2.81678	-2.38969	-3.05903	-4.61128	-1.33142	-1.96033	-0.833918	-2.49287	-5.69782	-2.95634	-0.940567	-1.12135	-2.51499	-2.73427	-3.98977	-1.24409	-4.54844	-3.08243	-2.59679	-2.17766	-1.34545	-0.447525	-2.82805	-2.01976	-5.681	-6.95608	-1.22448	-4.97475	-2.11754	-2.38926	-4.08575	-2.45827	-3.10527	-3.19005	-5.43069	-1.76256	-0.649671	-3.78698	-2.31438
PDGFA	1.27226	-1.44185	-4.76897	-1.33615	-3.39003	-1.12508	-1.15404	-0.927927	-5.80212	-0.418509	-1.81678	-0.756057	-0.870492	-1.61128	-1.85749	-4.55451	-1.78661	-5.30022	-1.23839	-2.10834	-1.18157	-1.12135	-1.88696	-3.62735	-2.81984	-5.15098	-1.089	-0.760498	-2.10851	-1.89526	-1.07711	-0.783392	-2.82805	-5.60472	-5.681	-4.63415	-2.47824	-3.97475	-2.33435	-5.19662	-2.40767	-1.50718	-2.65276	-2.45309	-5.43069	-3.0382	-1.30757	-5.78698	-3.6929
PDLIM4	-3.8152	-0.763779	-0.599048	-0.553138	-5.71196	-0.111909	-0.920895	-0.427114	-5.80212	-5.37271	0.338222	-0.0977777	-0.265123	-4.61128	-3.17942	-0.879912	0.207558	-0.776662	-1.23839	-6.27827	-0.553544	-1.40864	-5.97442	-1.04239	-1.59745	-5.15098	-4.54844	-1.49746	-0.391679	-0.364744	0.356831	0.785923	-1.61655	-1.4348	-5.681	-2.78615	-1.71925	-4.97475	-1.29587	-2.38926	-3.08575	-4.36516	-2.3088	-2.35998	-5.43069	-0.90242	-1.51402	-5.78698	-4.01482
PFKFB3	0.885242	0.190417	1.75459	-2.29768	2.63234	-1.12508	-2.24765	-2.33344	0.327163	-0.980388	-1.81678	-1.46593	-1.9335	1.14361	0.331546	-3.12567	-2.0826	0.557757	2.27946	-0.550349	-2.31908	-1.40864	-0.514989	-0.434708	-1.03557	1.50723	2.50685	0.881048	-2.59679	-1.08333	-1.07711	-1.85518	-0.41777	1.7616	0.448278	-0.201188	-2.47824	2.05867	-0.566522	3.5347	0.636719	0.467733	-0.022278	-0.0745772	1.45195	-2.67141	0.119445	0.782881	0.629032
PFKM	0.622207	1.99111	0.958948	-0.773015	-0.582674	-0.598648	-1.43685	-0.927927	0.657311	0.485275	-1.4118	-0.625407	-1.30345	0.912286	-0.161494	-1.31831	-0.469346	0.765865	0.256377	-0.347533	-1.47108	-0.691366	-0.548156	-1.91115	-3.53034	1.03884	3.31575	1.7352	-0.523544	-0.456374	0.163135	0.34175	0.113843	0.918837	-0.00857931	0.272744	-0.563968	1.3828	-0.566522	0.993207	-1.36328	-1.04323	-0.694983	-2.90055	0.677831	-1.46595	1.00148	0.342308	-1.65727
PGR	-5.40016	-5.76378	-4.76897	-1.33615	-5.71196	-2.98638	-4.23961	-1.70145	-5.80212	-5.37271	-0.949619	-1.70897	-1.30345	-4.61128	-3.17942	-1.96033	-1.78661	-5.30022	-5.69782	-6.27827	-1.83365	-1.12135	-5.97442	-6.43471	-3.53034	-5.15098	-4.54844	-5.40435	-2.34045	-2.57976	-0.653	-0.0548553	-7.07598	-5.60472	-5.681	-6.95608	-4.17868	-4.97475	-2.11754	-5.19662	-6.40767	-6.36516	-7.35319	-7.35998	-5.43069	-2.67141	-2.99206	-5.78698	-7.01482
PHGDH	-5.40016	3.04035	5.61581	-2.29768	2.43779	0.672786	-1.7831	-2.33344	-4.21716	2.39548	-2.40175	-1.06777	-0.537916	-4.61128	0.698328	-2.42206	-1.33142	4.1344	3.57131	4.23644	-1.47108	0.41608	0.417897	-0.653348	-1.18241	4.26898	4.4767	0.502536	-1.92123	1.66001	-2.10383	-0.603644	1.7851	4.42732	3.35242	1.40148	-0.112588	3.33358	-2.33435	3.1208	2.19224	1.67924	-0.753282	0.510385	3.38949	-1.94627	2.99824	1.69684	0.792531
PHLDA2	0.789664	-2.59385	-4.76897	-6.5456	-4.12699	-0.753717	-0.384953	-1.26345	-4.21716	0.0196118	-2.81678	-1.70897	-3.05903	0.0891643	-1.64336	-1.96033	-0.833918	-5.30022	-5.69782	-0.420289	-0.940567	-0.691366	-0.359711	-1.73427	-2.34591	0.603906	-4.54844	-0.0120367	-3.90874	-1.89526	-1.34545	-0.983393	-4.26863	-3.2828	-5.681	-6.95608	-4.17868	0.579835	-4.22187	0.357972	-3.82271	-4.04323	-0.598307	-3.55262	-5.43069	-2.37923	-1.09898	-5.78698	-7.01482
PHLDB1	1.10763	1.99111	1.03838	-0.553138	1.4975	0.256479	-1.7831	-1.26345	1.72144	1.10303	-1.08786	0.646965	-0.870492	3.04694	0.280016	-1.6039	-1.14835	1.59459	1.73681	1.36559	-0.393079	0.918174	1.37431	0.150255	-0.881245	1.74384	1.97513	2.2467	-1.92123	0.361081	-1.67537	-2.31339	-0.157119	1.91098	1.13917	-0.546684	-0.85675	0.858136	1.47301	0.993207	1.05993	1.49903	-2.54584	0.534838	1.89123	-0.810391	1.19493	1.42248	0.468992
PKIA	-5.40016	-5.76378	2.16176	-0.362383	-5.71196	-1.12508	-1.7831	-1.70145	-5.80212	-3.37271	-1.24075	-2.38969	-0.870492	-4.61128	-6.50134	-1.96033	-0.985921	0.314486	-5.69782	-6.27827	-4.64101	-0.691366	-5.97442	-3.11278	-6.98977	-5.15098	-0.300508	-5.40435	-4.95936	-3.06518	-0.481159	0.505478	-3.61655	-2.60472	-5.681	-4.95608	-7.76364	-4.97475	-5.5438	-5.19662	-6.40767	-6.36516	-2.82963	-7.35998	-5.43069	-5.70116	-2.09898	-5.78698	-2.31438
PLK3	-1.15223	-1.44185	-4.76897	-3.22368	-1.54203	-7.89327	-0.541642	-1.70145	-0.342689	-0.728849	-1.24075	-2.01772	-3.05903	-4.61128	-0.946755	-1.6039	-1.54114	-4.30022	-5.69782	-1.47091	-1.47108	-1.40864	-1.38946	-1.57673	-1.86049	-1.45054	-4.54844	-0.944923	-3.34045	-2.17766	-0.653	-0.447525	-4.26863	-2.01976	-0.681005	-2.78615	-1.71925	0.234699	-1.00464	-5.19662	-0.792965	-0.0253069	-0.943804	-1.09319	-1.26077	-2.15684	-1.51402	-0.0865354	-1.10793
PMEPA1	0.381199	1.73607	1.29712	0.439289	-0.0681004	0.330733	-0.384953	0.959512	-0.0472327	0.581491	-0.4118	-0.00955055	0.753666	2.11664	-1.04191	-0.151663	0.511856	0.284739	1.26796	-1.14899	0.216975	0.918174	0.195504	-0.849745	-1.59745	-0.293	1.89451	1.21036	-0.391679	-1.23736	0.356831	0.251206	-0.754054	0.5038	0.640923	-0.513132	0.507823	0.0252457	0.983675	-0.44173	-0.0678248	1.2642	-1.10527	-0.465162	0.213163	-0.428144	0.873007	1.10784	-0.865077
PMM2	2.89446	0.936661	0.931467	-0.362383	0.24224	-0.753717	-0.920895	-0.655897	0.17516	1.39548	-1.59439	-0.499876	-1.30345	1.03258	-0.234558	-1.08503	-1.14835	0.454664	1.6685	1.22158	-2.31908	-0.523095	0.968094	0.0571455	-0.799944	1.89341	1.45156	1.99653	-1.45384	0.361081	-0.85094	-0.0548553	-0.307798	1.51422	0.566923	-0.14872	-2.47824	2.3651	0.500592	0.531303	0.984643	0.321344	-0.223912	0.628705	0.891234	-1.94627	0.684397	0.981209	0.342728
PNP	2.95299	-0.515852	0.874883	0.332957	1.8579	-0.220843	0.21836	0.366349	-1.4098	1.31379	-0.245242	-0.899727	0.979103	1.55865	-0.234558	-0.269109	0.207558	0.699776	1.5968	1.99319	-0.734116	1.244	1.17533	-0.0596682	-0.45061	2.38818	0.910996	0.824465	-0.00849499	1.10073	0.819154	0.652504	-0.00989275	1.81313	1.85038	-0.174715	-1.22448	1.81966	0.338841	1.62356	0.76225	0.403027	-0.153523	0.72217	2.19136	-0.810391	0.626846	0.981209	0.0404583
PNPLA4	-5.40016	-2.59385	-4.76897	-1.02204	-5.71196	0.477419	-1.43685	0.48472	-5.80212	-1.56535	-0.605887	-1.70897	0.160011	-4.61128	-1.64336	-1.08503	0.398742	-2.71526	-0.790929	-4.69331	-0.248689	-2.83185	-5.97442	-2.11278	-1.86049	-5.15098	-4.54844	-5.40435	-1.92123	-0.101709	0.605918	-0.783392	-1.37554	-5.60472	-5.681	-4.14872	-1.22448	-4.97475	-2.33435	-2.38926	-6.40767	-3.78019	-3.10527	-3.55262	-5.43069	-1.76256	-0.424379	-5.78698	-7.01482
POLR1C	0.789664	0.323684	2.16176	1.32476	0.9319	-0.220843	-2.24765	-0.427114	1.93935	0.649662	0.338222	0.148553	-0.0381064	0.912286	0.908047	-0.400083	-0.833918	0.606667	2.13507	0.435976	-0.553544	0.579086	0.215404	0.832079	-0.61473	1.79153	1.33421	1.00504	-0.33209	-0.101709	-0.653	-0.303311	0.589354	0.524558	0.873584	-1.31222	-0.112588	0.832601	-0.698312	0.710273	0.264751	-0.365157	-0.943804	0.01506	1.92686	-1.00072	-0.0312342	0.362772	0.452781
POLR3G	-5.40016	-1.44185	-4.76897	-3.22368	-2.54203	-1.12508	-0.541642	-0.655897	-5.80212	-1.56535	-1.59439	-2.38969	-0.537916	-4.61128	-2.33142	-1.31831	-2.0826	-5.30022	-3.11286	-6.27827	-2.31908	-1.40864	-5.97442	-6.43471	-6.98977	-5.15098	-3.54844	-2.597	-1.92123	-3.06518	-1.34545	-0.603644	-3.16909	-5.60472	-5.681	-6.95608	-4.17868	-1.97475	-3.63691	-5.19662	-6.40767	-6.36516	-7.35319	-7.35998	-5.43069	-8.28612	-2.09898	-5.78698	-7.01482
POU5F1	2.76976	1.08171	-0.309541	-0.362383	-2.01152	0.330733	-2.24765	-0.655897	-1.89523	1.05356	-0.949619	-1.06777	-0.870492	0.973687	-0.31152	-1.6039	-0.269134	-0.599784	0.0570677	0.0615801	-2.31908	0.651236	-2.38946	-0.653348	-1.59745	-1.06352	0.0954203	1.0875	-1.01183	-0.802149	-0.481159	1.2682	-1.26863	-0.604725	-1.77411	-0.78615	-2.47824	-0.515323	0.121534	-1.49618	-1.01536	-1.84159	-1.73849	-1.09319	-0.523803	-4.19866	0.400254	-1.08654	-1.23346
PPAN	1.53058	0.759783	2.14989	-0.193929	0.497497	-1.12508	-1.7831	-0.927927	-0.994765	-0.124778	-1.81678	-1.24834	-0.537916	-0.151844	-1.33142	-1.96033	-1.33142	-0.656368	-0.174258	-0.0303424	-2.31908	-0.523095	0.417897	-0.734268	-3.08288	1.13442	2.16581	1.30989	-1.74435	-0.672866	-1.07711	-1.85518	0.227799	-0.112872	1.51867	-0.978795	-1.71925	1.5171	0.269979	1.44724	-0.884113	-0.610269	-1.49521	-1.02013	1.06116	-2.67141	-0.799418	0.342308	0.00754369
PPAT	-1.00784	-1.85689	1.69046	-1.73825	0.857899	-0.111909	-1.15404	-1.70145	-2.48019	2.43465	-2.40175	-2.38969	-0.870492	0.55865	-1.33142	-2.42206	-0.985921	-0.25583	-3.11286	0.489914	-1.47108	-0.898962	-0.0675303	-0.434708	-2.59745	1.29196	2.33421	0.087499	-2.90874	-0.566933	-1.07711	0.579956	-0.828054	0.752827	0.151885	-0.123185	-4.17868	1.15453	-2.11754	0.993207	-0.525032	-1.50718	-1.62527	0.194609	1.21316	-2.37923	-0.532632	0.235393	-0.674974
PPP1R13L	-0.815198	-0.515852	-0.125117	-1.33615	-0.0972468	-0.220843	-1.7831	-1.26345	0.367805	-0.565351	-1.08786	-0.625407	-0.265123	1.19608	-3.69399	-1.6039	-0.833918	-1.49287	-0.790929	-1.32407	-1.83365	0.021604	-0.804496	-0.368618	-1.98977	-0.396094	-4.54844	0.502536	-1.45384	-1.89526	-0.481159	-0.783392	0.0737652	-1.21241	-1.59354	-4.14872	-1.71925	0.234699	-0.0439561	-5.19662	-0.320212	0.321344	-1.73849	-1.02013	0.891234	-1.59962	0.200582	-0.0320876	-2.31438
PROCR	0.50673	-1.44185	-4.76897	0.0934347	-1.46403	-1.35411	-0.384953	-0.927927	-1.21716	-0.243423	-1.08786	-2.01772	-1.9335	-4.61128	-1.85749	-1.96033	-1.33142	-5.30022	-1.89046	-2.69331	-1.47108	-0.898962	-1.72649	-0.849745	-2.18241	-2.34363	-4.54844	-0.649467	-1.45384	-3.06518	-0.481159	-1.22197	-2.32109	-0.904285	-4.681	-1.63415	-7.76364	-0.219867	-1.00464	0.357972	-1.32021	-3.19523	-4.54584	-3.03805	-5.43069	-2.67141	-1.75502	-2.20201	-7.01482
PRR15	1.07557	-4.17882	-4.76897	-6.5456	-5.71196	-1.93907	-2.24765	-1.26345	-5.80212	-5.37271	-1.59439	-2.89219	-3.05903	-2.61128	-3.69399	-3.12567	-2.98592	-5.30022	-5.69782	-6.27827	-1.47108	-2.83185	0.968094	-6.43471	-6.98977	-5.15098	-4.54844	-5.40435	-3.34045	-5.80215	-0.85094	-1.50027	-2.32109	-5.60472	-5.681	-6.95608	-4.17868	-4.97475	-4.22187	-5.19662	-6.40767	-2.5578	-7.35319	-7.35998	-5.43069	-3.53124	-1.51402	-1.26341	-7.01482
PTEN	2.38774	1.22491	2.50715	-6.5456	0.714308	0.172821	-2.92411	-2.33344	0.827236	1.52211	-1.81678	-1.46593	-3.05903	3.82752	-2.10903	-2.42206	-0.985921	-1.21276	1.73681	2.23348	-2.31908	-0.691366	2.94444	0.150255	0.0763202	2.47838	3.80471	2.303	-1.33209	-0.456374	-0.653	0.157033	0.263868	1.29009	0.948352	0.583084	-1.71925	2.4431	1.42774	3.06077	1.50521	1.59485	1.87081	0.943801	1.83609	-1.59962	1.29861	2.60534	2.68735
PTGDS	-5.40016	-2.59385	-4.76897	-2.29768	-5.71196	-1.12508	-2.92411	-0.927927	-5.80212	-5.37271	-1.81678	-3.72227	-0.537916	-4.61128	-6.50134	-1.31831	-2.47402	-5.30022	-3.11286	-3.27827	-4.64101	-7.29128	-5.97442	-6.43471	-6.98977	-5.15098	-4.54844	-2.597	-1.10851	-2.57976	-1.07711	-0.447525	-3.16909	-5.60472	-5.681	-6.95608	-7.76364	-4.97475	-3.15148	-2.38926	-6.40767	-6.36516	-5.03127	-7.35998	-5.43069	-8.28612	-2.99206	-5.78698	-6.01482
PTH	-5.40016	-5.76378	-4.76897	-1.73825	-5.71196	-1.93907	-1.7831	-0.427114	-5.80212	-5.37271	-3.36222	-2.89219	-3.05903	-4.61128	-3.17942	-1.08503	-2.98592	-5.30022	-5.69782	-6.27827	-0.940567	-4.12135	-5.97442	-6.43471	-6.98977	-5.15098	-4.54844	-5.40435	-1.59679	-2.57976	-0.188868	-1.22197	-3.16909	-5.60472	-5.681	-6.95608	-7.76364	-4.97475	-3.63691	-5.19662	-6.40767	-6.36516	-7.35319	-7.35998	-5.43069	-8.28612	-6.79942	-5.78698	-7.01482
PTTG1	2.0261	1.90865	3.81223	0.332957	2.58266	0.330733	0.56545	0.876239	1.28534	0.212257	-0.16653	0.0697384	0.626922	2.03258	0.698328	-0.400083	0.138774	2.59459	2.36827	0.291586	0.00284971	0.719948	1.78047	0.974683	0.149782	3.24562	3.1169	2.1348	-0.00849499	0.624116	0.527572	1.02062	0.806661	2.45597	2.3469	0.183476	0.740186	2.96776	-0.510379	2.34254	0.569605	-0.810568	-1.28711	0.115754	1.78847	-0.367261	-0.214456	-0.202013	-0.300579
PVRIG	-0.190707	0.759783	0.552955	0.875058	-0.319639	0.841441	1.23432	0.366349	0.767735	0.212257	0.491724	-0.0977777	-0.0381064	-0.44135	0.280016	0.15656	0.763017	-1.1303	1.26796	0.911555	1.08691	1.33808	0.417897	0.372647	-1.37506	-0.343626	1.17948	1.1655	-0.0559118	0.112734	1.49177	1.2682	0.113843	-0.4348	-0.774114	-0.708148	-0.320697	-0.887291	0.473006	-0.874689	0.115887	-0.458266	-0.798606	-0.283164	-0.145291	0.332261	0.119445	-0.295122	1.00198
PYCRL	-1.15223	-0.304348	0.36031	-0.773015	0.24224	0.172821	-1.7831	-0.427114	-0.18741	-0.728849	-0.16653	-2.01772	0.160011	-0.289347	-0.31152	-0.269109	-0.00948993	-3.30022	0.410705	-1.81884	-0.734116	-0.372416	-0.514989	-1.57673	-1.59745	-1.24409	-0.641545	-0.082426	-1.10851	-0.187439	0.0540637	0.719932	-1.16909	-0.560331	-0.0662948	-0.868612	-0.320697	-0.274315	-0.510379	-0.44173	-3.60032	-6.36516	-2.06779	-1.52709	-2.43069	-1.94627	-1.30757	-0.429423	-1.06063
QPRT	-2.8152	-2.59385	-4.76897	-0.553138	-0.624494	0.40594	0.00662595	0.238809	-1.89523	1.75658	-0.605887	-1.70897	0.160011	-0.803921	-0.45695	-0.040632	0.565253	0.677056	-1.23839	2.53551	-0.248689	-0.898962	0.254398	-0.734268	-1.49792	1.92583	-1.089	1.88105	-0.215971	-0.802149	0.527572	0.424925	-1.9467	0.176635	-2.22157	-1.52981	-1.22448	0.273173	-0.44577	2.9275	-0.707235	1.89694	1.21666	-0.477336	-0.572713	-0.367261	0.731963	1.49843	0.342728
RAB11FIP4	0.789664	0.323684	-4.76897	-0.0431041	-1.12699	-1.60787	0.312928	0.0988923	-2.48019	-0.980388	-0.16653	-1.06777	-0.537916	-2.61128	-0.643363	-0.269109	0.275999	-2.30022	-0.790929	-2.19081	0.00284971	0.232283	-3.65249	-2.11278	-1.10713	-5.15098	-0.741081	-0.404354	-0.0559118	-0.566933	0.0540637	0.579956	-0.828054	-1.79737	-0.87365	-1.95608	-2.47824	-0.582437	-0.394055	-0.44173	-4.40767	-2.04323	-1.96088	-1.68755	-0.730254	-0.810391	-0.649671	-4.20201	-1.52297
RAB26	-1.94073	-1.85689	-4.76897	-1.02204	-5.71196	-1.93907	-1.7831	-0.229694	-2.80212	-3.37271	-3.36222	-1.46593	-0.537916	-2.61128	-6.50134	-0.879912	-0.36577	-3.71526	-5.69782	-4.69331	-2.31908	-1.40864	0.610542	-2.43471	-6.98977	-1.98106	-4.54844	-0.760498	-2.59679	-3.06518	-0.653	-0.175272	-7.07598	-5.60472	-5.681	-6.95608	-4.17868	-4.97475	-0.929092	-1.49618	-6.40767	-3.5578	-1.68077	-7.35998	-5.43069	-3.53124	-0.532632	-2.08654	-5.01482
RAI2	-5.40016	-5.76378	-4.76897	-0.773015	-5.71196	-1.93907	-1.43685	0.238809	-5.80212	-0.565351	-1.24075	-2.89219	-1.30345	-4.61128	-2.33142	-4.55451	-0.985921	-2.30022	-5.69782	-6.27827	-0.393079	-2.20382	-4.38946	-6.43471	-2.18241	-5.15098	-4.54844	-1.31689	-1.59679	-1.08333	0.163135	-0.175272	-7.07598	-5.60472	-5.681	-3.49664	-1.22448	-4.97475	-1.78891	-1.49618	-4.40767	-6.36516	-2.06779	-3.77502	-5.43069	-2.15684	-0.799418	-5.78698	-1.88554
RAMP1	-1.94073	-4.17882	0.137918	-0.362383	-5.71196	-1.60787	-1.15404	-0.427114	-2.21716	-5.37271	-1.24075	-0.756057	-0.265123	-4.61128	-1.04191	-0.879912	-0.833918	-2.71526	-5.69782	-6.27827	-0.940567	-4.12135	-5.97442	-2.43471	-2.59745	-5.15098	-4.54844	-5.40435	-1.74435	-3.06518	-2.71601	-0.303311	-5.49102	-2.14529	-5.681	-1.78615	-1.71925	-4.97475	-1.10086	-5.19662	-4.40767	-1.19523	-4.54584	-4.55262	-5.43069	-2.37923	-2.09898	-5.78698	-6.01482
RARA	-0.645273	-1.44185	-0.447045	-1.73825	-1.46403	-0.45864	-1.43685	-0.427114	-0.847924	0.649662	-1.08786	-1.06777	-0.537916	1.47619	-1.33142	-1.31831	-0.833918	-0.170941	-0.174258	-1.23388	-1.47108	-1.73669	-0.450859	-0.368618	-1.49792	-0.829053	-1.089	1.05508	-1.74435	0.182744	-0.85094	-0.983393	-1.49102	-1.21241	-2.09604	-6.95608	-1.71925	-0.887291	-1.00464	1.44724	-2.15975	0.824668	-1.20345	-0.465162	-1.97126	-1.59962	-1.51402	-1.88008	-2.06063
RARRES1	-5.40016	-4.17882	2.29712	-1.33615	2.9101	-1.93907	-1.7831	-0.927927	1.3064	-3.37271	-1.4118	-2.01772	-0.537916	-1.28935	-1.45695	-4.55451	-0.985921	-0.840792	-1.23839	-0.233876	0.973703	-2.20382	-0.219533	4.19738	1.7751	2.23272	-4.54844	-1.81939	-1.92123	-1.43292	-2.71601	-0.983393	0.152837	2.20263	4.96195	-0.868612	-4.17868	5.31526	-3.63691	-1.49618	2.48411	0.577358	4.57199	2.15966	0.213163	-2.15684	0.626846	-2.78698	2.5795
RARRES2	-2.8152	-4.17882	-2.76897	0.875058	1.00229	0.172821	-2.24765	0.0988923	3.0276	2.73058	0.229229	-0.187137	0.160011	1.67413	0.128012	0.754877	-0.00948993	0.699776	0.410705	0.652467	0.00284971	0.021604	2.13932	1.72011	0.765118	0.576939	0.661017	-1.49746	0.213421	0.996593	-0.481159	-0.0548553	-0.600249	-0.475442	1.08718	-0.0135606	0.0692499	-0.167399	0.163557	0.993207	1.32703	2.39639	-0.422458	1.01506	2.20593	0.332261	2.56909	1.43219	0.562605
RASL10A	-5.40016	-1.44185	-4.76897	-2.29768	-5.71196	-1.93907	-1.7831	-0.427114	-5.80212	-5.37271	-1.81678	-2.89219	-0.537916	-4.61128	-1.85749	-1.6039	-2.0826	-5.30022	-5.69782	-6.27827	-1.18157	-7.29128	-5.97442	-3.62735	-3.98977	-5.15098	-4.54844	-1.81939	-2.10851	-3.06518	-0.653	-1.22197	-3.16909	-4.60472	-5.681	-6.95608	-2.47824	-4.97475	-4.22187	-5.19662	-6.40767	-6.36516	-7.35319	-7.35998	-5.43069	-2.67141	-6.79942	-5.78698	-7.01482
RBMS1	1.50673	2.03064	2.51643	1.62432	1.94625	1.997	0.968106	0.69372	2.80151	2.0949	1.41559	0.646965	1.34572	3.96237	2.12801	2.06641	-0.00948993	2.79781	2.98517	0.604373	0.716546	2.14959	2.58782	2.9338	1.14466	1.09695	4.77799	3.00504	2.76466	2.02652	1.26845	0.34175	1.44365	1.78759	1.08718	1.5714	1.5447	2.81966	1.50332	2.96325	1.71127	1.18174	0.612589	1.1753	2.51182	0.410843	3.03821	1.82036	2.14757
REEP1	-5.40016	-0.304348	-4.76897	-1.33615	-5.71196	-1.60787	-1.43685	-0.655897	-5.80212	-1.56535	-2.40175	-2.89219	-0.870492	-4.61128	-2.69399	-1.31831	-1.78661	-5.30022	-5.69782	-4.69331	-0.940567	-0.372416	-2.27398	-4.43471	-1.59745	-2.15098	-4.54844	-5.40435	-3.90874	-1.63222	-0.85094	-0.0548553	-2.55242	-3.01976	-5.681	-6.95608	-2.47824	-4.97475	-0.929092	-5.19662	-6.40767	-2.66472	-7.35319	-7.35998	-5.43069	-3.53124	-2.99206	-5.78698	-7.01482
RHOB	0.50673	-1.06334	-0.245411	0.875058	-3.39003	-0.220843	-1.7831	-1.26345	0.10477	2.0949	-0.830204	0.594306	-1.9335	-0.026313	-0.719984	-1.6039	-0.469346	1.51995	1.07036	-0.470915	-1.18157	-1.73669	3.24958	0.194649	-1.86049	0.241336	-1.96347	1.39006	-0.914969	0.242245	-1.67537	-1.85518	0.113843	-1.14529	-5.681	-3.78615	-0.563968	-1.65283	2.97682	-0.874689	0.00171614	2.13469	0.170367	-1.96766	0.241732	0.518006	-0.214456	2.62242	-0.657272
RNASE4	2.36802	-1.44185	-0.309541	-1.73825	-2.39003	-0.598648	-2.24765	-2.33344	-0.247531	0.984846	-2.07982	-2.89219	-0.537916	0.388725	-2.33142	-4.55451	-1.78661	0.699776	-3.11286	-0.395627	-3.05604	0.41608	-0.330565	-2.11278	-1.59745	-0.903054	-1.54844	-1.31689	-1.59679	-0.92768	-0.481159	0.157033	-1.07598	-0.517262	-1.22157	-6.95608	-4.17868	-2.65283	0.00309248	0.869472	-0.707235	-0.750447	-1.4463	-1.42924	-1.10877	-1.33193	0.457969	-0.832779	-0.748038
RNF13	1.07557	1.2915	4.10447	-0.362383	1.44791	0.256479	-0.541642	-0.655897	0.263969	0.856113	-1.08786	-0.389693	0.160011	2.08916	-1.45695	-1.6039	-0.469346	1.38628	-0.174258	0.321643	-0.117445	0.79087	1.62549	-0.576727	-1.10713	2.11581	2.61144	0.502536	-0.453835	0.306375	-0.327624	0.424925	-1.16909	1.45056	1.91145	0.55172	-1.71925	2.12328	0.269979	1.22965	0.840253	0.321344	0.401693	0.689869	2.10847	-0.367261	-0.126993	1.22425	1.53976
RPLP0	7.00259	7.5284	8.02544	2.84957	6.24515	3.84778	0.00662595	-0.0560662	5.05974	5.75206	2.50046	3.78318	1.49914	7.70019	5.12117	-0.040632	1.68441	6.27579	6.45002	6.20857	3.2594	4.66401	5.96295	3.86221	3.43964	6.92182	8.1385	6.46292	1.99234	4.41742	-0.481159	2.70503	4.51741	6.39879	6.21608	5.88293	4.05254	7.31065	5.1575	6.28266	6.33295	5.21793	5.9206	4.95205	6.85846	2.41345	5.18927	6.21689	5.18086
RRM2	2.7445	-0.119923	4.14691	-0.0431041	3.19193	-0.598648	-0.241618	-0.229694	-2.80212	2.75142	-0.505582	-1.46593	-0.265123	3.96237	-1.45695	-1.08503	-0.00948993	1.0217	2.13507	1.41522	-0.117445	-0.372416	3.1497	-0.368618	0.19014	2.65637	3.17266	2.49651	-0.523544	0.306375	0.263231	-0.303311	-0.157119	3.1232	1.81085	0.883129	-0.85675	3.48468	0.919722	3.64259	-0.198221	0.577358	-0.723838	1.29823	2.68825	-2.15684	-0.307565	0.752184	0.740063
RRS1	3.64696	3.44079	1.55296	1.1502	3.40179	0.786212	-1.7831	-1.26345	1.5288	1.97602	-1.24075	-1.06777	-1.9335	2.41109	1.42939	-0.700362	-1.14835	2.41402	3.16637	2.50963	-0.393079	1.0881	2.71208	1.61514	0.855721	2.34087	4.15892	1.35053	-0.74435	1.46151	-2.71601	0.251206	1.58223	2.44512	1.51867	-0.174715	0.740186	2.88323	0.722985	2.53809	1.16975	-1.04323	0.663613	0.36112	3.21316	-2.67141	1.93529	2.70086	0.0619915
SATB2	0.577119	-5.76378	-4.76897	-1.02204	-3.39003	-0.331026	-2.24765	-1.26345	-4.21716	-1.20278	-2.81678	-2.89219	-0.265123	0.912286	-1.85749	-0.879912	-1.33142	0.889601	-0.449892	-2.69331	-0.940567	-0.523095	-5.97442	-3.11278	-2.18241	-5.15098	-4.54844	-2.597	-1.45384	-1.08333	-0.481159	-0.783392	-1.61655	-5.60472	-5.681	-2.20119	-7.76364	-4.97475	-1.95884	0.531303	-6.40767	-4.36516	-5.76823	-2.65954	-5.43069	-3.0382	-2.99206	-2.46505	-7.01482
SC5DL	-3.8152	-5.76378	-4.76897	-1.02204	-5.71196	-0.331026	-0.920895	-0.927927	-2.80212	-5.37271	-1.08786	-1.70897	0.160011	-3.61128	-2.69399	-0.400083	-0.70189	-5.30022	-5.69782	-1.81884	-0.940567	-0.372416	-0.689019	-2.43471	-1.70437	-3.15098	-0.378511	-2.597	-1.21213	-1.63222	-0.653	0.157033	-1.16909	-1.69783	-5.681	-2.95608	-0.85675	-4.97475	-1.78891	-5.19662	-4.82271	-2.36516	-2.54584	-3.35998	-5.43069	-4.19866	-1.09898	-5.78698	-1.3424
SCUBE2	-5.40016	-1.06334	-4.76897	-0.553138	-5.71196	-1.93907	-1.15404	-0.427114	-5.80212	1.85611	-0.949619	-1.46593	-1.9335	-4.61128	-4.91638	-1.08503	-1.14835	-5.30022	-5.69782	-2.95634	-1.18157	-1.73669	-5.97442	-6.43471	-4.98977	-3.56602	-4.54844	-2.597	-2.10851	-3.06518	-0.653	-0.447525	-2.55242	-5.60472	-5.681	-6.95608	-4.17868	-4.97475	-2.33435	-5.19662	-4.40767	-4.04323	-3.10527	-4.19005	-4.43069	-2.15684	-0.941437	-2.61705	-6.01482
SEPT11	1.78966	-1.44185	2.61473	-0.553138	2.57345	-0.45864	-2.24765	-0.427114	1.70567	2.56393	-1.4118	-1.46593	-3.05903	2.55865	0.381299	-0.879912	-0.580938	1.98518	1.91689	1.12261	-1.83365	-0.101454	1.84576	0.914021	0.043654	2.59721	3.67557	1.53816	-1.74435	0.921227	-0.653	0.157033	-0.536823	2.24702	1.03324	1.15245	-2.47824	2.13377	0.473006	2.53809	1.19966	1.00988	-0.153523	1.06209	2.82197	-1.00072	1.89058	2.22983	1.5436
SERPINE1	-1.94073	-1.44185	-0.599048	-3.22368	0.516862	0.0840116	-1.7831	-0.0560662	1.70567	1.71476	-1.4118	-3.72227	-0.0381064	5.256	-1.64336	-4.55451	-1.54114	-0.25583	1.80203	2.48328	-2.31908	-0.372416	3.90975	-0.0596682	-1.70437	2.41887	2.24598	3.14639	-1.21213	-0.187439	-0.653	-0.303311	-1.9467	-0.112872	0.918908	-0.24183	-1.22448	1.87074	3.0663	1.12531	3.29276	2.87086	0.728954	2.14186	2.09287	-1.46595	3.32729	2.7405	1.17993
SERPINF1	2.10763	-0.304348	2.49781	-0.193929	2.39657	-1.60787	-1.7831	-0.927927	2.55982	3.69338	-0.4118	-1.06777	-0.537916	3.18314	1.24012	-1.6039	-1.78661	2.15099	-0.449892	1.64654	-0.553544	-0.898962	3.47885	1.5821	1.2294	2.74989	4.75306	1.30989	-1.45384	0.242245	-1.34545	-1.22197	1.47476	1.62409	3.07054	2.43409	-4.17868	1.50098	1.1462	1.93267	2.95427	2.80226	-0.105267	1.80241	3.36697	0.0758191	2.9336	3.4938	3.15385
SERTAD2	0.577119	1.08171	1.64042	0.332957	0.960469	0.0840116	-0.113081	-0.427114	-0.0472327	1.56981	-0.16653	-0.187137	0.626922	3.47619	0.331546	0.331889	0.763017	1.57014	0.0570677	1.26089	0.716546	1.03515	1.86478	-0.50397	-0.289329	0.372581	2.94342	1.7352	-0.159388	0.884351	0.883478	0.652504	0.113843	1.29009	1.01944	0.723405	-0.320697	1.5171	0.722985	1.62356	0.636719	0.774394	0.841562	1.43118	1.62459	-0.723882	1.51346	1.50765	1.14505
SFRP1	-5.40016	2.03064	5.14541	-1.33615	-2.9046	0.732441	-1.15404	-1.70145	3.83269	1.05356	-1.81678	-0.282399	-1.30345	-4.61128	-1.64336	-1.31831	-0.833918	3.84698	2.77386	4.12687	0.973703	-0.523095	-1.11644	-0.849745	-1.86049	4.46373	3.27811	-5.40435	-1.33209	2.3761	-1.34545	-0.175272	0.152837	3.36969	2.65885	2.62513	-0.112588	1.81966	-0.230919	-0.874689	4.28842	-4.78019	3.97099	3.42466	2.8314	-1.94627	6.99753	-0.832779	3.70114
SFRP4	-1.94073	-0.763779	-2.44704	0.332957	0.680361	-1.12508	-1.43685	-3.48451	1.84174	3.22348	-0.16653	-0.899727	-1.9335	0.476187	-1.04191	-0.879912	-0.70189	0.8083	0.0570677	1.36559	0.113881	-0.22519	1.49318	1.19465	0.940968	-0.244091	-0.963473	0.453627	-0.591793	0.112734	-0.85094	-0.175272	-2.32109	0.717203	-0.323453	0.785392	-2.47824	-4.97475	1.96399	2.17842	2.51119	2.92256	-0.265732	0.864022	2.20593	0.935462	3.81621	2.58371	2.24492
SGK1	-5.40016	-5.76378	-4.76897	-1.02204	-5.71196	-1.60787	-0.541642	-0.927927	-5.80212	-5.37271	-1.81678	-2.38969	-0.870492	-4.61128	-2.33142	-1.31831	-1.14835	-5.30022	-1.23839	-6.27827	-1.47108	-4.12135	-5.97442	-1.91115	-3.53034	-5.15098	-4.54844	-5.40435	-1.10851	-2.57976	-0.481159	-0.983393	-3.61655	-5.60472	-5.681	-6.95608	-4.17868	-4.97475	-3.15148	-5.19662	-6.40767	-6.36516	-7.35319	-4.55262	-5.43069	-2.67141	-6.79942	-5.78698	-7.01482
SH2B3	-0.54218	-1.44185	0.552955	-0.773015	-0.75776	-1.12508	-1.15404	-0.229694	-1.55419	0.212257	-0.605887	-1.46593	-0.870492	0.196079	-0.946755	-1.31831	-0.580938	-1.21276	-1.89046	0.321643	-1.18157	-2.20382	-0.514989	-2.73427	-2.34591	-0.627419	0.910996	-0.0120367	-1.59679	-0.92768	0.0540637	-0.983393	-2.32109	-0.697834	0.201638	-0.933707	-4.17868	-1.27431	-1.63691	0.125311	-0.707235	-0.664717	-0.753282	-1.13116	-0.907132	-3.0382	-0.649671	0.0203799	-0.259937
SIDT1	-5.40016	-5.76378	-4.76897	-1.33615	-5.71196	-2.98638	-2.92411	-0.427114	-5.80212	-3.37271	-1.4118	-2.01772	-0.870492	-4.61128	-3.17942	-1.96033	-0.580938	-5.30022	-5.69782	-1.14899	-1.18157	-1.40864	-2.27398	-2.73427	-3.53034	-5.15098	-4.54844	2.23227	-2.10851	-3.92768	-1.67537	-0.983393	-4.26863	-5.60472	-5.681	-6.95608	-7.76364	-4.97475	-1.95884	-5.19662	-6.40767	-1.90573	-5.76823	-5.03805	-5.43069	-1.76256	-3.99206	-2.78698	-3.6929
SKIL	3.09169	1.82118	3.83465	0.0934347	2.04959	0.256479	-0.241618	0.366349	2.08662	2.15086	-0.328497	0.536864	-0.537916	4.70387	0.0836183	-1.08503	0.456408	2.17551	1.5968	1.87148	-1.18157	0.579086	2.98268	0.531077	0.314012	2.64992	3.50141	1.88105	-1.01183	0.0475166	-0.188868	0.579956	0.227799	2.50902	2.35242	1.48687	0.84369	2.88943	1.91972	2.23801	3.09615	2.29662	1.1937	2.67619	2.24173	-0.498222	1.08322	2.4938	1.89207
SLC16A1	0.749587	0.323684	1.2534	-0.193929	2.0694	0.0840116	-0.920895	0.48472	-1.4098	0.649662	-0.71369	-0.389693	0.626922	0.636652	-0.109027	-0.151663	0.275999	0.630513	-1.23839	-1.14899	0.00284971	-0.101454	-2.06753	-0.734268	-1.18241	0.576939	1.56009	0.453627	-0.453835	-0.101709	1.00411	0.34175	-0.361736	-0.0197623	1.16449	-2.09809	-1.71925	1.6691	-1.95884	0.531303	-1.15975	-3.78019	-1.73849	-1.29389	2.29723	-1.0963	-0.214456	-2.08654	-1.55539
SLC16A3	2.20717	1.41613	0.137918	2.68722	2.00914	3.40537	0.712513	-0.427114	4.07746	2.24935	2.58188	0.69777	0.487962	3.80235	1.9865	1.12875	1.26341	1.51995	1.17254	0.245292	0.850847	0.975508	0.767046	2.66595	2.07093	1.32475	-0.548436	3.77555	2.05106	0.921227	0.751828	-1.22197	2.18376	0.524558	1.06046	0.478553	-0.112588	3.62516	-0.510379	1.22965	0.569605	0.938624	-0.398999	0.887948	0.926858	-0.810391	1.45797	1.16722	-0.865077
SLC17A3	-5.40016	-5.76378	-4.76897	-1.33615	-5.71196	-1.60787	-1.15404	-0.655897	-5.80212	-5.37271	-1.59439	-3.72227	-0.537916	-4.61128	-3.17942	-0.879912	-1.78661	-5.30022	-5.69782	-6.27827	-3.05604	-2.83185	-5.97442	-6.43471	-3.98977	-5.15098	-4.54844	-5.40435	-1.92123	-1.89526	-2.10383	-0.983393	-4.26863	-5.60472	-5.681	-6.95608	-7.76364	-4.97475	-5.5438	-5.19662	-6.40767	-6.36516	-7.35319	-7.35998	-5.43069	-4.19866	-6.79942	-5.78698	-7.01482
SLC1A5	2.14673	4.45175	-1.18401	6.32129	0.310411	3.93209	2.00663	3.59605	2.61151	2.80222	3.18905	4.40701	0.753666	1.38872	4.11245	3.59093	1.97	3.29597	1.80203	2.05265	2.25381	2.62907	2.09167	4.02472	1.78831	2.93648	3.68997	3.50554	3.52388	1.7928	2.75764	1.22127	4.18846	1.7616	1.08718	0.21385	1.119	2.04761	0.500592	1.44724	1.45651	1.57736	0.941426	0.753763	1.88219	0.911092	1.03979	2.0332	0.279797
SLC25A18	-5.40016	-5.76378	-4.76897	-1.33615	-5.71196	-2.36971	-1.43685	-0.0560662	-4.21716	-1.91327	-1.81678	-0.756057	-1.9335	-4.61128	-1.85749	-1.08503	-1.33142	-5.30022	-5.69782	-6.27827	-2.31908	-1.12135	-5.97442	-3.62735	-3.53034	-5.15098	-4.54844	-4.40435	-1.33209	-1.43292	-1.07711	-0.783392	-2.55242	-5.60472	-5.681	-6.95608	-4.17868	-4.97475	-1.10086	-5.19662	-6.40767	-6.36516	-5.03127	-7.35998	-5.43069	-2.67141	-1.51402	-3.78698	-7.01482
SLC29A1	2.1697	3.55137	2.49781	2.79127	1.43779	0.841441	0.21836	0.69372	4.85877	2.78211	-0.16653	1.85935	0.626922	1.47619	1.8606	-0.269109	-0.469346	2.92378	4.12076	1.59825	1.08691	1.14335	2.7535	1.39184	0.898974	3.26265	2.21975	2.1348	0.370273	1.29237	-0.188868	0.505478	0.678906	1.53483	1.28478	-0.464222	-0.320697	2.88323	1.08919	3.31514	1.56387	1.14264	-0.798606	1.70611	3.56083	-1.76256	1.36045	1.53495	1.41144
SLC39A6	-5.40016	-0.119923	0.51643	-1.73825	0.194934	-0.220843	-0.113081	-0.229694	-0.847924	0.735819	0.107809	-2.38969	0.160011	0.781042	-1.04191	-1.08503	-0.0897573	0.343632	0.711571	-1.63441	-0.940567	-1.12135	0.683791	-1.57673	-1.37506	0.372581	1.8266	-0.194901	-1.21213	0.112734	-0.653	0.34175	-3.16909	1.4065	-1.09604	-0.581036	-1.71925	0.832601	-0.44577	1.5313	-0.679754	-0.905725	-0.398999	-0.465162	0.376661	-1.00072	-0.649671	-0.0590546	-2.20747
SLC4A7	0.45782	0.759783	2.51643	-0.773015	1.04293	-0.45864	-1.7831	-0.229694	0.263969	-1.91327	-1.59439	-0.282399	-0.265123	0.388725	-1.17942	-1.96033	-0.833918	0.606667	0.841339	1.09677	-0.940567	-0.22519	1.36543	-1.43471	-2.59745	1.59049	1.8266	-0.275071	-1.59679	-0.92768	-0.062295	0.579956	-1.07598	0.680677	0.42752	-0.513132	-0.85675	1.5644	0.0855546	0.869472	0.162181	0.204699	-1.82963	-0.200108	0.656769	-1.59962	1.03979	0.63929	0.279797
SMAD1	-1.00784	-1.06334	-0.0140852	-1.73825	-1.01152	-1.35411	-0.241618	0.0988923	-0.672837	-0.418509	-2.07982	-0.899727	0.160011	1.47619	-1.85749	-0.879912	-1.54114	-0.907907	-1.23839	-1.14899	-0.734116	0.323431	0.669435	-0.368618	-2.81984	1.1528	1.09542	-1.08243	-1.10851	-0.456374	0.444726	-0.175272	-0.600249	0.253256	-0.0371485	-1.78615	-4.17868	-0.804829	-2.5438	-2.38926	-2.01536	-0.0253069	-0.861342	-1.74527	-0.786837	-1.94627	-0.424379	-0.577522	-1.88554
SMAD2	2.45159	5.3177	2.59735	1.83233	1.34333	-0.111909	0.115591	-0.655897	2.5902	0.984846	0.391225	0.148553	-0.0381064	1.81499	0.128012	-1.31831	0.763017	2.32913	1.73681	0.979118	0.644396	2.06847	1.59543	0.859913	0.286355	1.44893	3.70895	1.68311	0.543895	2.33228	-0.188868	0.719932	0.617505	1.98773	0.676547	1.55962	-1.71925	0.697671	0.963993	1.5313	0.669141	0.429259	0.340292	1.95063	2.20593	-1.59962	2.1921	0.871236	0.733369
SMAD3	1.67666	-0.763779	0.754589	-1.73825	-2.9046	-1.35411	-0.384953	-2.33344	-0.847924	-0.124778	-2.40175	-2.38969	-0.537916	3.52828	-2.10903	-1.08503	-8.74081	-0.442243	0.410705	-2.19081	0.00284971	0.579086	-0.0436835	-2.11278	-2.18241	-1.56602	0.809116	-0.649467	-1.45384	-1.89526	-0.327624	0.579956	-2.55242	0.5038	-1.51108	-1.20119	-0.85675	-1.27431	-0.636911	0.710273	-1.12227	-0.972839	-2.65276	-2.03805	0.451949	-2.37923	-0.307565	-1.20201	0.0512651
SMAD4	2.06744	3.7637	2.86765	0.332957	1.58266	0.172821	-0.717446	0.238809	2.34254	1.68258	0.28631	0.536864	-0.537916	2.29562	-0.31152	-1.6039	-0.269134	2.46796	1.5968	1.41522	0.113881	1.86354	1.29237	1.26573	-0.61473	2.73166	4.22305	1.1655	-0.914969	1.2016	-0.653	0.505478	0.678906	2.60473	1.38508	1.66963	0.230713	1.79343	1.04866	3.17842	1.07614	0.442198	0.750093	1.39156	2.36372	-0.498222	2.22572	1.47981	0.562605
SMAD5	1.85723	0.936661	2.69046	-1.33615	0.477868	-0.927484	-1.43685	-0.927927	-0.409803	0.649662	-0.830204	-1.46593	-1.9335	0.912286	-2.33142	-4.55451	-1.78661	0.507131	1.17254	0.901639	-4.64101	-2.20382	0.175326	-1.91115	-1.37506	0.893413	1.62149	0.150235	-1.92123	-0.364744	-0.85094	-1.85518	-1.61655	-0.0197623	0.100355	-1.25564	-1.22448	1.62516	-0.0843704	1.22965	-0.679754	0.249553	-1.10527	-1.13116	0.269746	-1.46595	-0.307565	0.534953	-0.491262
SMAD7	1.34131	3.20489	0.0383822	-0.193929	-0.0681004	-0.331026	-0.241618	0.366349	0.870305	0.735819	-0.328497	-0.0977777	0.160011	1.94331	-0.109027	0.15656	-0.833918	0.765865	0.960392	0.911555	1.33627	0.719948	1.14452	-0.28496	-1.18241	0.492875	2.75534	1.88105	-0.668686	0.996593	0.163135	0.785923	0.0737652	1.03913	0.0194351	1.46178	-0.320697	0.806605	0.197665	2.66757	0.264751	0.442198	1.44447	0.864022	-0.260769	-1.20931	2.03979	0.479811	0.242564
SMOX	0.847767	0.850931	-1.44704	-0.773015	0.218781	0.330733	-0.541642	0.48472	-1.71466	1.78717	-0.328497	-1.06777	-0.0381064	-0.44135	-0.372061	-0.544145	0.565253	0.606667	1.35746	0.489914	0.216975	-0.691366	-2.16707	-0.734268	-2.34591	0.893413	-0.156118	0.150235	-0.00849499	-0.802149	0.444726	0.719932	0.299057	1.18969	-0.221573	-1.40149	-1.22448	0.0252457	0.82252	1.34254	-0.122273	-1.0076	-1.24467	-1.0562	0.500044	-1.46595	0.329865	-1.78698	-1.92736
SMTN	0.885242	0.445674	-0.18401	0.538318	0.310411	0.0840116	-1.15404	-1.70145	-0.129695	-0.418509	-1.59439	-5.6698	-0.870492	0.636652	-3.69399	-2.42206	-2.98592	-0.840792	0.568967	1.05265	-0.940567	-0.523095	-1.72649	-3.11278	-3.53034	1.49287	-1.089	1.57293	-1.92123	-0.566933	-2.10383	-1.22197	-2.12179	0.395275	-2.35908	-3.14872	-2.47824	0.0696398	-1.10086	-0.152223	-0.574785	0.455022	-4.54584	0.498002	-1.43069	-2.37923	-0.532632	-1.08654	-2.7669
SMURF1	4.11357	-0.763779	-0.521045	-0.773015	-0.252525	-0.111909	-1.7831	-1.70145	0.689733	-1.91327	-1.59439	-1.24834	-1.9335	1.67413	-0.547148	-1.08503	-0.833918	-3.71526	0.0570677	-0.920718	-1.47108	-0.898962	-1.8045	-1.14931	-3.98977	-0.343626	0.258919	0.502536	-2.90874	-1.08333	-1.34545	-0.983393	-0.906057	-0.650528	-0.726808	-1.86861	-1.71925	-0.167399	-1.29587	-0.152223	-0.98141	-1.0076	-1.62527	-1.74527	-1.62334	-3.0382	-2.09898	-1.32754	-1.88554
SNAI1	-0.815198	-1.85689	-2.76897	-0.553138	-0.711957	0.545524	-1.43685	-0.927927	-2.21716	-0.565351	-1.4118	-2.89219	-0.537916	-1.02631	-0.0419125	-1.96033	-2.98592	-1.71526	0.0570677	-1.81884	-2.31908	-0.22519	-2.06753	-0.942855	-3.08288	0.134421	0.258919	-0.194901	-1.92123	-2.17766	-0.653	-0.0548553	-1.61655	-1.01976	-0.87365	-5.95608	-4.17868	-1.97475	-1.39405	1.12531	-2.60032	-1.50718	-2.22391	-1.52709	-1.26077	-5.70116	-2.47749	-1.88008	-4.42986
SORD	3.16589	2.7676	3.90345	-1.33615	1.9101	-1.60787	-2.92411	-3.48451	0.53773	3.36876	-2.40175	-2.38969	-0.870492	1.29562	0.0836183	-1.96033	-2.0826	1.67706	1.07036	1.62862	-0.553544	0.651236	2.73294	0.150255	-1.28933	1.63038	3.87363	2.23227	-3.90874	0.57289	-0.653	-0.0548553	-0.0536141	1.60473	1.48892	-0.356162	-1.22448	3.0196	3.90535	2.17842	1.29968	0.64607	-0.943804	-1.02013	2.78363	-1.94627	0.829938	3.03001	-0.491262
SOX2	-5.40016	-0.119923	-4.76897	-0.773015	-5.71196	-4.08591	-1.7831	1.11289	-5.80212	-5.37271	-1.81678	-2.89219	-0.0381064	-4.61128	-4.91638	-1.96033	-0.833918	0.630513	-5.69782	-6.27827	-3.05604	0.579086	-5.97442	-6.43471	-3.08288	-5.15098	-3.54844	-5.40435	-1.33209	-2.57976	-1.34545	-0.603644	-2.32109	-5.60472	-5.681	-6.95608	-4.17868	-4.97475	-4.22187	-5.19662	-6.40767	-6.36516	-5.76823	-7.35998	-3.84573	-2.15684	-3.99206	-2.46505	-7.01482
SPARC	4.41202	3.53772	4.69455	5.8408	5.59695	4.26281	0.781274	0.876239	5.73413	7.42739	2.98244	3.98458	0.979103	6.33197	5.31284	3.05878	1.50237	6.25676	6.49231	4.91094	2.98048	3.1128	5.93285	5.61888	4.09769	5.94771	5.32039	5.59776	3.52388	4.53584	0.356831	-0.447525	2.945	5.32083	5.19934	4.21134	3.56952	5.31987	3.63673	5.24943	5.62196	5.65998	3.90124	4.27936	6.52931	3.65125	5.95714	6.47365	4.0282
SPDEF	-1.94073	-1.44185	-0.245411	0.0934347	-3.71196	-0.0106253	0.401676	0.69372	-5.80212	3.49766	-0.949619	0.417662	0.332393	1.14361	-0.719984	0.15656	1.26341	-0.776662	0.0570677	2.52909	-0.248689	-0.101454	4.08492	-1.26478	0.461442	1.38818	-4.54844	2.96197	-0.668686	-0.566933	0.263231	0.652504	-0.754054	-1.21241	-1.77411	-6.95608	-1.71925	-4.97475	2.89914	-5.19662	0.207035	2.88987	-0.319772	-3.77502	-1.84573	0.0267582	0.119445	3.25468	-0.97043
SPHK1	1.80929	6.35775	3.13792	2.72974	0.960469	2.58348	-0.241618	0.238809	3.4925	0.984846	1.86712	2.79722	-1.30345	2.22161	2.77943	0.0624615	-0.70189	3.09209	1.17254	2.38707	-0.117445	1.19254	0.610542	1.24477	-1.49792	4.14823	1.45156	1.05508	0.698848	0.921227	-0.188868	0.719932	2.9725	3.12998	2.62278	3.05655	1.119	2.60267	0.670517	2.2872	1.32025	1.59485	1.60391	1.02372	1.88219	-0.571879	1.77801	1.71287	-0.507029
SPINT2	3.90362	2.64985	4.77212	0.538318	3.55483	2.44881	0.56545	-2.33344	2.72144	4.46018	0.391225	0.479946	0.332393	6.49725	2.01436	-0.400083	-0.00948993	2.82906	3.66193	4.91895	1.19188	3.01706	5.77921	3.35971	2.1701	4.34487	4.19303	4.77307	-0.453835	1.13645	-0.327624	0.652504	2.08389	4.34802	3.28189	2.28233	-0.320697	3.7326	2.14968	0.125311	2.82594	3.2805	2.54918	1.79231	3.35721	0.48206	3.62265	3.62665	1.70969
SPON1	-5.40016	-4.17882	-4.76897	-2.29768	-3.12699	-1.35411	-2.92411	-0.927927	-1.71466	0.984846	-1.81678	-3.72227	-3.05903	-2.61128	-6.50134	-1.96033	-2.47402	0.947704	-5.69782	-6.27827	-2.31908	-1.12135	-0.804496	-1.73427	-1.86049	0.372581	-4.54844	-5.40435	-2.10851	0.361081	-1.34545	-0.447525	-7.07598	-0.904285	-5.681	-6.95608	-2.47824	-4.97475	-1.95884	-2.38926	0.306571	-0.458266	-3.76823	-0.967662	-0.0383762	-1.33193	0.200582	0.213025	-1.52297
SPP1	3.90362	3.22206	0.754589	0.538318	4.87207	2.26155	-0.113081	-0.655897	4.71259	5.67374	0.713731	-0.625407	-0.265123	4.69479	2.37517	-1.08503	0.138774	4.00127	1.91689	2.76065	-0.553544	1.33808	3.02276	2.28639	-0.563504	4.36472	3.50141	4.64821	-0.914969	2.0967	-0.653	-0.603644	1.86066	4.0155	4.81884	0.844825	1.03078	5.77092	-1.95884	5.85187	3.24875	3.09017	3.26611	2.1675	4.32252	-1.94627	4.70986	3.36277	1.02957
SPRED2	0.50673	0.558149	0.400952	-1.33615	-4.71196	-1.35411	-0.541642	-0.655897	-0.994765	0.485275	-0.245242	-0.389693	-0.0381064	1.03258	-1.85749	-0.544145	0.207558	-0.0907706	0.256377	0.0615801	0.00284971	-0.22519	1.78047	0.00823588	-0.667841	-0.244091	-0.378511	1.1348	-0.391679	-1.08333	0.605918	-0.0548553	-0.906057	-1.69783	-3.681	-1.20119	-1.71925	-2.65283	0.848515	0.357972	-1.54969	0.634843	-0.533016	-1.17015	-0.730254	-0.810391	0.200582	0.342308	-1.65727
SPRY2	-0.645273	-2.59385	-4.76897	-3.22368	-5.71196	-2.36971	-2.92411	-2.33344	-5.80212	-5.37271	-1.59439	-2.89219	-3.05903	-4.61128	-6.50134	-4.55451	-2.0826	-2.71526	-0.790929	0.394155	-3.05604	-2.20382	-5.97442	-3.62735	-6.98977	-5.15098	-4.54844	-4.40435	-2.59679	-7.38711	-2.71601	-0.603644	-3.16909	-5.60472	-5.681	-6.95608	-4.17868	-4.97475	-2.5438	-5.19662	-4.40767	-6.36516	-7.35319	-2.90055	-5.43069	-4.19866	-0.0312342	-5.78698	-4.01482
SPRY4	1.44533	-0.119923	0.623345	-0.773015	-0.582674	-0.45864	0.401676	-0.927927	0.53773	1.25665	-0.949619	-0.187137	-0.265123	1.19608	0.128012	-0.040632	-0.174755	0.343632	1.97461	1.64059	-0.940567	-0.372416	1.4179	-0.434708	-0.119404	1.50723	0.206452	2.11921	-0.591793	-0.187439	-0.653	-1.22197	-0.0536141	-0.604725	-0.980565	-0.652294	-1.71925	0.273173	2.07091	0.869472	-0.0678248	1.76413	0.899471	-0.805391	-0.430694	-0.428144	0.829938	0.534953	-1.2869
SPSB1	-2.8152	0.0435757	-0.68151	-0.362383	-0.0681004	-0.753717	-0.920895	-0.655897	-1.10168	0.735819	-4.32374	-2.38969	-0.0381064	-0.611275	-0.643363	-1.6039	-1.33142	0.223338	0.711571	0.394155	-1.18157	0.79087	-0.548156	-0.942855	-1.70437	0.656374	1.17948	-2.597	-1.59679	-0.672866	-1.67537	-0.603644	-0.0536141	0.524558	0.12635	-0.464222	-0.112588	-0.0678637	0.410394	1.62356	0.905208	1.21981	-0.571835	0.453802	1.21316	-1.76256	-0.126993	-0.202013	-0.328324
SSBP3	2.91725	2.85827	3.65729	0.439289	1.18286	1.04337	0.312928	0.238809	2.71358	0.119147	0.169796	0.479946	0.160011	1.08916	2.60456	0.246886	-0.174755	2.80306	3.67939	0.997855	-0.734116	0.853379	1.54128	1.99574	0.595193	2.32475	2.45156	2.64004	0.213421	1.29237	-0.327624	1.85878	0.973867	3.09918	1.85815	0.883129	0.230713	-0.726827	-0.17748	1.5313	0.0841783	0.834515	-0.652755	-0.261947	1.4022	-0.498222	2.03979	1.26831	0.184848
ST3GAL2	-1.15223	-1.85689	-1.76897	-1.33615	-2.01152	-0.598648	-1.7831	-1.26345	-0.592667	-3.37271	-1.08786	-1.24834	-0.870492	-1.02631	-2.33142	-3.12567	-1.14835	-0.840792	0.711571	-0.27827	-2.31908	-1.12135	-0.301996	-1.73427	-3.53034	-0.903054	0.877829	-2.08243	-1.33209	-1.43292	-0.188868	-0.603644	-1.26863	-0.904285	-1.15744	-1.20119	-1.22448	-0.515323	-1.00464	0.869472	-1.40767	-0.841595	-2.4463	-1.42924	-1.26077	-1.00072	-0.799418	-0.928994	-0.805371
STAT3	2.55984	-0.515852	3.87127	-0.193929	4.2466	-0.753717	-1.43685	-0.927927	2.3527	2.97602	-0.605887	0.594306	-1.30345	4.22477	1.63308	-1.08503	-0.269134	2.79781	3.3078	2.53551	0.216975	2.0125	2.21045	1.28639	0.765118	2.43398	4.08092	2.303	-1.33209	1.61289	-0.653	-1.50027	1.95469	2.71269	3.30768	1.62135	-0.563968	3.05867	0.82252	2.78066	1.78708	1.73288	1.52945	2.35255	2.82197	-1.94627	2.22572	2.02681	1.4198
SYCP1	-5.40016	-4.17882	-4.76897	-1.73825	-5.71196	-1.35411	-1.43685	-2.33344	-5.80212	-3.37271	-2.81678	-2.89219	-0.870492	-4.61128	-3.17942	-1.31831	-1.78661	-5.30022	-5.69782	-6.27827	-1.47108	-1.12135	-5.97442	-6.43471	-3.98977	-5.15098	-4.54844	-3.08243	-2.34045	-1.08333	-0.653	-1.22197	-3.61655	-5.60472	-5.681	-6.95608	-2.47824	-4.97475	-4.22187	-5.19662	-6.40767	-6.36516	-7.35319	-7.35998	-5.43069	-3.53124	-2.99206	-5.78698	-7.01482
TBC1D2B	0.992157	0.936661	0.275421	-0.773015	0.354133	-0.927484	-0.241618	-0.655897	-0.994765	-2.37271	-1.59439	-0.625407	-0.870492	1.94331	-1.64336	-1.31831	-0.36577	-0.170941	0.0570677	0.147995	-0.117445	0.323431	0.292366	-1.26478	-1.86049	-0.566019	0.910996	0.087499	-0.33209	-0.364744	-0.188868	0.652504	-0.828054	0.482738	0.918908	0.590819	-0.112588	0.780133	0.439192	1.78066	0.373685	0.293055	-0.652755	-0.501998	0.154269	-0.6495	-0.649671	0.213025	0.592506
TBC1D9	-2.8152	0.0435757	-1.06853	-1.33615	-0.0972468	-0.331026	-0.384953	-0.229694	-0.847924	-1.20278	-0.4118	-2.38969	0.626922	0.196079	-0.31152	-0.879912	0.138774	-0.599784	-0.790929	0.365586	-0.117445	-0.691366	1.46852	-0.50397	-0.497916	1.03884	0.736966	1.1655	-1.33209	-0.92768	-0.481159	0.34175	-1.37554	-0.247173	-0.221573	-1.02534	-2.47824	0.517099	-0.277015	0.125311	-0.159747	2.11866	-0.203448	-0.605092	-0.907132	-1.00072	-0.126993	0.479811	0.279797
TBL1Y	-5.40016	-5.76378	-4.76897	-8.13057	-5.71196	-1.93907	-2.24765	-0.927927	-5.80212	-5.37271	-4.32374	-3.72227	-1.9335	-4.61128	-6.50134	-4.55451	-3.78661	-5.30022	-5.69782	-6.27827	-3.05604	-4.12135	-5.97442	-3.11278	-6.98977	-5.15098	-4.54844	-5.40435	-2.90874	-3.06518	-2.10383	-3.01046	-7.07598	-5.60472	-5.681	-6.95608	-7.76364	-4.97475	-7.5438	-5.19662	-6.40767	-6.36516	-7.35319	-7.35998	-5.43069	-8.28612	-3.99206	-5.78698	-7.01482
TBPL1	-5.40016	-1.85689	-4.76897	-1.73825	-5.71196	-1.35411	-4.23961	-1.70145	-5.80212	-5.37271	-2.81678	-5.6698	-0.870492	-4.61128	-6.50134	-1.96033	-1.78661	-5.30022	-5.69782	-6.27827	-2.31908	-4.12135	-5.97442	-6.43471	-6.98977	-5.15098	-4.54844	-4.40435	-2.59679	-5.80215	-2.71601	-0.983393	-5.49102	-5.60472	-5.681	-6.95608	-7.76364	-4.97475	-4.22187	-5.19662	-6.40767	-6.36516	-7.35319	-7.35998	-5.43069	-3.0382	-6.79942	-5.78698	-7.01482
TFAP2B	-5.40016	-5.76378	-4.76897	-1.02204	-5.71196	-1.12508	-2.92411	-1.26345	-5.80212	-5.37271	-1.59439	-3.72227	-0.870492	-4.61128	-2.33142	-1.08503	-0.469346	-5.30022	-5.69782	-6.27827	-1.83365	-1.12135	-5.97442	-6.43471	-1.59745	-5.15098	-4.54844	-5.40435	-1.21213	-2.57976	-0.653	-0.603644	-3.61655	1.00999	-5.681	-6.95608	-7.76364	-4.97475	-0.510379	-5.19662	-6.40767	-0.637236	-7.35319	-5.77502	-5.43069	-3.0382	-0.941437	-0.501573	-3.10793
TFCP2L1	1.75971	2.7676	4.13792	0.538318	0.194934	-1.12508	-0.920895	-0.229694	-0.342689	-0.980388	-0.71369	2.47922	-1.9335	-4.61128	0.627939	-1.31831	-0.70189	2.30711	2.4107	0.0792821	-0.940567	-0.372416	-5.97442	-1.26478	-3.98977	2.26687	2.28445	-2.597	-1.45384	0.182744	0.163135	0.579956	-1.16909	0.995188	2.55262	-1.95608	-1.71925	2.62516	-1.63691	-2.38926	-0.0857467	-6.36516	-1.49521	0.943801	1.83609	-1.94627	1.03979	-5.78698	-1.65727
TFEB	-1.94073	-1.44185	-3.18401	-1.73825	-2.9046	-0.927484	-2.92411	0.0988923	-0.18741	-1.91327	-0.71369	-1.70897	0.160011	-4.61128	-1.33142	-0.700362	-0.174755	-0.545336	-1.89046	-2.95634	-0.734116	-1.12135	-0.930027	-2.11278	-2.81984	-3.15098	-1.37851	-0.649467	-0.914969	-0.672866	0.163135	0.0536692	-5.49102	-2.60472	-2.22157	-2.49664	-4.17868	-4.97475	-1.39405	-0.152223	-1.60032	-2.45827	-2.3088	-1.80539	-1.18277	-1.33193	-1.51402	0.235393	-0.571881
TFF3	2.14673	-0.119923	-4.76897	0.218161	-5.71196	-1.60787	-0.717446	0.0988923	-5.80212	4.09694	-0.949619	-1.46593	-0.870492	-4.61128	-1.45695	-1.31831	-0.469346	-5.30022	-0.790929	-4.69331	-0.248689	-0.372416	1.85213	-1.91115	-0.119404	-5.15098	-4.54844	-0.194901	-0.453835	-1.43292	-0.481159	0.785923	-2.32109	2.13674	-5.681	-6.95608	-4.17868	-4.97475	-1.39405	-0.44173	-6.40767	-4.36516	-5.76823	-7.35998	-5.43069	-1.33193	-1.51402	1.14376	-7.01482
TFRC	3.21455	2.34475	2.33955	0.439289	2.16456	-0.331026	-1.15404	-0.927927	1.40733	1.68258	-0.505582	-1.24834	0.160011	2.63665	-0.109027	-1.6039	-0.580938	3.86468	-0.790929	2.21759	-0.940567	-0.523095	3.2005	0.859913	0.836779	2.91511	4.87992	1.88105	-1.33209	0.802713	-1.67537	-0.603644	0.407834	2.15016	2.96645	-0.326718	-1.22448	4.37839	0.163557	1.85867	0.811494	1.79975	-0.829633	-0.241038	2.58611	-1.76256	-1.51402	1.82036	0.083208
TGFB1	1.15443	1.53084	1.08901	2.01537	0.43779	1.48177	0.312928	0.787864	3.22025	2.24935	1.86712	1.37615	0.487962	2.11664	0.737061	0.691955	-0.174755	2.63641	1.97461	1.55462	0.31319	1.33808	1.50939	2.49898	1.37217	0.957543	1.152	1.70417	0.785951	0.525778	0.0540637	0.719932	1.05844	0.228165	0.948352	0.857706	0.740186	2.05867	0.750819	1.22965	1.15457	1.92946	-0.173286	0.640021	1.42729	1.15267	1.32986	1.3729	1.07793
TGFB2	-5.40016	0.558149	3.53024	-0.553138	-5.71196	-0.598648	-0.241618	0.238809	-0.480192	-0.728849	-1.4118	-1.70897	-0.265123	3.55865	-1.45695	-0.544145	-1.78661	1.19163	-5.69782	-6.27827	-0.553544	-2.83185	-5.97442	-2.11278	-1.70437	-0.627419	-4.54844	-1.08243	-0.914969	0.242245	0.356831	0.505478	-1.16909	-0.0501359	-2.35908	-2.63415	-0.563968	-4.97475	-3.15148	2.9275	-1.08575	0.234756	-3.10527	0.131874	1.37666	-1.46595	0.329865	-2.08654	-7.01482
TGFB3	-0.54218	-5.76378	-2.18401	-3.22368	-1.80507	-4.08591	-0.241618	-0.927927	-4.21716	0.581491	-2.40175	-1.46593	-1.30345	0.781042	-1.64336	-1.08503	-0.70189	-5.30022	-1.23839	-0.470915	-3.05604	-7.29128	-0.482568	-3.62735	-3.53034	-1.82905	-2.22651	-0.944923	-2.59679	-1.08333	-1.07711	-0.603644	-7.07598	-1.79737	-2.87365	-1.70815	-1.22448	-4.97475	-0.334349	-2.38926	-0.500784	0.480333	0.0897486	-2.03805	-1.10877	-3.53124	-0.532632	0.812938	-0.992456
TGFBR1	1.67666	2.37065	3.7027	-0.553138	2.48772	0.945935	0.115591	-0.427114	2.28534	3.42496	0.628001	0.148553	-0.870492	2.72857	-0.0419125	-0.040632	0.976867	2.42088	3.19092	1.81976	0.403388	1.244	2.10773	1.77961	1.35896	2.51435	1.94342	2.48439	-0.914969	2.18084	0.444726	0.505478	0.645117	2.5038	1.40646	0.883129	1.119	2.95006	1.41039	2.89085	1.95865	1.90631	0.0730699	2.584	2.78847	-1.20931	3.48945	3.31369	1.489
TGFBR2	1.72912	0.190417	2.31849	0.948918	0.730987	-0.331026	-1.43685	-2.33344	1.72144	2.22721	-0.328497	-0.0977777	-0.0381064	2.11664	-1.04191	-0.700362	-0.174755	1.53267	1.80203	1.58592	-1.83365	0.232283	1.9204	1.52529	-0.389856	1.24134	0.877829	1.8051	-0.914969	0.306375	-1.67537	-0.175272	-0.828054	-0.247173	1.11341	-0.0018788	-2.47824	0.0252457	1.24083	1.34254	1.38674	0.64607	3.57458	0.032338	1.37666	0.553079	0.962133	1.20171	1.8149
TGFBR3	0.300279	-4.17882	3.24784	0.797211	1.04293	-0.45864	-1.7831	-0.927927	-0.247531	0.735819	-2.81678	0.148553	-0.870492	-4.61128	-0.643363	-0.700362	-0.833918	2.20757	2.0301	1.85616	-2.31908	2.04188	-0.301996	0.104451	-2.34591	0.656374	-1.96347	-1.81939	-0.74435	-0.566933	-1.67537	0.719932	-0.110198	-0.904285	-0.25474	-2.78615	-0.85675	-2.97475	0.338841	1.12531	-0.707235	-1.32076	-2.65276	0.864022	3.04098	-0.90242	2.05856	-0.832779	-0.194645
THPO	-5.40016	-5.76378	-4.76897	-3.22368	-5.71196	-4.08591	-0.920895	-1.26345	-5.80212	-5.37271	-2.07982	-2.38969	-1.9335	-4.61128	-4.91638	-1.6039	-1.54114	-5.30022	-5.69782	-6.27827	-4.64101	-1.73669	-5.97442	-6.43471	-4.98977	-5.15098	-4.54844	-5.40435	-1.33209	-5.80215	-0.85094	-0.303311	-3.61655	-5.60472	-5.681	-6.95608	-4.17868	-4.97475	-2.84336	-2.38926	-6.40767	-6.36516	-7.35319	-7.35998	-5.43069	-3.0382	-1.75502	-5.78698	-7.01482
THRSP	-3.8152	-1.44185	-4.76897	-0.193929	-5.71196	0.172821	-0.541642	-0.0560662	-5.80212	-0.980388	-1.24075	-1.46593	0.160011	-4.61128	-2.69399	-1.6039	0.398742	-4.30022	-3.11286	-2.37138	-0.940567	-1.12135	-2.65249	-1.57673	-0.119404	-0.758664	-4.54844	1.57293	-1.01183	-0.0295596	-0.653	0.579956	-2.32109	-2.60472	-5.681	-6.95608	-1.71925	-4.97475	1.59319	-2.38926	-4.82271	-6.36516	-2.4463	-2.35998	-5.43069	-0.428144	-1.30757	-5.78698	-2.7669
TMC5	3.98354	-5.76378	-4.76897	-2.29768	-5.71196	-2.36971	-1.15404	-0.655897	-5.80212	0.119147	-0.328497	-3.72227	-0.265123	1.47619	-3.69399	-0.879912	-1.33142	-5.30022	-1.89046	0.0792821	-1.47108	-0.898962	-5.97442	-3.11278	-0.497916	-2.82905	-4.54844	2.70939	-2.34045	-2.57976	-0.85094	-1.50027	-7.07598	-5.60472	-2.51108	-6.95608	-1.71925	-4.97475	-2.84336	-5.19662	1.15457	0.0611079	-2.14374	-7.35998	-5.43069	-2.37923	-2.47749	-1.26341	-7.01482
TMEM191A	-5.40016	-1.06334	-4.76897	-0.553138	-5.71196	0.40594	0.00662595	0.0988923	-4.21716	-0.418509	-0.505582	-0.899727	-0.870492	-4.61128	-3.69399	-1.08503	-0.0897573	-5.30022	-3.11286	-6.27827	-0.940567	-0.372416	-5.97442	-3.11278	-2.59745	-5.15098	-2.96347	-1.81939	-1.21213	-1.89526	0.163135	0.785923	-2.12179	-5.60472	-5.681	-6.95608	-2.47824	-4.97475	-2.84336	-5.19662	-6.40767	-6.36516	-5.76823	-7.35998	-5.43069	-3.53124	-0.799418	-5.78698	-7.01482
TMEM45B	2.22189	-5.76378	-4.76897	-1.02204	-5.71196	-0.927484	-1.43685	-1.26345	-5.80212	-5.37271	-1.4118	-1.46593	-1.30345	2.06115	-2.33142	-2.42206	-0.985921	-5.30022	-5.69782	-6.27827	-0.940567	-1.12135	-5.97442	-2.43471	-2.81984	-5.15098	-4.54844	-3.08243	-1.21213	-2.17766	-0.062295	-0.447525	-5.49102	-5.60472	-5.681	-6.95608	-4.17868	-4.97475	-1.52143	-5.19662	-6.40767	-3.78019	-3.26573	-5.03805	-5.43069	-2.37923	-6.79942	-2.32754	-7.01482
TNC	-1.40016	-1.06334	-3.76897	0.0934347	-1.71196	-1.12508	-0.717446	-0.927927	-0.409803	-0.418509	-0.71369	-1.46593	-0.870492	3.13019	-0.828919	-0.879912	-0.174755	-1.49287	-5.69782	-1.57783	-1.83365	-2.83185	-0.548156	-1.26478	-0.497916	-1.34363	-0.741081	-0.194901	-1.45384	0.112734	-0.327624	-1.22197	-1.9467	-2.4348	-5.681	-4.63415	-0.563968	-4.97475	-1.52143	0.993207	-2.40767	-0.905725	2.74352	-1.29389	-2.62334	-1.59962	1.97866	-1.14312	-4.42986
TNFAIP8	-0.00784314	-0.119923	-1.18401	-1.33615	-1.71196	-2.36971	-0.920895	-0.927927	-0.847924	-5.37271	-1.4118	-1.70897	-1.30345	0.781042	-4.91638	-1.31831	-1.33142	-3.30022	-0.449892	0.321643	-1.18157	-1.73669	-0.582103	-2.43471	-2.34591	-2.82905	-0.641545	-2.08243	-4.95936	-2.57976	-1.67537	-1.22197	-3.61655	-1.4348	-0.551722	-0.978795	-2.47824	-1.1674	-0.775618	-2.38926	-1.05012	-1.84159	-3.10527	-2.19005	-1.62334	-1.33193	-0.532632	0.0459149	-0.491262
TNFRSF12A	1.59984	2.24745	-0.862082	1.21151	1.36486	0.786212	-0.541642	0.238809	2.5902	2.62165	0.491724	0.291028	-0.870492	3.84405	0.627939	-0.269109	0.275999	1.90923	1.07036	1.54828	0.00284971	-0.898962	1.2544	2.31684	0.0763202	2.04869	-0.741081	3.1074	0.1281	1.26394	-0.653	-0.447525	0.645117	1.08178	-0.433077	-3.25564	0.0692499	2.63996	-1.18625	0.531303	1.25766	2.37631	-0.265732	1.34392	1.35067	-1.20931	1.59719	0.827735	-0.729422
TOP2A	2.8713	2.31304	4.91227	-0.193929	3.15223	0.672786	-0.384953	-0.0560662	1.10477	1.75658	0.28631	-2.38969	-0.537916	2.14361	1.11337	0.0624615	-0.269134	3.36511	2.89837	1.15636	-0.393079	0.918174	2.3565	0.914021	1.07632	2.67557	4.05889	2.1348	0.0850308	1.97264	-1.07711	1.02062	1.61052	2.24702	1.07388	0.401477	1.03078	2.06964	-0.636911	3.3921	-0.198221	-0.664717	-1.399	1.4181	3.05312	-1.94627	1.22849	-0.0590546	-0.0261394
TP53	-0.54218	-0.515852	4.30249	-0.0431041	-0.0681004	-0.598648	-1.15404	-0.927927	0.966064	1.31379	-1.81678	-0.899727	-1.30345	2.06115	0.509883	-1.31831	-0.469346	-0.212761	0.0570677	1.13958	-1.47108	0.651236	0.417897	-0.849745	-0.345913	2.74989	3.79141	0.881048	-1.45384	-1.23736	-0.85094	0.251206	-1.49102	2.86695	2.41703	-0.546684	-2.47824	-3.97475	-0.0439561	-0.44173	1.00172	-0.810568	0.0897486	0.427923	-0.145291	-2.15684	0.77801	2.34231	0.155101
TP53TG1	1.40719	0.850931	2.61473	1.01918	0.887956	2.58348	0.00662595	0.69372	1.4925	2.32773	0.831341	0.646965	2.26944	2.17008	1.3813	-0.700362	1.01575	0.699776	0.841339	1.33644	1.33627	1.95427	2.27351	-0.368618	0.461442	2.42645	3.06627	2.0135	0.0374128	0.757547	0.751828	3.10028	0.299057	1.05349	1.90396	0.320049	-0.85675	2.54095	1.82689	1.62356	1.63672	2.18174	0.114411	0.784679	2.85008	0.711055	-1.30757	2.85688	1.58509
TPM1	1.78966	-0.515852	2.69863	-1.73825	0.811605	-1.93907	-1.15404	-0.655897	1.37779	-0.124778	-1.81678	-1.46593	-0.265123	1.19608	-2.33142	-1.31831	-1.33142	-0.656368	-0.174258	0.213583	-1.47108	-0.101454	0.292366	-0.849745	-1.49792	0.707	-0.963473	2.05508	-1.74435	-3.06518	-2.10383	0.34175	-2.32109	-0.604725	-0.00857931	-0.513132	-7.76364	1.62516	0.410394	0.125311	0.487143	1.07779	-0.203448	0.997573	0.944346	-2.37923	-0.126993	0.167221	-0.00359687
TSR1	-0.312698	0.445674	2.32906	-1.02204	1.44791	-1.60787	-1.7831	-0.0560662	-1.4098	-0.243423	-1.59439	-3.72227	-1.30345	-1.02631	-1.04191	-1.96033	-0.985921	0.343632	0.711571	-0.128523	-0.553544	-0.372416	0.533374	-0.576727	-2.81984	1.03884	2.03653	0.572926	-2.10851	-0.92768	-0.481159	-0.303311	-0.828054	0.804666	1.0055	-1.70815	0.230713	2.15453	0.269979	1.5313	-0.453478	-0.532267	-0.571835	-0.371295	1.58053	-2.15684	-0.941437	0.622416	-0.444969
TTL	1.40719	1.68743	1.91753	-2.29768	2.49261	-0.45864	-4.23961	-0.927927	-0.0472327	1.60457	-1.4118	-1.46593	-3.05903	1.97369	-0.547148	-1.96033	-1.33142	1.46796	1.6685	1.77701	-0.117445	-0.101454	0.726019	-1.26478	-0.881245	2.54946	2.87783	1.51451	-1.33209	0.112734	-0.653	0.157033	-0.754054	2.30217	0.585782	0.183476	-0.85675	2.6473	1.08919	2.82019	1.39968	0.892231	-0.223912	0.247351	1.99557	-1.46595	0.457969	0.827735	-0.156843
TUBB4	-5.40016	-5.76378	-4.76897	-1.33615	-5.71196	-0.753717	-0.920895	-1.26345	-5.80212	-0.980388	-2.40175	-1.70897	-0.870492	-4.61128	-3.17942	-0.544145	-0.70189	-5.30022	-5.69782	-5.27827	-1.47108	0.232283	-5.97442	-2.43471	-2.18241	0.521444	-3.54844	-2.08243	-2.34045	-1.63222	-0.85094	0.157033	-0.361736	-0.746744	-5.681	-6.95608	-4.17868	-4.97475	-4.22187	0.710273	-6.40767	-6.36516	-7.35319	-5.77502	-5.43069	-2.67141	0.200582	-1.97962	-7.01482
TUFT1	1.65512	1.2915	1.57088	-2.29768	-0.220104	-1.12508	-0.717446	0.593001	0.50166	-1.56535	-0.949619	-1.24834	-1.9335	2.19608	-2.10903	-3.12567	-1.14835	-0.393333	0.568967	-0.956342	-1.18157	-0.22519	0.383131	-1.26478	-1.49792	0.206571	-2.22651	0.239502	-1.10851	-0.0295596	0.163135	-0.603644	-0.906057	0.604729	-2.51108	-3.14872	-0.563968	1.00253	-0.566522	-0.152223	-1.27839	-0.637236	-0.297912	0.0662853	0.0928683	-2.15684	-0.0312342	-0.327543	-0.144459
TYMS	-0.0782325	4.06594	3.90698	-1.02204	2.13353	-1.93907	-0.717446	-1.26345	0.898319	0.581491	-1.08786	-0.625407	0.160011	2.86446	-0.31152	-2.42206	-2.47402	2.9141	1.52135	1.07046	-1.47108	1.19254	0.580168	0.104451	-1.59745	2.59721	4.35243	0.917574	-2.10851	-0.672866	-0.85094	-0.175272	0.190805	2.96513	1.62278	0.778635	-1.71925	3.77679	-1.95884	3.29122	-0.140888	-0.21541	-5.03127	0.276645	3.0771	-1.33193	-0.307565	0.797987	-1.23346
UBE2C	3.391	2.28061	3.92451	0.439289	2.9355	-0.220843	-4.23961	-0.655897	0.870305	1.92192	-1.24075	-1.70897	-0.537916	3.71515	0.509883	-1.31831	-1.33142	2.46796	2.18482	1.62862	-1.18157	1.38115	2.80037	0.832079	0.572473	3.3765	4.42598	2.49651	-1.45384	0.624116	-1.34545	1.55617	0.731373	3.38112	1.93371	0.968737	-0.112588	3.99679	0.590624	3.82019	1.01859	0.929464	-1.06779	1.63154	2.84077	-1.20931	0.266671	1.68063	-0.992456
UBE2T	0.939689	1.35516	2.71484	-1.73825	2.15223	-2.36971	-1.7831	-0.655897	-0.592667	-0.124778	-2.81678	-2.38969	-3.05903	1.84816	-1.17942	-2.42206	-1.14835	0.191629	1.35746	0.798546	-2.31908	-0.523095	1.3919	-1.73427	-1.70437	2.87692	2.24598	0.239502	-2.34045	0.306375	-0.481159	-1.22197	0.407834	2.6432	0.918908	-0.708148	-2.47824	1.96776	-2.84336	2.17842	-0.915822	-1.36516	-2.54584	-1.0562	1.50004	-3.53124	-1.30757	0.167221	-1.7669
UGT8	0.0916925	1.35516	1.08901	-0.193929	-0.904602	-1.12508	0.00662595	-0.927927	-0.18741	-1.56535	-0.71369	-1.06777	-1.9335	-4.61128	-1.64336	-1.31831	-0.70189	0.722144	0.410705	-0.920718	-1.83365	0.579086	-5.97442	-2.43471	-6.98977	0.871386	0.736966	-2.597	-1.59679	-0.456374	-0.062295	-0.603644	-1.37554	-0.17846	-0.288687	-2.20119	-2.47824	0.484677	-5.5438	-2.38926	-2.15975	-6.36516	-7.35319	-3.19005	1.29723	-2.15684	-0.532632	-5.78698	-1.06063
UTP14A	2.64969	1.82118	0.72288	1.71178	-0.285692	0.610557	-0.717446	-0.927927	0.00523467	0.212257	-0.16653	-0.756057	-0.870492	0.848156	0.838506	-1.96033	-0.174755	0.677056	0.256377	-0.420289	-2.31908	0.021604	-0.582103	-0.167921	-1.70437	0.630378	2.03653	-0.0120367	-0.215971	-1.23736	-0.85094	-1.50027	0.152837	-0.475442	-0.926117	-3.25564	-0.85675	-0.116773	-2.33435	1.44724	-1.36328	-2.04323	-1.68077	-2.35998	0.241732	-1.46595	-0.799418	-1.32754	-2.01482
VAV3	-0.400161	-5.76378	1.31849	-1.73825	1.56417	-2.98638	-1.43685	-2.33344	-5.80212	0.485275	-2.81678	-2.89219	-3.05903	-2.02631	-2.33142	-4.55451	-1.78661	-0.346028	-1.89046	0.435976	-2.31908	-2.20382	1.17533	-1.43471	-3.53034	0.492875	2.64139	1.68311	-3.90874	-1.23736	-2.10383	-1.85518	-2.82805	0.0677006	-0.471551	-3.78615	-7.76364	-4.97475	0.410394	1.44724	-6.40767	1.37631	-0.223912	-2.19005	1.55799	-1.76256	0.0460716	-1.26341	0.00754369
VEGFA	2.84777	2.03064	4.01893	0.0934347	3.94268	2.11376	-0.241618	-0.427114	2.89832	3.19715	-0.71369	0.889166	-0.537916	6.04783	1.40555	-1.96033	-0.0897573	2.23893	2.83746	2.16467	-0.553544	2.34172	2.91432	0.333477	-0.345913	4.50723	3.59622	3.81239	-1.59679	1.26394	-0.188868	0.424925	2.3034	3.59985	3.49641	1.35226	-1.22448	2.87699	1.71359	4.60104	1.58668	2.51136	0.559694	1.9821	3.97445	-0.367261	-0.126993	2.9779	-0.273357
VGLL1	-5.40016	-5.76378	-4.76897	-1.33615	-5.71196	-2.36971	-0.717446	-2.33344	-5.80212	-1.91327	-1.81678	-2.38969	-1.30345	-4.61128	-2.10903	-1.6039	-1.54114	-5.30022	-1.23839	-6.27827	-1.83365	-2.20382	-5.97442	-3.62735	-3.53034	-5.15098	-4.54844	-5.40435	-1.92123	-1.63222	-2.10383	-4.35442	-1.26863	-5.60472	-5.681	-6.95608	-7.76364	-0.804829	-5.5438	-5.19662	-6.40767	-6.36516	-7.35319	-1.29389	-5.43069	-1.94627	-1.51402	-5.78698	-7.01482
WAPAL	1.53058	0.558149	1.53481	-0.193929	0.697434	-0.331026	-0.241618	-0.0560662	-1.10168	-0.418509	-0.328497	-1.46593	1.08039	1.55865	-2.10903	-0.151663	0.668582	-0.545336	-0.449892	0.628621	-0.248689	-0.691366	0.871069	-1.91115	-1.86049	2.02893	2.20645	-0.194901	-1.33209	-1.08333	0.163135	0.505478	-1.07598	1.37256	1.06046	-0.689289	-1.71925	1.8326	0.237558	1.34254	0.0680586	-0.277694	-0.625274	-0.326556	0.77876	-1.59962	-1.09898	1.11992	0.643387
WDR3	-0.190707	-1.85689	1.13792	-0.773015	1.23056	-0.927484	-1.43685	-0.655897	-1.4098	-3.37271	-1.24075	-2.01772	-0.870492	-0.44135	-0.946755	-3.12567	-2.47402	0.284739	0.0570677	-0.605845	-1.47108	-2.20382	-1.65249	-6.43471	-2.59745	0.549458	1.68038	0.087499	-2.34045	-0.802149	-0.85094	-1.50027	-0.600249	0.545022	1.06046	-2.20119	-7.76364	1.34717	-3.15148	0.869472	-1.15975	-1.66472	-2.14374	-2.11205	1.48817	-2.15684	-1.09898	-0.172265	-1.46024
WISP2	-5.40016	-5.76378	0.0383822	-1.02204	-0.252525	-0.45864	-1.7831	-1.26345	0.992296	2.15086	-1.08786	-0.899727	-9.32582	-0.026313	-0.161494	-1.6039	0.066546	-0.776662	-3.11286	-0.786417	-1.83365	-1.12135	0.154862	0.333477	-0.0355727	-1.69155	1.00615	-0.944923	-1.33209	-0.92768	-0.653	-2.31339	-2.12179	-2.60472	-5.681	0.233749	-4.17868	-4.97475	0.533014	-0.874689	1.31342	0.110577	-0.893763	-1.80539	0.613701	-0.810391	2.05856	2.67246	-0.491262
WNT1	-5.40016	-5.76378	-4.76897	-1.33615	-5.71196	-7.89327	-4.23961	-0.655897	-5.80212	-5.37271	-3.36222	-8.47716	-0.870492	-4.61128	-2.33142	-1.6039	-1.78661	-5.30022	-5.69782	-6.27827	-4.64101	-4.12135	-5.97442	-6.43471	-6.98977	-5.15098	-4.54844	-5.40435	-3.90874	-2.57976	-1.34545	-0.603644	-7.07598	-5.60472	-5.681	-6.95608	-4.17868	-4.97475	-2.84336	-5.19662	-6.40767	-6.36516	-7.35319	-7.35998	-5.43069	-4.19866	-3.99206	-5.78698	-7.01482
WNT3A	-5.40016	-5.76378	-4.76897	-1.33615	-5.71196	-2.98638	-4.23961	-9.75129	-5.80212	-5.37271	-4.32374	-8.47716	-1.30345	-4.61128	-2.33142	-1.6039	-1.14835	-5.30022	-5.69782	-6.27827	-2.31908	-1.73669	-5.97442	-6.43471	-6.98977	-5.15098	-4.54844	-5.40435	-3.34045	-5.80215	-1.34545	-0.783392	-2.82805	-5.60472	-5.681	-6.95608	-7.76364	-4.97475	-7.5438	-5.19662	-6.40767	-6.36516	-7.35319	-7.35998	-5.43069	-5.70116	-2.99206	-5.78698	-7.01482
YIPF5	0.939689	0.323684	2.83094	-0.773015	0.680361	-1.35411	-0.541642	-0.927927	0.767735	0.581491	-2.07982	-1.24834	-0.0381064	2.34292	-0.828919	-0.400083	-0.580938	1.20757	1.07036	0.394155	-1.83365	-0.523095	1.27351	0.49603	0.043654	2.01894	2.09542	1.2395	-0.914969	-0.92768	-0.062295	-0.175272	-0.00989275	1.0677	1.07388	-0.356162	-0.85675	1.45151	0.269979	2.06077	0.487143	0.956771	0.414989	0.179179	0.500044	-0.182837	0.119445	0.63929	0.298059
YPEL2	-2.8152	-5.76378	-4.76897	-1.33615	-5.71196	-0.598648	-1.7831	-0.229694	-4.21716	-0.565351	-1.08786	-0.899727	-3.05903	-4.61128	-2.33142	-1.08503	-1.33142	-5.30022	-1.89046	-1.47091	-0.734116	-4.12135	-2.06753	-2.73427	-3.53034	-5.15098	-4.54844	-3.08243	-1.59679	-1.43292	-1.34545	-1.22197	-2.32109	-5.60472	-5.681	-2.78615	-4.17868	-4.97475	-0.44577	-5.19662	-6.40767	-4.78019	-1.10527	-3.77502	-5.43069	-1.33193	-0.649671	-3.20201	-3.6929
YRDC	1.44533	-0.515852	1.64042	0.218161	1.10822	-0.111909	-0.541642	0.238809	-5.80212	-2.37271	-0.71369	-0.899727	0.160011	-0.44135	0.185156	-3.12567	-0.36577	-1.9783	0.410705	-0.395627	-0.734116	-0.691366	-0.359711	-1.43471	-1.28933	-0.0216983	1.53903	0.453627	-1.33209	-0.92768	-0.481159	1.39842	-1.26863	-0.0197623	-0.288687	-1.52981	-1.22448	0.753166	-0.44577	0.357972	-0.453478	-1.78019	-0.723838	-1.3827	0.698589	-0.90242	0.329865	0.827735	-0.144459
ZFP36L1	5.65309	5.14161	6.64835	2.23685	4.20093	2.91248	2.73027	2.88759	4.94859	5.79785	3.13612	1.63789	3.20751	7.58962	3.558	1.91058	2.56582	4.82131	4.66303	4.64059	3.35291	3.44343	4.80612	4.04103	4.03745	4.6898	5.58984	4.71847	2.94924	4.21559	3.65181	2.86401	4.69386	4.84546	3.87358	3.81706	3.68551	4.09939	4.9493	5.07368	3.87541	4.9652	4.29875	4.21556	4.8089	2.93908	5.29334	4.47864	3.51363
ZNF318	-0.645273	-2.59385	1.65729	-3.22368	0.457968	-1.93907	-1.15404	-1.26345	-0.847924	-1.91327	-2.81678	-2.01772	-0.870492	-0.44135	-1.33142	-3.12567	-0.985921	-1.71526	-0.449892	0.213583	-3.05604	-0.523095	-0.330565	-6.43471	-1.98977	0.403607	-0.548436	-1.08243	-2.90874	-1.89526	-1.34545	-0.0548553	-1.16909	0.752827	0.585782	-0.978795	-2.47824	0.0696398	-0.929092	1.5313	-0.0857467	-0.43442	-1.96088	-0.527089	0.739231	-2.37923	-1.30757	-0.832779	-0.460235
ZNF395	2.0261	2.03064	2.94527	1.21151	-0.0115169	1.73427	0.486491	0.366349	1.4925	1.48528	-0.4118	0.889166	0.487962	0.848156	1.02222	-0.040632	1.16307	1.83933	1.52135	0.798546	-0.248689	2.09674	0.549141	-0.368618	-1.10713	0.681909	2.40576	2.85774	0.25565	1.10073	0.0540637	1.12505	0.531348	0.0957149	0.761939	-1.02534	0.375911	1.3651	0.439192	1.5313	-0.574785	-0.458266	0.340292	-0.083855	0.909156	-1.46595	1.95547	0.279114	0.298059
ZNF44	-5.40016	-0.304348	1.81599	0.439289	-2.01152	0.172821	-0.241618	-0.927927	-3.48019	-0.980388	-0.328497	-0.625407	-0.0381064	0.295615	-1.45695	-0.269109	-1.14835	-1.71526	-3.11286	-0.0688165	-0.393079	-1.40864	-0.689019	-2.43471	-3.53034	-1.45054	0.0954203	-0.944923	-1.10851	-0.802149	0.356831	0.719932	-1.16909	-0.960869	-1.22157	-1.31222	-1.22448	-2.38979	0.473006	0.125311	-1.76382	-1.0076	-0.943804	-1.29389	-1.84573	-0.6495	-1.75502	-1.46505	-0.622507
[truncated: 40 more columns]

## Sheet: Supplemental Table 6
Cluster I upregulated genes	Cluster II upregulated genes	Cluster III upregulated genes		Genes were first filtered by an ANOVA using the Cluster I-III membership as the factor. P-values were adjusted for multiple comparisons by the Benjamini Hochberg method. Genes with an ANOVA FDR of <0.01 were compared using a Tukey's post-hoc test. Cluster-specific genes were defined as those upregulated genes with a Tukey's p-value of <0.01 for the comparison versus both alternate clusters.
ABAT	ALDH1A1	ANLN
ACOT4	EGR1	BIRC5
ACOX2	FILIP1L	BRIX1
ACSBG1	FOS	BYSL
ACSM5	SFRP4	CCNB1
ADRB2	TGFB3	CDC20
AGTR2		DSC2
AGXT2L1		EFNA1
AKR7A3		GAPDH
ALDH3A1		GTPBP4
ALDH4A1		H2BFS
ANK1		HIST1H2BF
AURKA		KIF2C
B4GALT6		MLXIP
BRDT		MYBL2
C4orf31		NCAPD2
CD1E		NOP16
CDKN2AIP		ORC6L
CDX2		PPAN
CKMT2		PPAT
CTSL2		PTTG1
CUBN		RRM2
CXCL3		RRS1
CXCR1		TFRC
CXCR2		TNFRSF12A
CXorf61		TOP2A
DEGS2		TYMS
DNAJC12		UBE2C
EGF		UBE2T
ERBB4		VEGFA
FGB
FLVCR2
GABBR2
GAL
GATA2
GLUD2
GLYATL1
GNG4
GPR3
GSTM1
HDGFRP3
HGD
HMGA2
IL11
IL5
IL6
KAZALD1
KIAA1467
LARP6
LIF
LRRC31
MAP2K3
MAPT
MAS1
MCCC2
NANOG
NAT1
OLIG2
PAIP2B
PDLIM4
PGR
PNPLA4
POLR3G
PTH
RAB11FIP4
RAMP1
RASL10A
REEP1
SATB2
SGK1
SLC17A3
SLC1A5
SLC25A18
SOX2
SYCP1
TBL1Y
TBPL1
THPO
TMEM191A
TMEM45B
TUBB4
VGLL1
WNT1
WNT3A

## Sheet: Supplemental Table 7
Cluster I upregulated genesets
Collection(s):	C2
# overlaps shown:	20
# genesets in collections:	4722
# genes in comparison (n):	74
# genes in universe (N):	45956
Gene Set Name	# Genes in Gene Set (K)	Description	# Genes in Overlap (k)	k/K	p-value	FDR q-value
SMID_BREAST_CANCER_BASAL_DN	701	Genes down-regulated in basal subtype of breast cancer samles.	18	0.0257	0	0
FARMER_BREAST_CANCER_BASAL_VS_LULMINAL	330	Genes which best discriminated between two groups of breast cancer according to the status of ESR1 and AR [GeneID=2099;367]: basal (ESR1- AR-) and luminal (ESR1+ AR+).	12	0.0364	2.27e-13	5.36e-10
DOANE_BREAST_CANCER_ESR1_UP	112	Genes up-regulated in breast cancer samples positive for ESR1 [GeneID=2099] compared to the ESR1 negative tumors.	8	0.0714	1.27e-11	2e-08
YOSHIMURA_MAPK8_TARGETS_UP	1305	Genes up-regulated in vascular smooth muscle cells (VSMC) by MAPK8 (JNK1) [GeneID=5599].	16	0.0123	2.34e-10	2.76e-07
SMID_BREAST_CANCER_LUMINAL_B_UP	172	Genes up-regulated in the luminal B subtype of breast cancer.	8	0.0465	3.99e-10	3.77e-07
REACTOME_GPCR_LIGAND_BINDING	408	Genes involved in GPCR ligand binding	10	0.0245	1.18e-09	9.3e-07
BENPORATH_ES_WITH_H3K27ME3	1118	Set 'H3K27 bound': genes posessing the trimethylated H3K27 (H3K27me3) mark in their promoters in human embryonic stem cells, as identified by ChIP on chip.	14	0.0125	2.76e-09	1.86e-06
VECCHI_GASTRIC_CANCER_EARLY_DN	367	Down-regulated genes distinguishing between early gastric cancer (EGC) and normal tissue samples.	8	0.0218	1.46e-07	8.62e-05
SMID_BREAST_CANCER_RELAPSE_IN_BRAIN_DN	85	Genes down-regulated in brain relapse of breast cancer.	5	0.0588	2.8e-07	0.000127
VANTVEER_BREAST_CANCER_ESR1_UP	167	Up-regulated genes from the optimal set of 550 markers discriminating breast cancer samples by ESR1 [GeneID=2099] expression: ER(+) vs ER(-) tumors.	6	0.0359	3.18e-07	0.000127
KEGG_HEMATOPOIETIC_CELL_LINEAGE	88	Hematopoietic cell lineage	5	0.0568	3.33e-07	0.000127
REACTOME_CLASS_B_2_SECRETIN_FAMILY_RECEPTORS	88	Genes involved in Class B/2 (Secretin family receptors)	5	0.0568	3.33e-07	0.000127
YANG_BREAST_CANCER_ESR1_UP	36	Genes up-regulated in early primary breast tumors expressing ESR1 [GeneID=2099] vs the ESR1 negative ones.	4	0.1111	3.51e-07	0.000127
BENPORATH_PRC2_TARGETS	652	Set 'PRC2 targets': Polycomb Repression Complex 2 (PRC) targets; identified by ChIP on chip on human embryonic stem cells as genes that: posess the trimethylated H3K27 mark in their promoters and are bound by SUZ12 [GeneID=23512] and EED [GeneID=8726] Polycomb proteins.	9	0.0138	1.07e-06	0.000347
FARMER_BREAST_CANCER_APOCRINE_VS_BASAL	330	Genes which best discriminate between two groups of breast cancer according the status of ESR1 and AR [GeneID=2099;367]: apocrine (ESR1- AR+) vs basal (ESR1- AR-).	7	0.0212	1.1e-06	0.000347
LIEN_BREAST_CARCINOMA_METAPLASTIC_VS_DUCTAL_DN	114	Genes down-regulated between two breast carcinoma subtypes: metaplastic (MCB) and ductal (DCB).	5	0.0439	1.21e-06	0.000357
MIKKELSEN_NPC_HCP_WITH_H3K27ME3	341	Genes with high-CpG-density promoters (HCP) bearing histone H3 trimethylation mark at K27 (H3K27me3) in neural progenitor cells (NPC).	7	0.0205	1.37e-06	0.00038
BIOCARTA_STEM_PATHWAY	15	Regulation of hematopoiesis by cytokines	3	0.2	1.8e-06	0.000472
REACTOME_SIGNALING_BY_GPCR	920	Genes involved in Signaling by GPCR	10	0.0109	2.22e-06	0.000553
PHONG_TNF_TARGETS_UP	63	Genes up-regulated in Calu-6 cells (lung cancer) at 1 h time point after TNF [GeneID=7124] treatment.	4	0.0635	3.43e-06	0.00081
Cluster II upregulated genesets
Collection(s):	C2
# overlaps shown:	20
# genesets in collections:	4722
# genes in comparison (n):	5
# genes in universe (N):	45956
Gene Set Name	# Genes in Gene Set (K)	Description	# Genes in Overlap (k)	k/K	p-value	FDR q-value
WINTER_HYPOXIA_METAGENE	242	Genes regulated by hypoxia, based on literature searches.	4	0.0165	3.74e-09	1.76e-05
TARTE_PLASMA_CELL_VS_PLASMABLAST_UP	398	Genes up-regulated in mature plasma cells compared with plasmablastic B lymphocytes.	4	0.0101	2.75e-08	4.44e-05
JECHLINGER_EPITHELIAL_TO_MESENCHYMAL_TRANSITION_DN	66	Genes down-regulated during epithelial to mesenchymal transition (EMT) induced by TGFB1 [GeneID=7040] in the EpH4 cells (mammary epithelium cell line transformed by HRAS [GeneID=3265]).	3	0.0455	2.82e-08	4.44e-05
WEST_ADRENOCORTICAL_TUMOR_DN	546	Down-regulated genes in pediatric adrenocortical tumors (ACT) compared to the normal tissue.	4	0.0073	9.76e-08	0.000115
CHASSOT_SKIN_WOUND	10	List of the transcription factors up-regulated 1 hr after wounding HDF cells (dermal fibroblasts).	2	0.2	4.26e-07	0.000402
FRIDMAN_SENESCENCE_DN	13	Genes down-regulated in senescent cells.	2	0.1538	7.38e-07	0.000581
LIU_IL13_PRIMING_MODEL	15	Genes up-regulated in BEAS-2B cells (bronchial epithelium) stimulated with IL13 [GeneID=3596] on days 1 to 3, rested on days 4 and 5, and then restimulated on day 6 for 1 h before lysis (priming model).	2	0.1333	9.94e-07	0.00067
DELYS_THYROID_CANCER_DN	232	Genes down-regulated in papillary thyroid carcinoma (PTC) compared to normal tissue.	3	0.0129	1.26e-06	0.00067
OSWALD_HEMATOPOIETIC_STEM_CELL_IN_COLLAGEN_GEL_UP	233	Genes up-regulated in hematopoietic stem cells (HSC, CD34+ [GeneID=947]) cultured in a three-dimentional collagen gel compared to the cells grown in suspension.	3	0.0129	1.28e-06	0.00067
AMIT_EGF_RESPONSE_40_MCF10A	19	Genes whose expression peaked at 40 min after stimulation of MCF10A cells with EGF [GeneID=1950].	2	0.1053	1.62e-06	0.000764
GRAESSMANN_APOPTOSIS_BY_DOXORUBICIN_UP	1142	Genes up-regulated in ME-A cells (breast cancer) undergoing apoptosis in response to doxorubicin [PubChem=31703].	4	0.0035	1.86e-06	0.000791
MCBRYAN_PUBERTAL_BREAST_4_5WK_UP	271	Genes up-regulated during pubertal mammary gland development between week 4 and 5.	3	0.0111	2.01e-06	0.000791
MISHRA_CARCINOMA_ASSOCIATED_FIBROBLAST_UP	24	Top genes up-regulated in mesenchyme stem cells (MSC) grown in a tumor conditioned medium, which leads to carcinoma-associated fibroblast phenotype.	2	0.0833	2.61e-06	0.000948
AMIT_SERUM_RESPONSE_40_MCF10A	32	Genes whose expression peaked at 40 min after stimulation of MCF10A cells with serum.	2	0.0625	4.69e-06	0.00158
PID_MAPKTRKPATHWAY	34	Trk receptor signaling mediated by the MAPK pathway	2	0.0588	5.31e-06	0.00166
RODRIGUES_NTN1_AND_DCC_TARGETS	35	Genes down-regulated in HCT8/S11 cells (colon cancer) which lack DCC [GeneID=9423] and stably express NTN1 [GeneID=1630].	2	0.0571	5.63e-06	0.00166
BROWNE_HCMV_INFECTION_2HR_UP	39	Genes up-regulated in primary fibroblast cell culture point after infection with HCMV (AD169 strain) at 2 h time point that were not up-regulated at the previous time point, 1 h.	2	0.0513	7.01e-06	0.00184
WANG_LSD1_TARGETS_DN	39	Genes down-regulated after Cre-lox knockout of LSD1 [GeneID=23028] in pituitary.	2	0.0513	7.01e-06	0.00184
RIZ_ERYTHROID_DIFFERENTIATION_12HR	43	Selected genes down-regulated in the TLX1 [GeneID=3195] Tet On iEBHX15-4 cells (pro-erythroblasts) at 12 h time point.	2	0.0465	8.54e-06	0.0021
LEE_AGING_MUSCLE_UP	45	Upregulated in the gastrocnemius muscle of aged adult mice (30-month) vs young adult (5-month)	2	0.0444	9.36e-06	0.0021
Cluster III upregulated genesets
Collection(s):	C2
# overlaps shown:	20
# genesets in collections:	4722
# genes in comparison (n):	27
# genes in universe (N):	45956
Gene Set Name	# Genes in Gene Set (K)	Description	# Genes in Overlap (k)	k/K	p-value	FDR q-value
CAIRO_HEPATOBLASTOMA_CLASSES_UP	605	Genes up-regulated in robust Cluster 2 (rC2) of hepatoblastoma samples compared to those in the robust Cluster 1 (rC1).	13	0.0215	0	0
BERENJENO_TRANSFORMED_BY_RHOA_UP	536	Genes up-regulated in NIH3T3 cells (fibroblasts) transformed by expression of contitutively active (Q63L) form of RHOA [GeneID=387] off plasmid vector.	13	0.0243	0	0
SHEDDEN_LUNG_CANCER_POOR_SURVIVAL_A6	456	Cluster 6 of method A: up-regulation of these genes in patients with non-small cell lung cancer (NSCLC) predicts poor survival outcome.	13	0.0285	0	0
VECCHI_GASTRIC_CANCER_EARLY_UP	430	Up-regulated genes distinguishing between early gastric cancer (EGC) and normal tissue samples.	13	0.0302	0	0
LINDGREN_BLADDER_CANCER_CLUSTER_3_UP	329	Genes whose expression profile is specific to Cluster III of urothelial cell carcinoma (UCC) tumors.	11	0.0334	0	0
DUTERTRE_ESTRADIOL_RESPONSE_24HR_UP	324	Genes up-regulated in MCF7 cells (breast cancer) at 24 h of estradiol [PubChemID=5757] treatment.	11	0.034	0	0
BASAKI_YBX1_TARGETS_UP	290	Genes up-regulated in SKOC-3 cells (ovarian cancer) after YB-1 (YBX1) [GeneID=4904] knockdown by RNAi.	11	0.0379	0	0
HORIUCHI_WTAP_TARGETS_DN	310	Genes down-regulated in primary endothelial cells (HUVEC) after knockdown of WTAP [GeneID=9589] by RNAi.	12	0.0387	0	0
BENPORATH_PROLIFERATION	147	Set 'Proliferation Cluster': genes defined in human breast tumor expression data.	10	0.068	0	0
ZHOU_CELL_CYCLE_GENES_IN_IR_RESPONSE_24HR	128	Cell cycle genes significantly (p =< 0.05) changed in fibroblast cells at 24 h after exposure to ionizing radiation.	9	0.0703	0	0
ROSTY_CERVICAL_CANCER_PROLIFERATION_CLUSTER	140	The 'Cervical Cancer Proliferation Cluster' (CCPC): genes whose expression in cervical carcinoma positively correlates with that of the HPV E6 and E7 oncogenes; they are also differentially expressed according to disease outcome.	10	0.0714	0	0
SOTIRIOU_BREAST_CANCER_GRADE_1_VS_3_UP	151	Up-regulated genes whose expression correlated with histologic grade of invasive breast cancer tumors: comparison of grade 1 vs grade 3.	11	0.0728	0	0
WHITEFORD_PEDIATRIC_CANCER_MARKERS	116	Differentially expressed genes in a panel of xenografts representing 8 common pediatric tumors compared to the normal tissues.	9	0.0776	0	0
LEE_EARLY_T_LYMPHOCYTE_UP	107	Genes up-regulated at early stages of progenitor T lymphocyte maturation compared to the late stages.	9	0.0841	0	0
CROONQUIST_IL6_DEPRIVATION_DN	98	Genes down-regulated in the ANBL-6 cell line (multiple myeloma, MM) after withdrawal of IL6 [GeneID=3569].	9	0.0918	0	0
RHODES_UNDIFFERENTIATED_CANCER	69	Genes commonly up-regulated in undifferentiated cancer relative to well-differentiated cancer, based on the meta-analysis of the OncoMine gene expression database.	8	0.1159	0	0
ISHIDA_E2F_TARGETS	53	Genes up-regulated in MEF cells (embryonic fibroblast) after expression of E2F1 or E2F2 [GeneID=1869;1870].	8	0.1509	0	0
KOBAYASHI_EGFR_SIGNALING_24HR_DN	251	Genes down-regulated in H1975 cells (non-small cell lung cancer, NSCLC) resistant to gefitinib [PubChem=123631] after treatment with EGFR inhibitor CL-387785 [PubChem=2776] for 24h.	10	0.0398	1.11e-16	2.91e-14
GOBERT_OLIGODENDROCYTE_DIFFERENTIATION_UP	570	Genes up-regulated during later stage of differentiation of Oli-Neu cells (oligodendroglial precursor) in response to PD174265 [PubChemID=4709].	12	0.0211	2.22e-16	5.52e-14
WINNEPENNINCKX_MELANOMA_METASTASIS_UP	162	Genes from the 254-gene classifier which were up-regulated in melanoma patients with a reported distant metastasis within 4 years.	9	0.0556	3.33e-16	7.86e-14

## Sheet: Supplemental Table 8
Gene Symbol	Number of Alterations	Actionability Category	Potential therapy	Gene Symbol	Reference
TP53	73	D	Prognostic (poor, potentially sensitive to WEE1 inhibitors e.g. MK1775)		Varna M, Bousquet G, Plassa LF, Bertheau P, Janin A. TP53 status and response to treatment in breast cancers. J Biomed Biotechnol. 2011;2011:284584.
MCL1	40	C	Resistance to anti-tubulins e.g.paclitaxel, MCL1 inhibitor in development		Wertz IE, Kusam S, Lam C, Okamoto T, Sandoval W, Anderson DJ et al. Sensitivity to antitubulin chemotherapeutics is regulated by MCL1 and FBW7. Nature. 2011 Mar 3;471(7336):110-4.
MYC	24	C	Aurora kinase inhibitors e.g. MLN8237, AMG 900; possible sensitivity to CDK inhibitors		Chen Y, Olopade OI. MYC in breast tumor progression. Expert Rev Anticancer Ther. 2008 Oct;8(10):1689-98.
PIK3CA	13	B	PI3 kinase, mTOR inhibitors e.g. Everolimus, Temsirolimus, others		Hernandez-Aya LF, Gonzalez-Angulo AM. Targeting the phosphatidylinositol 3-kinase signaling pathway in breast cancer. Oncologist. 2011;16(4):404-14.
PTEN	12	B	PI3K/mTOR inhibitors e.g. GSK2636771, Everolimus, Temsirolimus, others		DeGraffenried LA, Fulcher L, Friedrichs WE, Grünwald V, Ray RB, Hidalgo M. Reduced PTEN expression in breast cancer cells confers susceptibility to inhibitors of the PI3 kinase/Akt pathway. Ann Oncol. 2004 Oct;15(10):1510-6.
BRCA1	9	B	PARP Inhibitors e.g. Olaparib, CEP-9722, Rucaparib, others		Maxwell KN, Domchek SM. Cancer treatment according to BRCA1 and BRCA2 mutations. Nat Rev Clin Oncol. 2012 Sep;9(9):520-8.
RB1	9	D	Prognostic		Jiang Z, Jones R, Liu JC, Deng T, Robinson T, Chung PE, Wang S, Herschkowitz JI, Egan SE, Perou CM, Zacksenhaus E. RB1 and p53 at the crossroad of EMT and triple-negative breast cancer. Cell Cycle. 2011 May 15;10(10):1563-70.
JAK2	8	D	JAK2 inhibitors e.g. Ruxolitinib, others		Britschgi A, Andraos R, Brinkhaus H, Klebba I, Romanet V, Müller U, Murakami M, Radimerski T, Bentires-Alj M. JAK2/STAT5 inhibition circumvents resistance to PI3K/mTOR blockade: a rationale for cotargeting these pathways in metastatic breast cancer. Cancer Cell. 2012 Dec 11;22(6):796-811.
ERBB2	7	A	Herceptin, Lapatinib and others		Ross JS, Slodkowska EA, Symmans WF, Pusztai L, Ravdin PM, Hortobagyi GN. The HER-2 receptor and breast cancer: ten years of targeted anti-HER-2 therapy and personalized medicine. Oncologist. 2009 Apr;14(4):320-68.
CDKN2A/B	7	E	CDK4/6 inhibitors e.g. PD0332991, LEE011, P276-00		Węsierska-Gądek J, Kramer MP. The impact of multi-targeted cyclin-dependent kinase inhibition in breast cancer cells: clinical implications. Expert Opin Investig Drugs. 2011 Dec;20(12):1611-28.
NF1	5	C	MAPK/PI3K/mTOR inhibitors e.g. MSC1936369B, Everolimus, Temsirolimus, others		Wallace MD, Pfefferle AD, Shen L, McNairn AJ, Cerami EG, Fallon BL, Rinaldi VD, Southard TL, Perou CM, Schimenti JC. Comparative oncogenomics implicates the neurofibromin 1 gene (NF1) as a breast cancer driver. Genetics. 2012 Oct;192(2):385-96.
AKT3	5	C	AKT inhibitors e.g. MK2206, PI3K/mTOR inhibitors e.g. Everolimus, Temsirolimus		Bartlett JM. Biomarkers and patient selection for PI3K/Akt/mTOR targeted therapies: current status and future directions. Clin Breast Cancer. 2010 Nov;10 Suppl 3:S86-95.
KRAS	5	A	Resistance to cetuximab, MEK inhibitors e.g. MEK162		Clark GJ, Der CJ. Aberrant function of the Ras signal transduction pathway in human breast cancer. Breast Cancer Res Treat. 1995 Jul;35(1):133-44.
CCND1	5	C	CDK4/6 inhibitors e.g. PD0332991, LEE011, P276-00		Węsierska-Gądek J, Kramer MP. The impact of multi-targeted cyclin-dependent kinase inhibition in breast cancer cells: clinical implications. Expert Opin Investig Drugs. 2011 Dec;20(12):1611-28.
CCND3	4	C	CDK inhibitors, Kinetin riboside		Węsierska-Gądek J, Kramer MP. The impact of multi-targeted cyclin-dependent kinase inhibition in breast cancer cells: clinical implications. Expert Opin Investig Drugs. 2011 Dec;20(12):1611-28.
CCNE1	4	C	CDK2/4/6 inhibitors e.g. ABT-888, PD0332991, LEE011, P276-00		Węsierska-Gądek J, Kramer MP. The impact of multi-targeted cyclin-dependent kinase inhibition in breast cancer cells: clinical implications. Expert Opin Investig Drugs. 2011 Dec;20(12):1611-28.
CCND2	4	C	CDK inhibitors, Kinetin riboside		Węsierska-Gądek J, Kramer MP. The impact of multi-targeted cyclin-dependent kinase inhibition in breast cancer cells: clinical implications. Expert Opin Investig Drugs. 2011 Dec;20(12):1611-28.
CDK6	4	C	CDK4/6 inhibitors e.g. PD0332991, LEE011, P276-00		Węsierska-Gądek J, Kramer MP. The impact of multi-targeted cyclin-dependent kinase inhibition in breast cancer cells: clinical implications. Expert Opin Investig Drugs. 2011 Dec;20(12):1611-28.
IGF1R	4	C	IGF1-R Inhibitors e.g. AMG-479, BMS-754808, MK-0646, IMC A12, others		Sachdev D. Targeting the type I insulin-like growth factor system for breast cancer therapy. Curr Drug Targets. 2010 Sep;11(9):1121-32.
LRP1B	3	E	Biologically relevant, presently no known targeted therapies		Craig DW, O'Shaughnessy JA, Kiefer JA, Aldrich J, Sinari S, Moses TM, Wong S, Dinh J, Christoforides A, Blum JL, Aitelli CL, Osborne CR, Izatt T, Kurdoglu A, Baker A, Koeman J, Barbacioru C, Sakarya O, De La Vega FM, Siddiqui A, Hoang L, Billings PR, Salhia B, Tolcher AW, Trent JM, Mousses S, Von Hoff D, Carpten JD. Genome and transcriptome sequencing in prospective metastatic triple-negative bre…
PIK3R1	3	C	PI3K-PATHWAY INHIBITORS		Hernandez-Aya LF, Gonzalez-Angulo AM. Targeting the phosphatidylinositol 3-kinase signaling pathway in breast cancer. Oncologist. 2011;16(4):404-14.
ATM	3	C	PARP Inhibitors e.g. Olaparib, CEP-9722, Rucaparib		Maxwell KN, Domchek SM. Cancer treatment according to BRCA1 and BRCA2 mutations. Nat Rev Clin Oncol. 2012 Sep;9(9):520-8.
BRCA2	3	B	PARP Inhibitors e.g. Olaparib, CEP-9722, Rucaparib, others		Maxwell KN, Domchek SM. Cancer treatment according to BRCA1 and BRCA2 mutations. Nat Rev Clin Oncol. 2012 Sep;9(9):520-8.
EGFR	3	A	Cetuximab, Panitumumab and others		Burness ML, Grushko TA, Olopade OI. Epidermal growth factor receptor in triple-negative and basal-like breast cancer: promising clinical target or only a marker? Cancer J. 2010 Jan-Feb;16(1):23-32.
FBXW7	3	C	Resistance to anti-tubulins, potential sensitivity to PI3K/mTOR inhibitors		Wertz IE, Kusam S, Lam C, Okamoto T, Sandoval W, Anderson DJ et al. Sensitivity to antitubulin chemotherapeutics is regulated by MCL1 and FBW7. Nature. 2011 Mar 3;471(7336):110-4.
CDK4	3	C	CDK4/6 inhibitors e.g. PD0332991, LEE011, P276-00		Węsierska-Gądek J, Kramer MP. The impact of multi-targeted cyclin-dependent kinase inhibition in breast cancer cells: clinical implications. Expert Opin Investig Drugs. 2011 Dec;20(12):1611-28.
RPTOR	3	E	Biologically relevant, possible sensitivity to mTORC1 and mTORC2 inhibitors		Villarreal-Garza C, Cortes J, Andre F, Verma S. mTOR inhibitors in the management of hormone receptor-positive breast cancer: the latest evidence and future directions. Ann Oncol. 2012 Oct;23(10):2526-35.
