# Supplementary figures and images for: Molecular Profiling of the Residual Disease of Triple-Negative Breast Cancers after Neoadjuvant Chemotherapy Identifies Actionable Therapeutic Targets
Source: Oxford University Press journal article supplement (doi:10.1158/2159-8290.cd-13-0286), 2013-12-19

# Supplemental Figure 5, Arteaga

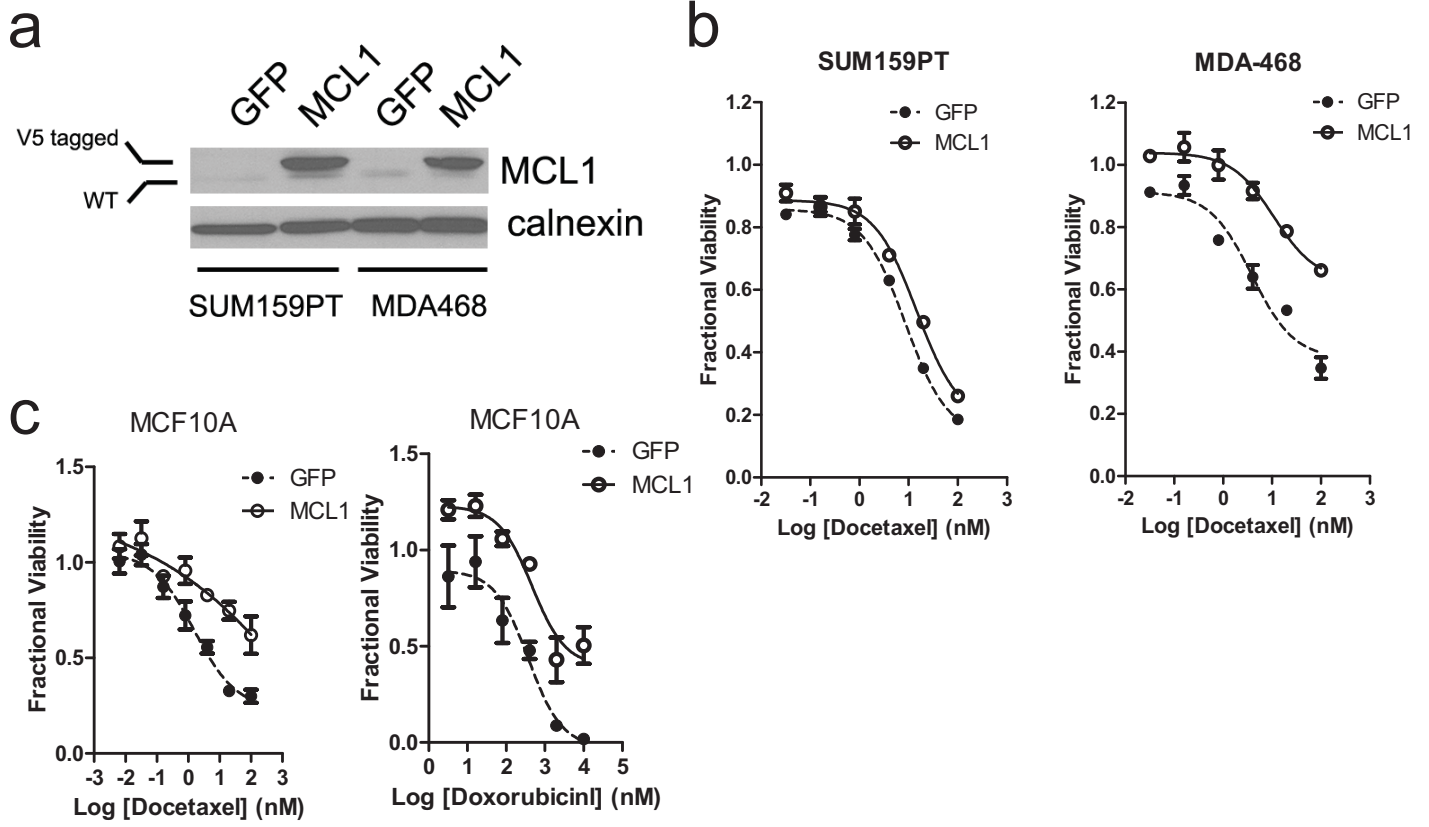

Supplement: 21598290cd130286-sup-supp_fig_5.pdf [file 21598290cd130286-sup-supp_fig_5.pdf]
